# Supplementary material for: An improved workflow for accurate and robust healthcare environmental surveillance using metagenomics
Source: Microbiome. 2022 Dec 2;10:206. doi: 10.1186/s40168-022-01412-x (PMC9716758; doi:10.1186/s40168-022-01412-x)
Supplement: Supplementary file 3 — Additional file 2: Table S1. Dataset of hospital-related environmental metagenomic samples used in the machine learning models. [file 40168_2022_1412_MOESM2_ESM.xlsx]

## Sheet: sample_recruited
study	Title	keywords	Sample no	np no (kmer)	sample no_included	nonpareil log_highlights	comment
Shen	NA	ICU; surface; averaged	136	82	82	error: 54 samples do not have 1e5 reads 0 WARNING
mahnert	Man-made microbial resistances in built environments	Floor samples; large scale; to get enough biomass; pooled	1	1	1	0 error 0 WARNING	only 1 sample is hospital related
lax	Bacterial colonization and succession in a newly opened hospital	hospital: bedrail, cell phone, etc	16	14	14	error: 2 samples do not have 1e5 reads 0 WARNING
brooks	Strain-resolved analysis of hospital rooms and infants reveals overlap between the human and room microbiome	NICU; samples collected at different times were pooled (filtered)	24	21	19	error: 3 samples: Reads are required to have a minimum length of kmer size WARNING: The curve reached near-saturation, hence coverage estimations could be unreliable (SRR5420278, SRR5420280, SRR5420281, SRR5420284, SRR5420287, SRR5420289, SRR5420293, SRR5420294, SRR5420296, SRR5420290)	2 hand samples were exlcuded
O'Hara	Metagenomic characterization of ambulances across the USA	ambulance	398	392	392	error: 6 samples: Reads are required to have a minimum length of kmer size 144 WARNING: The curve reached near-saturation, hence coverage estimations could be unreliable
chng	Cartography of opportunistic pathogens and antibiotic resistance genes in a tertiary hospital environment	hospital	428	428	428	0 error WARNING: The curve reached near-saturation, hence coverage estimations could be unreliable {ERR3209755, ERR3209757, ERR3209785, ERR3209792, ERR3209803, ERR3209852, ERR3209860, ERR3209863, ERR3209978, ERR3209996, ERR3210011, ERR3210065, ERR3675725, ERR3675726, ERR3675729, ERR3675730, ERR3675731, ERR3675732, ERR3675733, ERR3675737, ERR3675738, ERR3675739, ERR3675746, ERR3675751, ERR3675752,…
constantinides	Genomic surveillance of Escherichia coli and Klebsiella spp. in hospital sink drains and patients	hospital sink	20	20	20	0 error WARNING: The curve reached near-saturation, hence coverage estimations could be unreliable {ERR3928854, ERR3928886, ERR3928887, ERR3928888, ERR3928889, ERR3928891, ERR3928892, ERR3928893, ERR3928927}

## Sheet: nonpareil_dataset
sample_id	kappa	C	LR	modelR	LRstar	diversity	study	location	sample_type	touch_frequency	sampling_method	sampling_area_cm2	building	pooled	geography	sequencer	comment
C-CDC-AG-Lu-1-10	0.87429	0.884435	8.67182e+07	0.999298	1.67545e+08	15.6839	shen	Averaged	surface	averaged	swab	216.1	ICU	averaged	Chicago	Illumina MiSeq
C-CDC-AG-Lu-1-1	0.89555	0.904075	1.20869e+08	0.999304	1.71133e+08	15.7406	shen	Averaged	surface	averaged	swab	216.1	ICU	averaged	Chicago	Illumina MiSeq
C-CDC-AG-Lu-1-5	0.88484	0.894186	1.05598e+08	0.999239	1.7455e+08	15.7137	shen	Averaged	surface	averaged	swab	216.1	ICU	averaged	Chicago	Illumina MiSeq
C-CDC-AG-Lu-2-10	0.8704	0.880838	9.66311e+07	0.999196	1.77283e+08	15.7278	shen	Averaged	surface	averaged	swab	216.1	ICU	averaged	Chicago	Illumina MiSeq
C-CDC-AG-Lu-2-1	0.86655	0.877275	7.29319e+07	0.999295	1.55316e+08	15.6739	shen	Averaged	surface	averaged	swab	216.1	ICU	averaged	Chicago	Illumina MiSeq
C-CDC-AG-Lu-2-5	0.87369	0.883881	9.20607e+07	0.999217	1.73704e+08	15.7196	shen	Averaged	surface	averaged	swab	216.1	ICU	averaged	Chicago	Illumina MiSeq
C-CDC-AG-Lu-3-10	0.88781	0.89693	9.49815e+07	0.999279	1.53835e+08	15.6433	shen	Averaged	surface	averaged	swab	216.1	ICU	averaged	Chicago	Illumina MiSeq
C-CDC-AG-Lu-3-1	0.88269	0.8922	9.58065e+07	0.999261	1.6062e+08	15.6473	shen	Averaged	surface	averaged	swab	216.1	ICU	averaged	Chicago	Illumina MiSeq
C-CDC-AG-Lu-3-5	0.87975	0.889483	8.05994e+07	0.99927	1.44285e+08	15.5892	shen	Averaged	surface	averaged	swab	216.1	ICU	averaged	Chicago	Illumina MiSeq
C-CDC-INF100-Lu-1-1	0.52068	0.550696	3.25996e+07	0.99953	7.79066e+08	16.9274	shen	Averaged	surface	averaged	swab	216.1	ICU	averaged	Chicago	Illumina MiSeq
C-CDC-INF100-Lu-2-1	0.46769	0.499232	2.95392e+07	0.99959	9.00886e+08	17.0779	shen	Averaged	surface	averaged	swab	216.1	ICU	averaged	Chicago	Illumina MiSeq
C-CDC-INF100-Lu-3-1	0.57994	0.60772	4.29977e+07	0.999483	7.03898e+08	16.9408	shen	Averaged	surface	averaged	swab	216.1	ICU	averaged	Chicago	Illumina MiSeq
C-CDC-INF100-Lu-swab-1	0.74998	0.768742	7.19511e+07	0.999344	4.1061e+08	16.3414	shen	Averaged	surface	averaged	swab	216.1	ICU	averaged	Chicago	Illumina MiSeq
C-CDC-INF5-Lu-1-1	0.71248	0.733528	4.129e+07	0.999332	3.0912e+08	16.0602	shen	Averaged	surface	averaged	swab	216.1	ICU	averaged	Chicago	Illumina MiSeq
C-CDC-INF5-Lu-2-1	0.73934	0.758766	4.62574e+07	0.9993	2.76094e+08	15.98	shen	Averaged	surface	averaged	swab	216.1	ICU	averaged	Chicago	Illumina MiSeq
C-CDC-INF5-Lu-3-1	0.74362	0.76278	4.0651e+07	0.999349	2.38153e+08	15.887	shen	Averaged	surface	averaged	swab	216.1	ICU	averaged	Chicago	Illumina MiSeq
C-CDC-INF-Lu-1-1	0.72767	0.747811	4.17662e+07	0.999295	2.6427e+08	15.9804	shen	Averaged	surface	averaged	swab	216.1	ICU	averaged	Chicago	Illumina MiSeq
C-CDC-INF-Lu-2-1	0.67925	0.702191	3.62137e+07	0.999427	3.28628e+08	16.1136	shen	Averaged	surface	averaged	swab	216.1	ICU	averaged	Chicago	Illumina MiSeq
C-CDC-INF-Lu-3-1	0.71848	0.739173	4.30322e+07	0.99935	3.02472e+08	16.0264	shen	Averaged	surface	averaged	swab	216.1	ICU	averaged	Chicago	Illumina MiSeq
C-CDC-IN-Lu-1-1	0.70676	0.728143	5.91563e+07	0.999003	4.43346e+08	16.279	shen	Averaged	surface	averaged	swab	216.1	ICU	averaged	Chicago	Illumina MiSeq
C-CDC-IN-Lu-2-1	0.67575	0.698882	4.61923e+07	0.999273	4.24612e+08	16.3323	shen	Averaged	surface	averaged	swab	216.1	ICU	averaged	Chicago	Illumina MiSeq
C-CDC-IN-Lu-3-1	0.68154	0.704354	5.33256e+07	0.999114	4.93645e+08	16.3447	shen	Averaged	surface	averaged	swab	216.1	ICU	averaged	Chicago	Illumina MiSeq
C-CDC-INN-Lu-1-1	0.67845	0.701435	3.96048e+07	0.999347	3.75409e+08	16.1616	shen	Averaged	surface	averaged	swab	216.1	ICU	averaged	Chicago	Illumina MiSeq
C-CDC-INN-Lu-2-1	0.67869	0.701661	3.42716e+07	0.999443	3.34862e+08	16.0661	shen	Averaged	surface	averaged	swab	216.1	ICU	averaged	Chicago	Illumina MiSeq
C-CDC-INN-Lu-3-1	0.67556	0.698703	3.74582e+07	0.999428	3.60577e+08	16.1602	shen	Averaged	surface	averaged	swab	216.1	ICU	averaged	Chicago	Illumina MiSeq
C-CDC-IPF100-Lu-1-1	0.81112	0.825834	3.5379e+07	0.999016	1.37345e+08	15.7591	shen	Averaged	surface	averaged	swab	216.1	ICU	averaged	Chicago	Illumina MiSeq
C-CDC-IPF100-Lu-2-1	0.9045	0.912331	6.61015e+07	0.998936	1.06863e+08	15.674	shen	Averaged	surface	averaged	swab	216.1	ICU	averaged	Chicago	Illumina MiSeq
C-CDC-IPF100-Lu-3-1	0.92882	0.934729	8.5204e+07	0.998697	9.95371e+07	15.6615	shen	Averaged	surface	averaged	swab	216.1	ICU	averaged	Chicago	Illumina MiSeq
C-CDC-IPF100-Lu-swab-1	0.84127	0.853851	3.7623e+07	0.999204	1.11041e+08	15.4608	shen	Averaged	surface	averaged	swab	216.1	ICU	averaged	Chicago	Illumina MiSeq
C-CDC-IPF5-Lu-1-1	0.86929	0.879811	4.66448e+07	0.999181	9.70827e+07	15.4328	shen	Averaged	surface	averaged	swab	216.1	ICU	averaged	Chicago	Illumina MiSeq
C-CDC-IPF5-Lu-3-1	0.90256	0.910542	7.32614e+07	0.999107	8.98756e+07	15.4055	shen	Averaged	surface	averaged	swab	216.1	ICU	averaged	Chicago	Illumina MiSeq
C-CDC-IPF-Lu-1-1	0.88358	0.893022	5.79346e+07	0.999004	9.19637e+07	15.3522	shen	Averaged	surface	averaged	swab	216.1	ICU	averaged	Chicago	Illumina MiSeq
C-CDC-IPF-Lu-2-1	0.88829	0.897373	5.60762e+07	0.999064	8.89152e+07	15.3465	shen	Averaged	surface	averaged	swab	216.1	ICU	averaged	Chicago	Illumina MiSeq
C-CDC-IPF-Lu-3-1	0.85892	0.870212	4.05034e+07	0.999124	9.41171e+07	15.3712	shen	Averaged	surface	averaged	swab	216.1	ICU	averaged	Chicago	Illumina MiSeq
C-CDC-IP-Lu-1-1	0.90141	0.909481	6.74088e+07	0.999013	8.64996e+07	15.3594	shen	Averaged	surface	averaged	swab	216.1	ICU	averaged	Chicago	Illumina MiSeq
C-CDC-IP-Lu-2-1	0.87446	0.884593	4.34562e+07	0.999084	8.91808e+07	15.3505	shen	Averaged	surface	averaged	swab	216.1	ICU	averaged	Chicago	Illumina MiSeq
C-CDC-IP-Lu-3-1	0.8786	0.88842	5.00705e+07	0.999142	9.26e+07	15.3744	shen	Averaged	surface	averaged	swab	216.1	ICU	averaged	Chicago	Illumina MiSeq
C-CDC-IPN-Lu-1-1	0.87308	0.883316	5.43223e+07	0.999154	1.05155e+08	15.4472	shen	Averaged	surface	averaged	swab	216.1	ICU	averaged	Chicago	Illumina MiSeq
C-CDC-IPN-Lu-2-1	0.88507	0.894399	4.91357e+07	0.999064	8.81114e+07	15.3392	shen	Averaged	surface	averaged	swab	216.1	ICU	averaged	Chicago	Illumina MiSeq
C-CDC-IPN-Lu-3-1	0.89382	0.902478	5.85535e+07	0.999012	8.70627e+07	15.3537	shen	Averaged	surface	averaged	swab	216.1	ICU	averaged	Chicago	Illumina MiSeq
C-CDC-NNF100-Lu-1-1	0.62048	0.64644	4.02638e+07	0.999393	5.17422e+08	16.7056	shen	Averaged	surface	averaged	swab	216.1	ICU	averaged	Chicago	Illumina MiSeq
C-CDC-NNF100-Lu-2-1	0.68149	0.704307	4.99275e+07	0.999238	4.10718e+08	16.7093	shen	Averaged	surface	averaged	swab	216.1	ICU	averaged	Chicago	Illumina MiSeq
C-CDC-NNF100-Lu-swab-1	0.62536	0.651086	3.73872e+07	0.999507	4.61957e+08	16.5856	shen	Averaged	surface	averaged	swab	216.1	ICU	averaged	Chicago	Illumina MiSeq
C-CDC-NNF5-Lu-1-1	0.748	0.766886	4.30318e+07	0.999361	2.41481e+08	15.9635	shen	Averaged	surface	averaged	swab	216.1	ICU	averaged	Chicago	Illumina MiSeq
C-CDC-NNF5-Lu-2-1	0.78761	0.803926	5.51184e+07	0.99923	2.19491e+08	15.8857	shen	Averaged	surface	averaged	swab	216.1	ICU	averaged	Chicago	Illumina MiSeq
C-CDC-NNF5-Lu-3-1	0.80161	0.816979	5.00735e+07	0.999246	1.82516e+08	15.7471	shen	Averaged	surface	averaged	swab	216.1	ICU	averaged	Chicago	Illumina MiSeq
C-CDC-NNF-Lu-1-1	0.77078	0.788208	3.13272e+07	0.999339	1.50149e+08	15.6286	shen	Averaged	surface	averaged	swab	216.1	ICU	averaged	Chicago	Illumina MiSeq
C-CDC-NNF-Lu-2-1	0.80901	0.82387	3.79066e+07	0.999286	1.38547e+08	15.5423	shen	Averaged	surface	averaged	swab	216.1	ICU	averaged	Chicago	Illumina MiSeq
C-CDC-NNF-Lu-3-1	0.74925	0.768058	2.93327e+07	0.999372	1.66816e+08	15.6679	shen	Averaged	surface	averaged	swab	216.1	ICU	averaged	Chicago	Illumina MiSeq
C-CDC-NN-Lu-1-1	0.77745	0.794441	4.88151e+07	0.999341	2.16196e+08	15.8373	shen	Averaged	surface	averaged	swab	216.1	ICU	averaged	Chicago	Illumina MiSeq
C-CDC-NN-Lu-2-1	0.68227	0.705044	2.5804e+07	0.999457	2.34971e+08	15.8821	shen	Averaged	surface	averaged	swab	216.1	ICU	averaged	Chicago	Illumina MiSeq
C-CDC-NN-Lu-3-1	0.74322	0.762405	3.33844e+07	0.999383	2.02367e+08	15.7831	shen	Averaged	surface	averaged	swab	216.1	ICU	averaged	Chicago	Illumina MiSeq
C-CDC-NNN-Lu-1-1	0.79648	0.812198	5.52732e+07	0.999229	2.02353e+08	15.8281	shen	Averaged	surface	averaged	swab	216.1	ICU	averaged	Chicago	Illumina MiSeq
C-CDC-NNN-Lu-2-1	0.774	0.791218	4.57439e+07	0.999306	2.09464e+08	15.8167	shen	Averaged	surface	averaged	swab	216.1	ICU	averaged	Chicago	Illumina MiSeq
C-CDC-NNN-Lu-3-1	0.7805	0.797289	4.70616e+07	0.999283	2.04062e+08	15.8287	shen	Averaged	surface	averaged	swab	216.1	ICU	averaged	Chicago	Illumina MiSeq
C-CDC-NPF100-Lu-1-1	0.67897	0.701926	3.12765e+07	0.999382	3.15417e+08	16.0574	shen	Averaged	surface	averaged	swab	216.1	ICU	averaged	Chicago	Illumina MiSeq
C-CDC-NPF100-Lu-2-1	0.79551	0.811294	6.53144e+07	0.999262	2.86777e+08	16.0774	shen	Averaged	surface	averaged	swab	216.1	ICU	averaged	Chicago	Illumina MiSeq
C-CDC-NPF100-Lu-3-1	0.71879	0.739464	4.11805e+07	0.999347	3.19004e+08	16.1039	shen	Averaged	surface	averaged	swab	216.1	ICU	averaged	Chicago	Illumina MiSeq
C-CDC-NPF100-Lu-swab-1	0.81828	0.832496	5.15621e+07	0.99923	1.62802e+08	15.6961	shen	Averaged	surface	averaged	swab	216.1	ICU	averaged	Chicago	Illumina MiSeq
C-CDC-NPF5-Lu-1-1	0.86044	0.871619	5.03349e+07	0.999162	1.08445e+08	15.4602	shen	Averaged	surface	averaged	swab	216.1	ICU	averaged	Chicago	Illumina MiSeq
C-CDC-NPF5-Lu-2-1	0.84873	0.860769	4.50649e+07	0.999148	1.12282e+08	15.4722	shen	Averaged	surface	averaged	swab	216.1	ICU	averaged	Chicago	Illumina MiSeq
C-CDC-NPF5-Lu-3-1	0.81885	0.833026	3.46792e+07	0.9992	1.13636e+08	15.4875	shen	Averaged	surface	averaged	swab	216.1	ICU	averaged	Chicago	Illumina MiSeq
C-CDC-NPF-Lu-1-1	0.88145	0.891054	5.22466e+07	0.99902	9.18537e+07	15.3564	shen	Averaged	surface	averaged	swab	216.1	ICU	averaged	Chicago	Illumina MiSeq
C-CDC-NPF-Lu-2-1	0.88824	0.897327	5.88419e+07	0.999065	9.02314e+07	15.355	shen	Averaged	surface	averaged	swab	216.1	ICU	averaged	Chicago	Illumina MiSeq
C-CDC-NPF-Lu-3-1	0.86605	0.876813	4.3209e+07	0.999095	9.42676e+07	15.3529	shen	Averaged	surface	averaged	swab	216.1	ICU	averaged	Chicago	Illumina MiSeq
C-CDC-NP-Lu-1-1	0.88673	0.895932	6.50235e+07	0.999079	9.7651e+07	15.4018	shen	Averaged	surface	averaged	swab	216.1	ICU	averaged	Chicago	Illumina MiSeq
C-CDC-NP-Lu-2-1	0.87988	0.889603	5.98869e+07	0.999038	1.00045e+08	15.4039	shen	Averaged	surface	averaged	swab	216.1	ICU	averaged	Chicago	Illumina MiSeq
C-CDC-NP-Lu-3-1	0.86488	0.87573	5.11966e+07	0.999171	1.04077e+08	15.4567	shen	Averaged	surface	averaged	swab	216.1	ICU	averaged	Chicago	Illumina MiSeq
C-CDC-NPN-Lu-1-1	0.87307	0.883307	5.36654e+07	0.999036	9.99989e+07	15.4029	shen	Averaged	surface	averaged	swab	216.1	ICU	averaged	Chicago	Illumina MiSeq
C-CDC-NPN-Lu-2-1	0.87358	0.883779	5.13617e+07	0.999023	9.99255e+07	15.3893	shen	Averaged	surface	averaged	swab	216.1	ICU	averaged	Chicago	Illumina MiSeq
C-CDC-NPN-Lu-3-1	0.88236	0.891895	6.20096e+07	0.998968	9.92524e+07	15.3989	shen	Averaged	surface	averaged	swab	216.1	ICU	averaged	Chicago	Illumina MiSeq
C-CDC-SNF5-Lu-1-1	0.68544	0.708038	4.86207e+07	0.999456	4.11484e+08	16.5188	shen	Averaged	surface	averaged	swab	216.1	ICU	averaged	Chicago	Illumina MiSeq
C-CDC-SNF5-Lu-2-1	0.73108	0.751013	7.26636e+07	0.999456	4.65991e+08	16.639	shen	Averaged	surface	averaged	swab	216.1	ICU	averaged	Chicago	Illumina MiSeq
C-CDC-SNF-Lu-1-1	0.73605	0.755679	6.81876e+07	0.999205	3.9099e+08	16.8222	shen	Averaged	surface	averaged	swab	216.1	ICU	averaged	Chicago	Illumina MiSeq
C-CDC-SNF-Lu-2-1	0.55444	0.583247	3.80182e+07	0.999398	5.73256e+08	16.9974	shen	Averaged	surface	averaged	swab	216.1	ICU	averaged	Chicago	Illumina MiSeq
C-CDC-SNF-Lu-3-1	0.52602	0.555856	3.43651e+07	0.999421	5.93146e+08	17.0149	shen	Averaged	surface	averaged	swab	216.1	ICU	averaged	Chicago	Illumina MiSeq
C-CDC-SN-Lu-1-1	0.51513	0.545328	3.83191e+07	0.999427	7.35175e+08	17.1643	shen	Averaged	surface	averaged	swab	216.1	ICU	averaged	Chicago	Illumina MiSeq
C-CDC-SN-Lu-2-1	0.60336	0.630116	4.99729e+07	0.999108	6.23767e+08	17.0717	shen	Averaged	surface	averaged	swab	216.1	ICU	averaged	Chicago	Illumina MiSeq
C-CDC-SN-Lu-3-1	0.60048	0.627366	4.99876e+07	0.999223	6.12497e+08	17.0856	shen	Averaged	surface	averaged	swab	216.1	ICU	averaged	Chicago	Illumina MiSeq
C-CDC-SNN-Lu-1-1	0.64007	0.665072	4.83123e+07	0.999374	4.65356e+08	16.8762	shen	Averaged	surface	averaged	swab	216.1	ICU	averaged	Chicago	Illumina MiSeq
C-CDC-SNN-Lu-2-1	0.664	0.687765	5.37434e+07	0.999314	4.57532e+08	16.8864	shen	Averaged	surface	averaged	swab	216.1	ICU	averaged	Chicago	Illumina MiSeq
C-CDC-SNN-Lu-3-1	0.59838	0.62536	4.32781e+07	0.999394	5.12389e+08	16.9467	shen	Averaged	surface	averaged	swab	216.1	ICU	averaged	Chicago	Illumina MiSeq
ERR2699811	0.54028	0.569615	1.13479e+09	0.992176	4.28672e+11	18.9059	mahnert	Floor	surface	low	wipe	10000	ICU	pooled	Austria	Illumina HiSeq 2500	large scale; to get enough biomass (1 building 1 sample)
ERR1332584	0.8021	0.817435	3.65418e+08	0.991062	8.02769e+08	15.9492	lax	Bedrail	surface	high	swab	NA	Hospital	N	Chicago	Illumina HiSeq 1500
ERR1332589	0.39863	0.431393	2.3063e+08	0.998814	7.69044e+10	19.3717	lax	Bedrail	surface	high	swab	NA	Hospital	N	Chicago	Illumina HiSeq 1500
ERR1332594	0.78955	0.805736	1.68178e+09	0.999128	8.52253e+09	18.5656	lax	Bedrail	surface	high	swab	NA	Hospital	N	Chicago	Illumina HiSeq 1500
ERR1332598	0.45992	0.491645	1.76757e+08	0.99968	1.2655e+10	18.7817	lax	Bedrail	surface	high	swab	NA	Hospital	N	Chicago	Illumina HiSeq 1500
ERR1332602	0.63786	0.662973	6.05835e+08	0.999782	3.46604e+10	18.6504	lax	Bedrail	surface	high	swab	NA	Hospital	N	Chicago	Illumina HiSeq 1500
ERR1332606	0.64129	0.666231	7.17278e+08	0.999157	6.26211e+10	18.2306	lax	Bedrail	surface	high	swab	NA	Hospital	N	Chicago	Illumina HiSeq 1500
ERR1332609	0.61177	0.63814	2.11484e+08	0.997367	6.78324e+09	17.6252	lax	Bedrail	surface	high	swab	NA	Hospital	N	Chicago	Illumina HiSeq 1500
ERR1332613	0.61001	0.636462	3.04163e+08	0.995265	1.43052e+10	17.7214	lax	Bedrail	surface	high	swab	NA	Hospital	N	Chicago	Illumina HiSeq 1500
ERR1332617	0.51099	0.54132	7.00695e+08	0.999179	1.71179e+11	19.5173	lax	Bedrail	surface	high	swab	NA	Hospital	N	Chicago	Illumina HiSeq 1500
ERR1332621	0.34383	0.376845	2.23698e+08	0.997853	7.69038e+11	19.9985	lax	Bedrail	surface	high	swab	NA	Hospital	N	Chicago	Illumina HiSeq 1500
ERR1332625	0.76992	0.787404	3.00644e+08	0.988635	9.03752e+08	15.9013	lax	Bedrail	surface	high	swab	NA	Hospital	N	Chicago	Illumina HiSeq 1500
ERR1332632	0.27951	0.311847	1.58966e+08	0.999703	6.18533e+11	20.1966	lax	Cellphone	surface	high	swab	NA	Hospital	N	Chicago	Illumina HiSeq 1500
ERR1332633	0.41293	0.445518	116451083	0.998044	1.69542e+10	18.4926	lax	Hospital pager	surface	high	swab	NA	Hospital	N	Chicago	Illumina HiSeq 1500
ERR1332634	0.23637	0.26754	3.10352e+07	0.998518	2.9967e+10	18.737	lax	Shirt hem	surface	high	swab	NA	Hospital	N	Chicago	Illumina HiSeq 1500
SRR5420277	0.35808	0.391097	6.44786e+09	0.999428	4.44804e+12	23.1467	brooks	Floor	surface	low	wipe	48 or entire surface	NICU	pooled	Pittsburgh	Illumina HiSeq 4000
SRR5420278	0.96992	0.972467	1.1918e+10	0.999428	1.68023e+09	18.0955	brooks	Sink basin	sink	sink	sink	NA	NICU	pooled	Pittsburgh	Illumina HiSeq 4000
SRR5420280	0.95043	0.954589	4.59551e+09	0.997361	7.91967e+08	16.3826	brooks	Monitor	surface	high	swab	NA	NICU	pooled	Pittsburgh	Illumina HiSeq 4000
SRR5420281	0.97875	0.980557	1.5443e+10	0.999802	2.52153e+09	18.0929	brooks	Sink basin	sink	sink	sink	NA	NICU	pooled	Pittsburgh	Illumina HiSeq 4000
SRR5420282	0.93393	0.939429	4.4718e+09	0.999785	8.82596e+09	18.4623	brooks	Counter	surface	high	swab	NA	NICU	pooled	Pittsburgh	Illumina HiSeq 4000
SRR5420283	0.35161	0.384632	4.38466e+09	0.998686	1.96976e+12	22.854	brooks	Floor	surface	low	wipe	48 or entire surface	NICU	pooled	Pittsburgh	Illumina HiSeq 4000
SRR5420284	0.96246	0.965628	1.05703e+10	0.99967	2.74671e+09	18.3005	brooks	Sink basin	sink	sink	sink	NA	NICU	pooled	Pittsburgh	Illumina HiSeq 4000
SRR5420285	0.71436	0.735297	4.64878e+09	0.992917	2.69539e+11	18.7012	brooks	Monitor	surface	high	swab	NA	NICU	pooled	Pittsburgh	Illumina HiSeq 4000
SRR5420286	0.8282	0.841716	7.81432e+09	0.998055	4.38395e+10	20.7748	brooks	Isolette top	surface	low	wipe	48 or entire surface	NICU	pooled	Pittsburgh	Illumina HiSeq 4000
SRR5420287	0.95715	0.960757	7.86091e+09	0.99986	3.29318e+09	18.1855	brooks	Sink basin	sink	sink	sink	NA	NICU	pooled	Pittsburgh	Illumina HiSeq 4000
SRR5420288	0.69252	0.71472	4.73605e+08	0.999056	9.36424e+09	18.0042	brooks	Counter	surface	high	swab	NA	NICU	pooled	Pittsburgh	Illumina HiSeq 4000
SRR5420289	0.96289	0.966022	2.85442e+09	0.998436	2.79303e+09	18.7582	brooks	Isolette top	surface	low	wipe	48 or entire surface	NICU	pooled	Pittsburgh	Illumina HiSeq 4000
SRR5420290	0.95474	0.958545	1.03997e+10	0.999324	3.20849e+09	18.185	brooks	Sink basin	sink	sink	sink	NA	NICU	pooled	Pittsburgh	Illumina HiSeq 4000
SRR5420291	0.88231	0.891849	2.8529e+09	0.996119	9.38149e+09	17.054	brooks	Hand rail	surface	high	swab	NA	NICU	pooled	Pittsburgh	Illumina HiSeq 4000
SRR5420292	0.87897	0.888762	2.30149e+09	0.998855	6.58929e+09	19.3735	brooks	Isolette top	surface	low	wipe	48 or entire surface	NICU	pooled	Pittsburgh	Illumina HiSeq 4000
SRR5420293	0.97037	0.97288	1.07357e+10	0.999799	2.15173e+09	18.0004	brooks	Sink basin	sink	sink	sink	NA	NICU	pooled	Pittsburgh	Illumina HiSeq 4000
SRR5420294	0.95472	0.958527	1.04713e+10	0.999629	1.95158e+09	18.0139	brooks	Cellphone	surface	high	swab	NA	NICU	pooled	Pittsburgh	Illumina HiSeq 4000
SRR5420295	0.23607	0.267229	4.9956e+08	0.998738	2.44371e+11	21.3959	brooks	Floor	surface	low	wipe	48 or entire surface	NICU	pooled	Pittsburgh	Illumina HiSeq 4000
SRR5420296	0.97149	0.973906	1.46074e+10	0.999779	2.70303e+09	17.8627	brooks	Sink basin	sink	sink	sink	NA	NICU	pooled	Pittsburgh	Illumina HiSeq 4000
SRR5240530	0.82912	0.842571	6.15038e+07	0.936686	1.06813e+07	8.70349	ohara	Steering wheel/driver controls	surface	high	swab	NA	Ambulance	N	w_coast	Illumina HiSeq 2500	did not mention pooling; assigned as N
SRR5240493	0.84869	0.860732	2.76117e+08	0.962659	1.12724e+09	10.8333	ohara	Computer	surface	high	swab	NA	Ambulance	N	w_coast	Illumina HiSeq 2500	did not mention pooling; assigned as N
SRR5240547	0.72825	0.748355	1.58876e+08	0.938822	3.86254e+11	11.2708	ohara	Rear lights/control panel	surface	high	swab	NA	Ambulance	N	w_coast	Illumina HiSeq 2500	did not mention pooling; assigned as N
SRR5240559	0.5944	0.621557	1.65606e+08	0.8957	1.99165e+12	11.6607	ohara	Stretcher	surface	high	swab	NA	Ambulance	N	w_coast	Illumina HiSeq 2500	did not mention pooling; assigned as N
SRR5240309	0.59554	0.622647	1.53577e+08	0.908732	1.58755e+13	11.9591	ohara	Stethoscope	surface	high	swab	NA	Ambulance	N	s_w_w_coast	Illumina HiSeq 2500	did not mention pooling; assigned as N
SRR5240371	0.55713	0.585833	1.7212e+08	0.93448	1994063779275560	13.8118	ohara	Computer	surface	high	swab	NA	Ambulance	N	s_w_w_coast	Illumina HiSeq 2500	did not mention pooling; assigned as N
SRR5240563	0.94788	0.952247	2.70498e+08	0.99775	3.36705e+07	14.7408	ohara	Rear cabinets/counters	surface	high	swab	NA	Ambulance	N	w_coast	Illumina HiSeq 2500	did not mention pooling; assigned as N
SRR5240523	0.92298	0.929355	3.32322e+08	0.997795	5.50412e+07	14.8647	ohara	Rear lights/control panel	surface	high	swab	NA	Ambulance	N	w_coast	Illumina HiSeq 2500	did not mention pooling; assigned as N
SRR5240527	0.99981	0.999826	5.28502e+08	0.996673	3.62061e+07	14.9256	ohara	Rear handles/rails	surface	high	swab	NA	Ambulance	N	w_coast	Illumina HiSeq 2500	did not mention pooling; assigned as N
SRR5240412	0.99981	0.999826	4.26182e+08	0.996593	3.61004e+07	14.9514	ohara	Rear cabinets/counters	surface	high	swab	NA	Ambulance	N	w	Illumina HiSeq 2500	did not mention pooling; assigned as N
SRR5240535	0.99552	0.995904	4.79889e+08	0.996753	3.58335e+07	14.9614	ohara	Rear handles/rails	surface	high	swab	NA	Ambulance	N	w_coast	Illumina HiSeq 2500	did not mention pooling; assigned as N
SRR5240593	0.98555	0.986783	5.05526e+08	0.997641	5.16653e+07	14.9746	ohara	Rear lights/control panel	surface	high	swab	NA	Ambulance	N	w_coast	Illumina HiSeq 2500	did not mention pooling; assigned as N
SRR5240567	0.99619	0.996517	3.07932e+08	0.996763	3.76289e+07	14.9796	ohara	Front handle	surface	high	swab	NA	Ambulance	N	w_coast	Illumina HiSeq 2500	did not mention pooling; assigned as N
SRR5240496	0.97943	0.98118	1.9005e+08	0.997005	4.27223e+07	15.0188	ohara	Computer	surface	high	swab	NA	Ambulance	N	w_coast	Illumina HiSeq 2500	did not mention pooling; assigned as N
SRR5240293	0.97666	0.978643	2.6986e+08	0.996677	4.36053e+07	15.0297	ohara	Stethoscope	surface	high	swab	NA	Ambulance	N	s_w_w_coast	Illumina HiSeq 2500	did not mention pooling; assigned as N
SRR5240555	0.96214	0.965334	5.33672e+08	0.993241	6.57045e+07	15.0669	ohara	Rear cabinets/counters	surface	high	swab	NA	Ambulance	N	w_coast	Illumina HiSeq 2500	did not mention pooling; assigned as N
SRR5240655	0.95518	0.958949	1.0135e+09	0.997699	4.39982e+07	15.0809	ohara	Suction oxygen	surface	high	swab	NA	Ambulance	N	s_e	Illumina HiSeq 2500	did not mention pooling; assigned as N
SRR5240399	0.99771	0.997906	2.87922e+08	0.99637	5.02105e+07	15.1183	ohara	Rear handles/rails	surface	high	swab	NA	Ambulance	N	w	Illumina HiSeq 2500	did not mention pooling; assigned as N
SRR5240499	0.97182	0.974209	2.76053e+08	0.99717	4.35384e+07	15.1278	ohara	Suction oxygen	surface	high	swab	NA	Ambulance	N	w_coast	Illumina HiSeq 2500	did not mention pooling; assigned as N
SRR5240391	0.98325	0.984677	4.39463e+08	0.996722	4.64757e+07	15.1387	ohara	Rear lights/control panel	surface	high	swab	NA	Ambulance	N	s_w_w_coast	Illumina HiSeq 2500	did not mention pooling; assigned as N
SRR5240355	0.97055	0.973045	4.16091e+08	0.99766	4.98894e+07	15.1697	ohara	Pulse oxymeter	surface	high	swab	NA	Ambulance	N	w	Illumina HiSeq 2500	did not mention pooling; assigned as N
SRR5240503	0.95759	0.96116	3.79708e+08	0.99744	4.97307e+07	15.1756	ohara	Stretcher	surface	high	swab	NA	Ambulance	N	w_coast	Illumina HiSeq 2500	did not mention pooling; assigned as N
SRR5240516	0.83562	0.848607	2.74805e+08	0.991165	1.92047e+08	15.2196	ohara	Rear lights/control panel	surface	high	swab	NA	Ambulance	N	w_coast	Illumina HiSeq 2500	did not mention pooling; assigned as N
SRR5240483	0.99193	0.99262	5.67279e+08	0.998493	5.91946e+07	15.245	ohara	Rear handles/rails	surface	high	swab	NA	Ambulance	N	w	Illumina HiSeq 2500	did not mention pooling; assigned as N
SRR5240636	0.97376	0.975986	3.73246e+08	0.99827	5.80467e+07	15.2571	ohara	Rear handles/rails	surface	high	swab	NA	Ambulance	N	s_w_w_coast	Illumina HiSeq 2500	did not mention pooling; assigned as N
SRR5240684	0.96206	0.965261	3.47793e+08	0.997815	5.33856e+07	15.2851	ohara	Computer	surface	high	swab	NA	Ambulance	N	e_coast	Illumina HiSeq 2500	did not mention pooling; assigned as N
SRR5240507	0.99562	0.995995	6.28993e+08	0.998957	6.54106e+07	15.3015	ohara	Rear lights/control panel	surface	high	swab	NA	Ambulance	N	w_coast	Illumina HiSeq 2500	did not mention pooling; assigned as N
SRR5240327	0.91031	0.917686	2.98386e+08	0.998726	6.85571e+07	15.3026	ohara	Computer	surface	high	swab	NA	Ambulance	N	s_w_w_coast	Illumina HiSeq 2500	did not mention pooling; assigned as N
SRR5240669	0.98842	0.989409	5.25051e+08	0.998336	6.51584e+07	15.3064	ohara	Computer	surface	high	swab	NA	Ambulance	N	s_e	Illumina HiSeq 2500	did not mention pooling; assigned as N
SRR5240514	0.95627	0.959949	1.77554e+08	0.998513	6.31284e+07	15.3349	ohara	Front handle	surface	high	swab	NA	Ambulance	N	w_coast	Illumina HiSeq 2500	did not mention pooling; assigned as N
SRR5240497	0.95967	0.963069	4.82341e+08	0.998786	1.20442e+08	15.3866	ohara	Computer	surface	high	swab	NA	Ambulance	N	w_coast	Illumina HiSeq 2500	did not mention pooling; assigned as N
SRR5240569	0.99466	0.995117	4.7365e+08	0.998355	6.76482e+07	15.3892	ohara	Rear lights/control panel	surface	high	swab	NA	Ambulance	N	w_coast	Illumina HiSeq 2500	did not mention pooling; assigned as N
SRR5240491	0.93462	0.940063	3.35438e+08	0.998818	6.88763e+07	15.3921	ohara	Computer	surface	high	swab	NA	Ambulance	N	w_coast	Illumina HiSeq 2500	did not mention pooling; assigned as N
SRR5240369	0.9535	0.957407	4.2292e+08	0.998942	7.84453e+07	15.4024	ohara	Rear bench/seats	surface	high	swab	NA	Ambulance	N	s_w_w_coast	Illumina HiSeq 2500	did not mention pooling; assigned as N
SRR5240456	0.93792	0.943097	3.83168e+08	0.998548	8.22753e+07	15.4059	ohara	Steering wheel/driver controls	surface	high	swab	NA	Ambulance	N	w	Illumina HiSeq 2500	did not mention pooling; assigned as N
SRR5240582	0.97036	0.972871	5.61242e+08	0.998745	6.70414e+07	15.4129	ohara	Stretcher	surface	high	swab	NA	Ambulance	N	w_coast	Illumina HiSeq 2500	did not mention pooling; assigned as N
SRR5240595	0.95183	0.955874	3.82412e+08	0.997809	6.73401e+07	15.4152	ohara	Rear cabinets/counters	surface	high	swab	NA	Ambulance	N	w_coast	Illumina HiSeq 2500	did not mention pooling; assigned as N
SRR5240417	0.98441	0.985739	7.03017e+08	0.998311	6.58778e+07	15.4181	ohara	Front handle	surface	high	swab	NA	Ambulance	N	w	Illumina HiSeq 2500	did not mention pooling; assigned as N
SRR5240306	0.99297	0.993572	5.38312e+08	0.998835	7.45869e+07	15.4195	ohara	Stethoscope	surface	high	swab	NA	Ambulance	N	s_w_w_coast	Illumina HiSeq 2500	did not mention pooling; assigned as N
SRR5240432	0.98594	0.98714	4.78583e+08	0.997905	6.34568e+07	15.4214	ohara	Rear handles/rails	surface	high	swab	NA	Ambulance	N	w	Illumina HiSeq 2500	did not mention pooling; assigned as N
SRR5240424	0.99974	0.999762	5.23358e+08	0.99766	6.49651e+07	15.4231	ohara	Stretcher	surface	high	swab	NA	Ambulance	N	w	Illumina HiSeq 2500	did not mention pooling; assigned as N
SRR5240337	0.98365	0.985044	3.97185e+08	0.997602	6.35105e+07	15.4382	ohara	Steering wheel/driver controls	surface	high	swab	NA	Ambulance	N	s_w_w_coast	Illumina HiSeq 2500	did not mention pooling; assigned as N
SRR5240648	0.97111	0.973558	4.22315e+08	0.998982	8.46211e+07	15.4418	ohara	Stethoscope	surface	high	swab	NA	Ambulance	N	s_e	Illumina HiSeq 2500	did not mention pooling; assigned as N
SRR5240575	0.96711	0.969892	3.66583e+08	0.998903	7.67785e+07	15.4443	ohara	Front handle	surface	high	swab	NA	Ambulance	N	w_coast	Illumina HiSeq 2500	did not mention pooling; assigned as N
SRR5240554	0.91217	0.9194	3.27143e+08	0.997869	9.48344e+07	15.4684	ohara	Suction oxygen	surface	high	swab	NA	Ambulance	N	w_coast	Illumina HiSeq 2500	did not mention pooling; assigned as N
SRR5240679	0.97795	0.979824	3.97143e+08	0.998589	8.2038e+07	15.4935	ohara	Computer	surface	high	swab	NA	Ambulance	N	s_e	Illumina HiSeq 2500	did not mention pooling; assigned as N
SRR5240349	0.99298	0.993581	3.21927e+08	0.996999	6.81771e+07	15.5064	ohara	Stethoscope	surface	high	swab	NA	Ambulance	N	s_w_w_coast	Illumina HiSeq 2500	did not mention pooling; assigned as N
SRR5240383	0.9814	0.982984	7.85564e+08	0.998919	8.18316e+07	15.5334	ohara	Suction oxygen	surface	high	swab	NA	Ambulance	N	s_w_w_coast	Illumina HiSeq 2500	did not mention pooling; assigned as N
SRR5240457	0.98234	0.983844	3.67178e+08	0.99749	7.68759e+07	15.5429	ohara	Rear lights/control panel	surface	high	swab	NA	Ambulance	N	w	Illumina HiSeq 2500	did not mention pooling; assigned as N
SRR5240416	0.98426	0.985602	6.72388e+08	0.998052	2.42302e+08	15.5539	ohara	Computer	surface	high	swab	NA	Ambulance	N	w	Illumina HiSeq 2500	did not mention pooling; assigned as N
SRR5240524	0.94718	0.951605	2.99384e+08	0.999341	1.2742e+08	15.5551	ohara	Suction oxygen	surface	high	swab	NA	Ambulance	N	w_coast	Illumina HiSeq 2500	did not mention pooling; assigned as N
SRR5240649	0.92183	0.928296	3.99343e+08	0.998774	1.29363e+08	15.5559	ohara	Stethoscope	surface	high	swab	NA	Ambulance	N	s_e	Illumina HiSeq 2500	did not mention pooling; assigned as N
SRR5240388	0.97952	0.981262	6.77595e+08	0.998547	8.39093e+07	15.5652	ohara	Computer	surface	high	swab	NA	Ambulance	N	s_w_w_coast	Illumina HiSeq 2500	did not mention pooling; assigned as N
SRR5240323	0.98659	0.987735	3.02744e+08	0.996803	9.38905e+07	15.5682	ohara	Computer	surface	high	swab	NA	Ambulance	N	s_w_w_coast	Illumina HiSeq 2500	did not mention pooling; assigned as N
SRR5240400	0.99693	0.997193	6.57945e+08	0.99726	7.54602e+07	15.5752	ohara	Stretcher	surface	high	swab	NA	Ambulance	N	w	Illumina HiSeq 2500	did not mention pooling; assigned as N
SRR5240407	0.92632	0.932429	3.39483e+08	0.998296	1.22907e+08	15.5869	ohara	Stretcher	surface	high	swab	NA	Ambulance	N	w	Illumina HiSeq 2500	did not mention pooling; assigned as N
SRR5240517	0.98933	0.990242	4.90945e+08	0.998163	8.61427e+07	15.5869	ohara	Suction oxygen	surface	high	swab	NA	Ambulance	N	w_coast	Illumina HiSeq 2500	did not mention pooling; assigned as N
SRR5240525	0.97596	0.978002	3.55854e+08	0.997827	9.088e+07	15.5984	ohara	Rear cabinets/counters	surface	high	swab	NA	Ambulance	N	w_coast	Illumina HiSeq 2500	did not mention pooling; assigned as N
SRR5240427	0.9539	0.957774	3.5579e+08	0.998879	9.51784e+07	15.6151	ohara	Steering wheel/driver controls	surface	high	swab	NA	Ambulance	N	w	Illumina HiSeq 2500	did not mention pooling; assigned as N
SRR5240495	0.97648	0.978478	4.63825e+08	0.99871	8.9477e+07	15.6344	ohara	Computer	surface	high	swab	NA	Ambulance	N	w_coast	Illumina HiSeq 2500	did not mention pooling; assigned as N
SRR5240668	0.95058	0.954727	1.05296e+09	0.998438	9.37067e+07	15.6596	ohara	Stretcher	surface	high	swab	NA	Ambulance	N	s_e	Illumina HiSeq 2500	did not mention pooling; assigned as N
SRR5240464	0.9719	0.974282	4.21038e+08	0.998387	8.46803e+07	15.6606	ohara	Front handle	surface	high	swab	NA	Ambulance	N	w	Illumina HiSeq 2500	did not mention pooling; assigned as N
SRR5240434	0.93818	0.943336	3.31596e+08	0.99877	9.79484e+07	15.6632	ohara	Computer	surface	high	swab	NA	Ambulance	N	w	Illumina HiSeq 2500	did not mention pooling; assigned as N
SRR5240551	0.97386	0.976078	3.49097e+08	0.998707	9.92188e+07	15.6639	ohara	Rear handles/rails	surface	high	swab	NA	Ambulance	N	w_coast	Illumina HiSeq 2500	did not mention pooling; assigned as N
SRR5240484	0.91168	0.918949	2.87224e+08	0.998943	1.02449e+08	15.6654	ohara	Steering wheel/driver controls	surface	high	swab	NA	Ambulance	N	w	Illumina HiSeq 2500	did not mention pooling; assigned as N
SRR5240501	0.95253	0.956517	3.51878e+08	0.998716	9.56371e+07	15.6707	ohara	Rear bench/seats	surface	high	swab	NA	Ambulance	N	w_coast	Illumina HiSeq 2500	did not mention pooling; assigned as N
SRR5240558	0.70853	0.72981	1.1252e+08	0.980722	1.97107e+10	15.6747	ohara	Rear handles/rails	surface	high	swab	NA	Ambulance	N	w_coast	Illumina HiSeq 2500	did not mention pooling; assigned as N
SRR5240393	0.94944	0.95368	3.71583e+08	0.99906	1.02423e+08	15.6769	ohara	Computer	surface	high	swab	NA	Ambulance	N	s_w_w_coast	Illumina HiSeq 2500	did not mention pooling; assigned as N
SRR5240480	0.97512	0.977232	4.13806e+08	0.998964	1.03375e+08	15.677	ohara	Steering wheel/driver controls	surface	high	swab	NA	Ambulance	N	w	Illumina HiSeq 2500	did not mention pooling; assigned as N
SRR5240344	0.98281	0.984275	3.34128e+08	0.997936	9.10036e+07	15.6788	ohara	Stethoscope	surface	high	swab	NA	Ambulance	N	s_w_w_coast	Illumina HiSeq 2500	did not mention pooling; assigned as N
SRR5240686	0.93978	0.944806	2.28455e+08	0.999237	1.22013e+08	15.6871	ohara	Computer	surface	high	swab	NA	Ambulance	N	e_coast	Illumina HiSeq 2500	did not mention pooling; assigned as N
SRR5240536	0.96974	0.972302	3.38595e+08	0.998802	1.05691e+08	15.6962	ohara	Stretcher	surface	high	swab	NA	Ambulance	N	w_coast	Illumina HiSeq 2500	did not mention pooling; assigned as N
SRR5240675	0.99819	0.998345	5.55585e+08	0.998533	1.02698e+08	15.7044	ohara	Computer	surface	high	swab	NA	Ambulance	N	s_e	Illumina HiSeq 2500	did not mention pooling; assigned as N
SRR5240676	0.97276	0.97507	5.15576e+08	0.998054	9.75071e+07	15.7262	ohara	Computer	surface	high	swab	NA	Ambulance	N	s_e	Illumina HiSeq 2500	did not mention pooling; assigned as N
SRR5240333	0.90661	0.914276	4.25971e+08	0.998076	2.2618e+08	15.7278	ohara	Rear cabinets/counters	surface	high	swab	NA	Ambulance	N	s_w_w_coast	Illumina HiSeq 2500	did not mention pooling; assigned as N
SRR5240487	0.69279	0.714975	2.52815e+07	0.997665	3.32632e+08	15.7362	ohara	Computer	surface	high	swab	NA	Ambulance	N	w_coast	Illumina HiSeq 2500	did not mention pooling; assigned as N
SRR5240348	0.95237	0.95637	4.32332e+08	0.999015	1.15863e+08	15.7414	ohara	Stethoscope	surface	high	swab	NA	Ambulance	N	s_w_w_coast	Illumina HiSeq 2500	did not mention pooling; assigned as N
SRR5240545	0.9938	0.994331	7.18865e+08	0.997413	9.83683e+07	15.7477	ohara	Front handle	surface	high	swab	NA	Ambulance	N	w_coast	Illumina HiSeq 2500	did not mention pooling; assigned as N
SRR5240442	0.95636	0.960032	4.83457e+08	0.99902	1.0601e+08	15.7521	ohara	Steering wheel/driver controls	surface	high	swab	NA	Ambulance	N	w	Illumina HiSeq 2500	did not mention pooling; assigned as N
SRR5240627	0.96393	0.966976	4.23073e+08	0.999165	1.30574e+08	15.753	ohara	Front handle	surface	high	swab	NA	Ambulance	N	s_w_w_coast	Illumina HiSeq 2500	did not mention pooling; assigned as N
SRR5240654	0.95509	0.958866	1.25851e+09	0.998454	1.08593e+08	15.756	ohara	Rear lights/control panel	surface	high	swab	NA	Ambulance	N	s_e	Illumina HiSeq 2500	did not mention pooling; assigned as N
SRR5240345	0.99248	0.993124	6.66827e+08	0.998133	1.05296e+08	15.76	ohara	Stethoscope	surface	high	swab	NA	Ambulance	N	s_w_w_coast	Illumina HiSeq 2500	did not mention pooling; assigned as N
SRR5240474	0.97202	0.974392	6.07228e+08	0.997247	8.71125e+07	15.7601	ohara	Rear lights/control panel	surface	high	swab	NA	Ambulance	N	w	Illumina HiSeq 2500	did not mention pooling; assigned as N
SRR5240557	0.95022	0.954396	3.46494e+08	0.999152	1.17273e+08	15.7649	ohara	Rear bench/seats	surface	high	swab	NA	Ambulance	N	w_coast	Illumina HiSeq 2500	did not mention pooling; assigned as N
SRR5240419	0.9449	0.94951	2.28479e+08	0.998921	1.08003e+08	15.7659	ohara	Rear lights/control panel	surface	high	swab	NA	Ambulance	N	w	Illumina HiSeq 2500	did not mention pooling; assigned as N
SRR5240463	0.95627	0.959949	3.5822e+08	0.995707	1.38482e+08	15.7669	ohara	Computer	surface	high	swab	NA	Ambulance	N	w	Illumina HiSeq 2500	did not mention pooling; assigned as N
SRR5240437	0.94594	0.950466	3.79012e+08	0.998613	1.01153e+08	15.7779	ohara	Rear lights/control panel	surface	high	swab	NA	Ambulance	N	w	Illumina HiSeq 2500	did not mention pooling; assigned as N
SRR5240635	0.97007	0.972605	5.1554e+08	0.999174	1.31019e+08	15.7806	ohara	Rear cabinets/counters	surface	high	swab	NA	Ambulance	N	s_w_w_coast	Illumina HiSeq 2500	did not mention pooling; assigned as N
SRR5240396	0.97475	0.976893	6.54796e+08	0.999011	1.20176e+08	15.7831	ohara	Suction oxygen	surface	high	swab	NA	Ambulance	N	w	Illumina HiSeq 2500	did not mention pooling; assigned as N
SRR5240320	0.94532	0.949896	4.12426e+08	0.999335	1.46093e+08	15.7953	ohara	Computer	surface	high	swab	NA	Ambulance	N	s_w_w_coast	Illumina HiSeq 2500	did not mention pooling; assigned as N
SRR5240328	0.98072	0.982361	3.7538e+08	0.998673	1.07876e+08	15.8006	ohara	Computer	surface	high	swab	NA	Ambulance	N	s_w_w_coast	Illumina HiSeq 2500	did not mention pooling; assigned as N
SRR5240426	0.95309	0.957031	7.01785e+08	0.998838	1.75319e+08	15.8066	ohara	Front handle	surface	high	swab	NA	Ambulance	N	w	Illumina HiSeq 2500	did not mention pooling; assigned as N
SRR5240541	0.95557	0.959307	2.68737e+08	0.998366	1.01624e+08	15.8077	ohara	Rear cabinets/counters	surface	high	swab	NA	Ambulance	N	w_coast	Illumina HiSeq 2500	did not mention pooling; assigned as N
SRR5240296	0.95406	0.957921	3.5496e+08	0.999245	1.33106e+08	15.8265	ohara	Stethoscope	surface	high	swab	NA	Ambulance	N	s_w_w_coast	Illumina HiSeq 2500	did not mention pooling; assigned as N
SRR5240352	0.94605	0.950567	5.1242e+08	0.998893	2.01e+08	15.8281	ohara	Monitor	surface	high	swab	NA	Ambulance	N	w	Illumina HiSeq 2500	did not mention pooling; assigned as N
SRR5240471	0.97631	0.978322	3.84798e+08	0.998885	1.1658e+08	15.8294	ohara	Stretcher	surface	high	swab	NA	Ambulance	N	w	Illumina HiSeq 2500	did not mention pooling; assigned as N
SRR5240324	0.96111	0.96439	2.92095e+08	0.998818	1.27269e+08	15.8306	ohara	Computer	surface	high	swab	NA	Ambulance	N	s_w_w_coast	Illumina HiSeq 2500	did not mention pooling; assigned as N
SRR5240637	0.98613	0.987314	3.57766e+08	0.998631	1.18755e+08	15.8512	ohara	Stretcher	surface	high	swab	NA	Ambulance	N	s_w_w_coast	Illumina HiSeq 2500	did not mention pooling; assigned as N
SRR5240651	0.91438	0.921436	4.16219e+08	0.998445	2.17754e+08	15.8519	ohara	Stethoscope	surface	high	swab	NA	Ambulance	N	s_e	Illumina HiSeq 2500	did not mention pooling; assigned as N
SRR5240374	0.98207	0.983597	5.56015e+08	0.999092	1.36169e+08	15.8528	ohara	Suction oxygen	surface	high	swab	NA	Ambulance	N	s_w_w_coast	Illumina HiSeq 2500	did not mention pooling; assigned as N
SRR5240358	0.92493	0.93115	4.00504e+08	0.998994	1.33492e+08	15.8622	ohara	AED	surface	high	swab	NA	Ambulance	N	w	Illumina HiSeq 2500	did not mention pooling; assigned as N
SRR5240537	0.9493	0.953551	3.9267e+08	0.999091	1.25331e+08	15.8698	ohara	Front handle	surface	high	swab	NA	Ambulance	N	w_coast	Illumina HiSeq 2500	did not mention pooling; assigned as N
SRR5240425	0.98254	0.984027	5.21176e+08	0.997112	9.78297e+07	15.8712	ohara	Computer	surface	high	swab	NA	Ambulance	N	w	Illumina HiSeq 2500	did not mention pooling; assigned as N
SRR5240510	0.93038	0.936164	4.00779e+08	0.999187	1.56975e+08	15.8763	ohara	Rear bench/seats	surface	high	swab	NA	Ambulance	N	w_coast	Illumina HiSeq 2500	did not mention pooling; assigned as N
SRR5240307	0.97119	0.973631	4.22251e+08	0.997443	9.80992e+07	15.88	ohara	Stethoscope	surface	high	swab	NA	Ambulance	N	s_w_w_coast	Illumina HiSeq 2500	did not mention pooling; assigned as N
SRR5240479	0.95767	0.961234	4.80567e+08	0.998839	1.62129e+08	15.8834	ohara	Stretcher	surface	high	swab	NA	Ambulance	N	w	Illumina HiSeq 2500	did not mention pooling; assigned as N
SRR5240343	0.939	0.944089	3.67748e+08	0.998098	9.96446e+07	15.8883	ohara	Stethoscope	surface	high	swab	NA	Ambulance	N	s_w_w_coast	Illumina HiSeq 2500	did not mention pooling; assigned as N
SRR5240305	0.96418	0.967205	5.62235e+08	0.998941	1.42937e+08	15.8969	ohara	Stethoscope	surface	high	swab	NA	Ambulance	N	s_w_w_coast	Illumina HiSeq 2500	did not mention pooling; assigned as N
SRR5240506	0.98348	0.984888	3.92291e+08	0.997152	9.80408e+07	15.9006	ohara	Steering wheel/driver controls	surface	high	swab	NA	Ambulance	N	w_coast	Illumina HiSeq 2500	did not mention pooling; assigned as N
SRR5240532	0.96874	0.971386	4.02857e+08	0.99928	1.42051e+08	15.9011	ohara	Suction oxygen	surface	high	swab	NA	Ambulance	N	w_coast	Illumina HiSeq 2500	did not mention pooling; assigned as N
SRR5240441	0.9754	0.977489	4.24375e+08	0.99795	1.16355e+08	15.9067	ohara	Front handle	surface	high	swab	NA	Ambulance	N	w	Illumina HiSeq 2500	did not mention pooling; assigned as N
SRR5240475	0.94579	0.950328	4.1733e+08	0.999106	1.5045e+08	15.9086	ohara	Suction oxygen	surface	high	swab	NA	Ambulance	N	w	Illumina HiSeq 2500	did not mention pooling; assigned as N
SRR5240466	0.96787	0.970588	3.70028e+08	0.997379	1.0795e+08	15.9101	ohara	Rear lights/control panel	surface	high	swab	NA	Ambulance	N	w	Illumina HiSeq 2500	did not mention pooling; assigned as N
SRR5240546	0.8857	0.894981	2.58e+08	0.9983	3.0334e+08	15.9142	ohara	Steering wheel/driver controls	surface	high	swab	NA	Ambulance	N	w_coast	Illumina HiSeq 2500	did not mention pooling; assigned as N
SRR5240397	0.95282	0.956783	3.83044e+08	0.998873	1.35834e+08	15.9168	ohara	Rear cabinets/counters	surface	high	swab	NA	Ambulance	N	w	Illumina HiSeq 2500	did not mention pooling; assigned as N
SRR5240502	0.96245	0.965619	3.36621e+08	0.999288	1.56882e+08	15.9217	ohara	Rear handles/rails	surface	high	swab	NA	Ambulance	N	w_coast	Illumina HiSeq 2500	did not mention pooling; assigned as N
SRR5240455	0.96161	0.964848	4.57622e+08	0.999269	1.51788e+08	15.9233	ohara	Front handle	surface	high	swab	NA	Ambulance	N	w	Illumina HiSeq 2500	did not mention pooling; assigned as N
SRR5240438	0.94978	0.953992	4.03536e+08	0.998604	1.26692e+08	15.9289	ohara	Suction oxygen	surface	high	swab	NA	Ambulance	N	w	Illumina HiSeq 2500	did not mention pooling; assigned as N
SRR5240630	0.93314	0.938702	3.3002e+08	0.99923	1.6809e+08	15.9342	ohara	Computer	surface	high	swab	NA	Ambulance	N	s_w_w_coast	Illumina HiSeq 2500	did not mention pooling; assigned as N
SRR5240335	0.97285	0.975152	4.84199e+08	0.998396	1.29659e+08	15.9415	ohara	Rear handles/rails	surface	high	swab	NA	Ambulance	N	s_w_w_coast	Illumina HiSeq 2500	did not mention pooling; assigned as N
SRR5240650	0.94288	0.947655	3.60054e+08	0.999041	1.4534e+08	15.9428	ohara	Stethoscope	surface	high	swab	NA	Ambulance	N	s_e	Illumina HiSeq 2500	did not mention pooling; assigned as N
SRR5240450	0.92462	0.930864	6.33684e+08	0.997831	1.90866e+08	15.9433	ohara	Rear lights/control panel	surface	high	swab	NA	Ambulance	N	w	Illumina HiSeq 2500	did not mention pooling; assigned as N
SRR5240299	0.98854	0.989519	5.92201e+08	0.99906	1.45715e+08	15.9524	ohara	Stethoscope	surface	high	swab	NA	Ambulance	N	s_w_w_coast	Illumina HiSeq 2500	did not mention pooling; assigned as N
SRR5240414	0.97544	0.977525	6.12903e+08	0.999356	1.6328e+08	15.9535	ohara	Rear handles/rails	surface	high	swab	NA	Ambulance	N	w	Illumina HiSeq 2500	did not mention pooling; assigned as N
SRR5240667	0.95517	0.95894	7.91509e+08	0.998967	1.416e+08	15.9545	ohara	Rear handles/rails	surface	high	swab	NA	Ambulance	N	s_e	Illumina HiSeq 2500	did not mention pooling; assigned as N
SRR5240462	0.97563	0.977699	6.08241e+08	0.998854	1.28191e+08	15.957	ohara	Stretcher	surface	high	swab	NA	Ambulance	N	w	Illumina HiSeq 2500	did not mention pooling; assigned as N
SRR5240538	0.9636	0.966673	3.61472e+08	0.99872	1.36749e+08	15.9626	ohara	Steering wheel/driver controls	surface	high	swab	NA	Ambulance	N	w_coast	Illumina HiSeq 2500	did not mention pooling; assigned as N
SRR5240608	0.93964	0.944678	4.80942e+08	0.998598	1.7141e+08	15.9631	ohara	Front handle	surface	high	swab	NA	Ambulance	N	w_coast	Illumina HiSeq 2500	did not mention pooling; assigned as N
SRR5240539	0.81213	0.826774	2.24137e+08	0.995908	5.60633e+08	15.9632	ohara	Rear lights/control panel	surface	high	swab	NA	Ambulance	N	w_coast	Illumina HiSeq 2500	did not mention pooling; assigned as N
SRR5240632	0.92899	0.934885	2.67976e+08	0.999344	1.83666e+08	15.9635	ohara	Computer	surface	high	swab	NA	Ambulance	N	s_w_w_coast	Illumina HiSeq 2500	did not mention pooling; assigned as N
SRR5240513	0.97172	0.974117	4.42675e+08	0.99923	1.53964e+08	15.9707	ohara	Computer	surface	high	swab	NA	Ambulance	N	w_coast	Illumina HiSeq 2500	did not mention pooling; assigned as N
SRR5240677	0.97182	0.974209	4.04847e+08	0.999082	1.39215e+08	15.9754	ohara	Computer	surface	high	swab	NA	Ambulance	N	s_e	Illumina HiSeq 2500	did not mention pooling; assigned as N
SRR5240477	0.96317	0.966279	4.98412e+08	0.999355	2.08836e+08	15.9771	ohara	Rear bench/seats	surface	high	swab	NA	Ambulance	N	w	Illumina HiSeq 2500	did not mention pooling; assigned as N
SRR5240665	0.9511	0.955204	9.4393e+08	0.999423	1.92054e+08	15.9787	ohara	Front handle	surface	high	swab	NA	Ambulance	N	s_e	Illumina HiSeq 2500	did not mention pooling; assigned as N
SRR5240467	0.96887	0.971505	7.21317e+08	0.999145	1.60929e+08	15.9797	ohara	Suction oxygen	surface	high	swab	NA	Ambulance	N	w	Illumina HiSeq 2500	did not mention pooling; assigned as N
SRR5240478	0.98938	0.990288	4.34987e+08	0.998189	1.23648e+08	15.9829	ohara	Rear handles/rails	surface	high	swab	NA	Ambulance	N	w	Illumina HiSeq 2500	did not mention pooling; assigned as N
SRR5240562	0.98192	0.98346	4.24896e+08	0.998375	1.32931e+08	15.9945	ohara	Rear lights/control panel	surface	high	swab	NA	Ambulance	N	w_coast	Illumina HiSeq 2500	did not mention pooling; assigned as N
SRR5240308	0.96859	0.971248	5.30261e+08	0.999185	1.60928e+08	16.0098	ohara	Stethoscope	surface	high	swab	NA	Ambulance	N	s_w_w_coast	Illumina HiSeq 2500	did not mention pooling; assigned as N
SRR5240360	0.98661	0.987753	4.35702e+08	0.997364	1.39347e+08	16.0332	ohara	Stethoscope	surface	high	swab	NA	Ambulance	N	w_coast	Illumina HiSeq 2500	did not mention pooling; assigned as N
SRR5240612	0.9606	0.963922	3.98223e+08	0.998971	1.49614e+08	16.0374	ohara	Rear cabinets/counters	surface	high	swab	NA	Ambulance	N	s_w_w_coast	Illumina HiSeq 2500	did not mention pooling; assigned as N
SRR5240372	0.9405	0.945468	4.49058e+08	0.998207	1.17096e+08	16.0391	ohara	Front handle	surface	high	swab	NA	Ambulance	N	s_w_w_coast	Illumina HiSeq 2500	did not mention pooling; assigned as N
SRR5240449	0.96711	0.969892	3.65839e+08	0.999018	1.57536e+08	16.0464	ohara	Front handle	surface	high	swab	NA	Ambulance	N	w	Illumina HiSeq 2500	did not mention pooling; assigned as N
SRR5240590	0.99337	0.993938	7.58962e+08	0.998067	1.31473e+08	16.0479	ohara	Stretcher	surface	high	swab	NA	Ambulance	N	w_coast	Illumina HiSeq 2500	did not mention pooling; assigned as N
SRR5240421	0.98408	0.985437	4.04052e+08	0.997783	1.17391e+08	16.059	ohara	Rear cabinets/counters	surface	high	swab	NA	Ambulance	N	w	Illumina HiSeq 2500	did not mention pooling; assigned as N
SRR5240586	0.99333	0.993901	4.26125e+08	0.997722	1.26504e+08	16.0625	ohara	Suction oxygen	surface	high	swab	NA	Ambulance	N	w_coast	Illumina HiSeq 2500	did not mention pooling; assigned as N
SRR5240423	0.98636	0.987524	5.52975e+08	0.99776	1.26729e+08	16.0661	ohara	Rear handles/rails	surface	high	swab	NA	Ambulance	N	w	Illumina HiSeq 2500	did not mention pooling; assigned as N
SRR5240339	0.90424	0.912091	2.49423e+08	0.998995	1.49214e+08	16.0754	ohara	Computer	surface	high	swab	NA	Ambulance	N	s_w_w_coast	Illumina HiSeq 2500	did not mention pooling; assigned as N
SRR5240619	0.93827	0.943418	4.82776e+08	0.999248	2.30076e+08	16.0854	ohara	Computer	surface	high	swab	NA	Ambulance	N	s_w_w_coast	Illumina HiSeq 2500	did not mention pooling; assigned as N
SRR5240624	0.94406	0.948739	5.64252e+08	0.998923	3.84886e+08	16.0988	ohara	Rear cabinets/counters	surface	high	swab	NA	Ambulance	N	s_w_w_coast	Illumina HiSeq 2500	did not mention pooling; assigned as N
SRR5240336	0.95806	0.961592	3.95975e+08	0.99864	1.4215e+08	16.1072	ohara	Front handle	surface	high	swab	NA	Ambulance	N	s_w_w_coast	Illumina HiSeq 2500	did not mention pooling; assigned as N
SRR5240319	0.86473	0.875591	3.28926e+08	0.997272	3.79622e+08	16.1133	ohara	Computer	surface	high	swab	NA	Ambulance	N	s_w_w_coast	Illumina HiSeq 2500	did not mention pooling; assigned as N
SRR5240361	0.86104	0.872175	3.59356e+08	0.995779	4.8588e+08	16.1146	ohara	Monitor	surface	high	swab	NA	Ambulance	N	s_w_w_coast	Illumina HiSeq 2500	did not mention pooling; assigned as N
SRR5240410	0.97298	0.975272	6.15597e+08	0.998396	1.39423e+08	16.1156	ohara	Rear lights/control panel	surface	high	swab	NA	Ambulance	N	w	Illumina HiSeq 2500	did not mention pooling; assigned as N
SRR5240404	0.98687	0.987991	4.36792e+08	0.998364	1.46342e+08	16.1169	ohara	Rear cabinets/counters	surface	high	swab	NA	Ambulance	N	w	Illumina HiSeq 2500	did not mention pooling; assigned as N
SRR5240583	0.94646	0.950943	3.68144e+08	0.99895	1.68914e+08	16.1196	ohara	Front handle	surface	high	swab	NA	Ambulance	N	w_coast	Illumina HiSeq 2500	did not mention pooling; assigned as N
SRR5240618	0.95364	0.957536	5.43939e+08	0.999267	2.24371e+08	16.1228	ohara	Computer	surface	high	swab	NA	Ambulance	N	s_w_w_coast	Illumina HiSeq 2500	did not mention pooling; assigned as N
SRR5240552	0.92491	0.931131	5.00676e+08	0.998987	2.84495e+08	16.1321	ohara	Stretcher	surface	high	swab	NA	Ambulance	N	w_coast	Illumina HiSeq 2500	did not mention pooling; assigned as N
SRR5240318	0.90338	0.911298	3.3658e+08	0.999058	1.75306e+08	16.1448	ohara	Computer	surface	high	swab	NA	Ambulance	N	s_w_w_coast	Illumina HiSeq 2500	did not mention pooling; assigned as N
SRR5240603	0.97305	0.975336	3.04707e+08	0.998193	1.38349e+08	16.1555	ohara	Suction oxygen	surface	high	swab	NA	Ambulance	N	w_coast	Illumina HiSeq 2500	did not mention pooling; assigned as N
SRR5240515	0.97437	0.976545	3.46736e+08	0.999387	2.02137e+08	16.1563	ohara	Steering wheel/driver controls	surface	high	swab	NA	Ambulance	N	w_coast	Illumina HiSeq 2500	did not mention pooling; assigned as N
SRR5240682	0.98014	0.98183	5.58811e+08	0.997837	1.38005e+08	16.1678	ohara	Computer	surface	high	swab	NA	Ambulance	N	e_coast	Illumina HiSeq 2500	did not mention pooling; assigned as N
SRR5240326	0.91032	0.917695	3.92377e+08	0.99903	2.91005e+08	16.1686	ohara	Computer	surface	high	swab	NA	Ambulance	N	s_w_w_coast	Illumina HiSeq 2500	did not mention pooling; assigned as N
SRR5240444	0.98708	0.988183	3.27197e+08	0.997561	1.38489e+08	16.1692	ohara	Rear cabinets/counters	surface	high	swab	NA	Ambulance	N	w	Illumina HiSeq 2500	did not mention pooling; assigned as N
SRR5240505	0.89026	0.899192	3.26174e+08	0.998051	2.64076e+08	16.1703	ohara	Front handle	surface	high	swab	NA	Ambulance	N	w_coast	Illumina HiSeq 2500	did not mention pooling; assigned as N
SRR5240439	0.93797	0.943143	4.72085e+08	0.998881	1.57225e+08	16.1774	ohara	Rear handles/rails	surface	high	swab	NA	Ambulance	N	w	Illumina HiSeq 2500	did not mention pooling; assigned as N
SRR5240377	0.90846	0.915981	3.75277e+08	0.998771	2.86079e+08	16.1777	ohara	Rear handles/rails	surface	high	swab	NA	Ambulance	N	s_w_w_coast	Illumina HiSeq 2500	did not mention pooling; assigned as N
SRR5240498	0.90451	0.91234	2.32452e+08	0.999103	1.83406e+08	16.1903	ohara	Rear lights/control panel	surface	high	swab	NA	Ambulance	N	w_coast	Illumina HiSeq 2500	did not mention pooling; assigned as N
SRR5240581	0.93652	0.94181	1.03398e+09	0.997924	3.11286e+08	16.1905	ohara	Rear handles/rails	surface	high	swab	NA	Ambulance	N	w_coast	Illumina HiSeq 2500	did not mention pooling; assigned as N
SRR5240662	0.92726	0.933294	1.24361e+09	0.998146	3.09076e+08	16.1907	ohara	Front handle	surface	high	swab	NA	Ambulance	N	s_e	Illumina HiSeq 2500	did not mention pooling; assigned as N
SRR5240528	0.98214	0.983661	6.87264e+08	0.998075	1.41808e+08	16.192	ohara	Computer	surface	high	swab	NA	Ambulance	N	w_coast	Illumina HiSeq 2500	did not mention pooling; assigned as N
SRR5240440	0.87409	0.884251	3.62145e+08	0.999021	7.88893e+08	16.1931	ohara	Computer	surface	high	swab	NA	Ambulance	N	w	Illumina HiSeq 2500	did not mention pooling; assigned as N
SRR5240433	0.9543	0.958141	4.8014e+08	0.999132	1.89499e+08	16.1946	ohara	Stretcher	surface	high	swab	NA	Ambulance	N	w	Illumina HiSeq 2500	did not mention pooling; assigned as N
SRR5240295	0.92486	0.931085	3.13667e+08	0.999069	1.83209e+08	16.2	ohara	Stethoscope	surface	high	swab	NA	Ambulance	N	s_w_w_coast	Illumina HiSeq 2500	did not mention pooling; assigned as N
SRR5240644	0.8663	0.877044	2.33924e+08	0.998384	3.41781e+08	16.2064	ohara	Stethoscope	surface	high	swab	NA	Ambulance	N	s_e	Illumina HiSeq 2500	did not mention pooling; assigned as N
SRR5240409	0.94459	0.949226	2.86767e+08	0.998057	1.51727e+08	16.2108	ohara	Front handle	surface	high	swab	NA	Ambulance	N	w	Illumina HiSeq 2500	did not mention pooling; assigned as N
SRR5240476	0.98454	0.985858	5.59255e+08	0.998472	1.58717e+08	16.2157	ohara	Rear cabinets/counters	surface	high	swab	NA	Ambulance	N	w	Illumina HiSeq 2500	did not mention pooling; assigned as N
SRR5240465	0.93303	0.938601	3.35726e+08	0.999349	2.13504e+08	16.2366	ohara	Steering wheel/driver controls	surface	high	swab	NA	Ambulance	N	w	Illumina HiSeq 2500	did not mention pooling; assigned as N
SRR5240508	0.9186	0.925323	4.20981e+08	0.999245	2.62221e+08	16.2432	ohara	Suction oxygen	surface	high	swab	NA	Ambulance	N	w_coast	Illumina HiSeq 2500	did not mention pooling; assigned as N
SRR5240598	0.9574	0.960986	3.6099e+08	0.998959	2.02954e+08	16.2552	ohara	Stretcher	surface	high	swab	NA	Ambulance	N	w_coast	Illumina HiSeq 2500	did not mention pooling; assigned as N
SRR5240597	0.90997	0.917373	6.38533e+08	0.99785	4.58757e+08	16.2609	ohara	Rear handles/rails	surface	high	swab	NA	Ambulance	N	w_coast	Illumina HiSeq 2500	did not mention pooling; assigned as N
SRR5240606	0.89469	0.903281	3.5956e+08	0.998753	3.36173e+08	16.2623	ohara	Rear handles/rails	surface	high	swab	NA	Ambulance	N	w_coast	Illumina HiSeq 2500	did not mention pooling; assigned as N
SRR5240533	0.9384	0.943538	3.76259e+08	0.999283	2.28785e+08	16.265	ohara	Rear cabinets/counters	surface	high	swab	NA	Ambulance	N	w_coast	Illumina HiSeq 2500	did not mention pooling; assigned as N
SRR5240574	0.97486	0.976994	4.75152e+08	0.998565	1.74656e+08	16.2659	ohara	Stretcher	surface	high	swab	NA	Ambulance	N	w_coast	Illumina HiSeq 2500	did not mention pooling; assigned as N
SRR5240315	0.88664	0.895849	4.1077e+08	0.9981	5.03226e+08	16.287	ohara	Computer	surface	high	swab	NA	Ambulance	N	s_w_w_coast	Illumina HiSeq 2500	did not mention pooling; assigned as N
SRR5240653	0.93322	0.938776	3.6977e+08	0.998933	2.17629e+08	16.2969	ohara	Stethoscope	surface	high	swab	NA	Ambulance	N	s_e	Illumina HiSeq 2500	did not mention pooling; assigned as N
SRR5240591	0.84213	0.854649	4.32615e+08	0.995139	7.94787e+08	16.3017	ohara	Front handle	surface	high	swab	NA	Ambulance	N	w_coast	Illumina HiSeq 2500	did not mention pooling; assigned as N
SRR5240520	0.91884	0.925544	3.63902e+08	0.999592	3.16432e+08	16.3062	ohara	Stretcher	surface	high	swab	NA	Ambulance	N	w_coast	Illumina HiSeq 2500	did not mention pooling; assigned as N
SRR5240364	0.91316	0.920312	2.95032e+08	0.999296	2.56578e+08	16.3082	ohara	Computer	surface	high	swab	NA	Ambulance	N	s_w_w_coast	Illumina HiSeq 2500	did not mention pooling; assigned as N
SRR5240526	0.96746	0.970212	4.26921e+08	0.997517	2.05517e+08	16.3088	ohara	Rear bench/seats	surface	high	swab	NA	Ambulance	N	w_coast	Illumina HiSeq 2500	did not mention pooling; assigned as N
SRR5240670	0.94266	0.947453	3.97178e+08	0.999302	2.39549e+08	16.315	ohara	Computer	surface	high	swab	NA	Ambulance	N	s_e	Illumina HiSeq 2500	did not mention pooling; assigned as N
SRR5240673	0.91869	0.925405	2.86435e+08	0.999295	2.53464e+08	16.3355	ohara	Computer	surface	high	swab	NA	Ambulance	N	s_e	Illumina HiSeq 2500	did not mention pooling; assigned as N
SRR5240568	0.96119	0.964463	3.20487e+08	0.998844	1.95015e+08	16.336	ohara	Steering wheel/driver controls	surface	high	swab	NA	Ambulance	N	w_coast	Illumina HiSeq 2500	did not mention pooling; assigned as N
SRR5240346	0.99429	0.994779	4.35022e+08	0.998515	2.00212e+08	16.3414	ohara	Stethoscope	surface	high	swab	NA	Ambulance	N	s_w_w_coast	Illumina HiSeq 2500	did not mention pooling; assigned as N
SRR5240298	0.91949	0.926142	3.73573e+08	0.999155	2.18363e+08	16.3519	ohara	Stethoscope	surface	high	swab	NA	Ambulance	N	s_w_w_coast	Illumina HiSeq 2500	did not mention pooling; assigned as N
SRR5240561	0.90956	0.916995	3.44359e+08	0.99938	2.77201e+08	16.3526	ohara	Steering wheel/driver controls	surface	high	swab	NA	Ambulance	N	w_coast	Illumina HiSeq 2500	did not mention pooling; assigned as N
SRR5240629	0.87078	0.881189	4.00573e+08	0.996911	3.43218e+08	16.3724	ohara	Computer	surface	high	swab	NA	Ambulance	N	s_w_w_coast	Illumina HiSeq 2500	did not mention pooling; assigned as N
SRR5240473	0.92059	0.927155	2.73153e+08	0.999307	2.46388e+08	16.3944	ohara	Front handle	surface	high	swab	NA	Ambulance	N	w	Illumina HiSeq 2500	did not mention pooling; assigned as N
SRR5240329	0.91656	0.923444	4.13202e+08	0.999241	3.13175e+08	16.3954	ohara	Computer	surface	high	swab	NA	Ambulance	N	s_w_w_coast	Illumina HiSeq 2500	did not mention pooling; assigned as N
SRR5240406	0.96386	0.966912	4.49552e+08	0.998655	2.05595e+08	16.3969	ohara	Rear handles/rails	surface	high	swab	NA	Ambulance	N	w	Illumina HiSeq 2500	did not mention pooling; assigned as N
SRR5240544	0.93417	0.939649	3.61635e+08	0.999487	2.71127e+08	16.3974	ohara	Stretcher	surface	high	swab	NA	Ambulance	N	w_coast	Illumina HiSeq 2500	did not mention pooling; assigned as N
SRR5240402	0.83445	0.847521	3.65526e+08	0.996285	6.70185e+08	16.4008	ohara	Rear lights/control panel	surface	high	swab	NA	Ambulance	N	w	Illumina HiSeq 2500	did not mention pooling; assigned as N
SRR5240357	0.91435	0.921408	3.12003e+08	0.99922	2.60506e+08	16.4103	ohara	Emergency response bag	surface	high	swab	NA	Ambulance	N	w	Illumina HiSeq 2500	did not mention pooling; assigned as N
SRR5240616	0.9609	0.964197	6.00038e+08	0.999364	2.5498e+08	16.4152	ohara	Steering wheel/driver controls	surface	high	swab	NA	Ambulance	N	s_w_w_coast	Illumina HiSeq 2500	did not mention pooling; assigned as N
SRR5240403	0.98523	0.98649	6.37071e+08	0.998112	1.83379e+08	16.416	ohara	Suction oxygen	surface	high	swab	NA	Ambulance	N	w	Illumina HiSeq 2500	did not mention pooling; assigned as N
SRR5240641	0.92458	0.930827	2.69117e+08	0.99913	2.14976e+08	16.4189	ohara	Stretcher	surface	high	swab	NA	Ambulance	N	s_w_w_coast	Illumina HiSeq 2500	did not mention pooling; assigned as N
SRR5240381	0.94644	0.950925	3.72578e+08	0.999482	2.77027e+08	16.4189	ohara	Steering wheel/driver controls	surface	high	swab	NA	Ambulance	N	s_w_w_coast	Illumina HiSeq 2500	did not mention pooling; assigned as N
SRR5240589	0.93545	0.940826	2.28402e+08	0.998472	1.95393e+08	16.4268	ohara	Rear handles/rails	surface	high	swab	NA	Ambulance	N	w_coast	Illumina HiSeq 2500	did not mention pooling; assigned as N
SRR5240470	0.93435	0.939815	1.41833e+09	0.999067	3.1188e+08	16.442	ohara	Rear handles/rails	surface	high	swab	NA	Ambulance	N	w	Illumina HiSeq 2500	did not mention pooling; assigned as N
SRR5240509	0.96912	0.971734	5.6742e+08	0.998349	2.01649e+08	16.4441	ohara	Rear cabinets/counters	surface	high	swab	NA	Ambulance	N	w_coast	Illumina HiSeq 2500	did not mention pooling; assigned as N
SRR5240512	0.925	0.931214	3.66407e+08	0.999283	2.71496e+08	16.4454	ohara	Stretcher	surface	high	swab	NA	Ambulance	N	w_coast	Illumina HiSeq 2500	did not mention pooling; assigned as N
SRR5240572	0.97065	0.973136	3.33518e+08	0.998289	2.13717e+08	16.4457	ohara	Rear bench/seats	surface	high	swab	NA	Ambulance	N	w_coast	Illumina HiSeq 2500	did not mention pooling; assigned as N
SRR5240458	0.95077	0.954901	4.76802e+08	0.999578	3.37052e+08	16.4564	ohara	Suction oxygen	surface	high	swab	NA	Ambulance	N	w	Illumina HiSeq 2500	did not mention pooling; assigned as N
SRR5240411	0.96268	0.96583	5.26345e+08	0.998816	2.66826e+08	16.4659	ohara	Suction oxygen	surface	high	swab	NA	Ambulance	N	w	Illumina HiSeq 2500	did not mention pooling; assigned as N
SRR5240577	0.49453	0.525358	2.06694e+08	0.956213	5.89377e+16	16.4662	ohara	Rear lights/control panel	surface	high	swab	NA	Ambulance	N	w_coast	Illumina HiSeq 2500	did not mention pooling; assigned as N
SRR5240543	0.96725	0.97002	1.03751e+09	0.999006	2.33561e+08	16.4724	ohara	Rear handles/rails	surface	high	swab	NA	Ambulance	N	w_coast	Illumina HiSeq 2500	did not mention pooling; assigned as N
SRR5240292	0.96033	0.963674	4.30817e+08	0.998081	1.87645e+08	16.4763	ohara	Stethoscope	surface	high	swab	NA	Ambulance	N	s_w_w_coast	Illumina HiSeq 2500	did not mention pooling; assigned as N
SRR5240390	0.96519	0.968131	5.55723e+08	0.999293	2.84191e+08	16.4769	ohara	Steering wheel/driver controls	surface	high	swab	NA	Ambulance	N	s_w_w_coast	Illumina HiSeq 2500	did not mention pooling; assigned as N
SRR5240330	0.75635	0.774708	2.37135e+08	0.993471	9.27552e+08	16.483	ohara	Computer	surface	high	swab	NA	Ambulance	N	s_w_w_coast	Illumina HiSeq 2500	did not mention pooling; assigned as N
SRR5240332	0.89738	0.905763	4.33186e+08	0.998857	4.59656e+08	16.4875	ohara	Suction oxygen	surface	high	swab	NA	Ambulance	N	s_w_w_coast	Illumina HiSeq 2500	did not mention pooling; assigned as N
SRR5240415	0.97315	0.975427	4.79489e+08	0.999408	2.97328e+08	16.4913	ohara	Stretcher	surface	high	swab	NA	Ambulance	N	w	Illumina HiSeq 2500	did not mention pooling; assigned as N
SRR5240631	0.91938	0.926041	3.84389e+08	0.999505	3.46521e+08	16.5	ohara	Rear cabinets/counters	surface	high	swab	NA	Ambulance	N	s_w_w_coast	Illumina HiSeq 2500	did not mention pooling; assigned as N
SRR5240454	0.9571	0.960711	5.37418e+08	0.998921	2.35035e+08	16.5092	ohara	Stretcher	surface	high	swab	NA	Ambulance	N	w	Illumina HiSeq 2500	did not mention pooling; assigned as N
SRR5240422	0.92129	0.927799	4.14822e+08	0.999459	2.98243e+08	16.5116	ohara	Rear bench/seats	surface	high	swab	NA	Ambulance	N	w	Illumina HiSeq 2500	did not mention pooling; assigned as N
SRR5240430	0.93334	0.938886	4.34252e+08	0.999381	3.60258e+08	16.5147	ohara	Rear cabinets/counters	surface	high	swab	NA	Ambulance	N	w	Illumina HiSeq 2500	did not mention pooling; assigned as N
SRR5240472	0.87461	0.884731	1.89655e+08	0.999376	3.81551e+08	16.5338	ohara	Computer	surface	high	swab	NA	Ambulance	N	w	Illumina HiSeq 2500	did not mention pooling; assigned as N
SRR5240652	0.94048	0.945449	3.29656e+08	0.998335	2.37033e+08	16.5448	ohara	Stethoscope	surface	high	swab	NA	Ambulance	N	s_e	Illumina HiSeq 2500	did not mention pooling; assigned as N
SRR5240553	0.87663	0.886599	4.71469e+08	0.997904	5.58105e+08	16.5581	ohara	Front handle	surface	high	swab	NA	Ambulance	N	w_coast	Illumina HiSeq 2500	did not mention pooling; assigned as N
SRR5240446	0.97835	0.980191	5.76729e+08	0.998618	2.26549e+08	16.5681	ohara	Rear handles/rails	surface	high	swab	NA	Ambulance	N	w	Illumina HiSeq 2500	did not mention pooling; assigned as N
SRR5240681	0.89588	0.904379	4.2687e+08	0.999441	5.58103e+08	16.5727	ohara	Computer	surface	high	swab	NA	Ambulance	N	e_coast	Illumina HiSeq 2500	did not mention pooling; assigned as N
SRR5240435	0.93345	0.938987	3.4126e+08	0.99918	3.11661e+08	16.5894	ohara	Front handle	surface	high	swab	NA	Ambulance	N	w	Illumina HiSeq 2500	did not mention pooling; assigned as N
SRR5240685	0.88998	0.898933	2.74299e+08	0.999631	4.7155e+08	16.5921	ohara	Computer	surface	high	swab	NA	Ambulance	N	e_coast	Illumina HiSeq 2500	did not mention pooling; assigned as N
SRR5240447	0.93261	0.938215	1.04115e+09	0.999462	3.43881e+08	16.5941	ohara	Stretcher	surface	high	swab	NA	Ambulance	N	w	Illumina HiSeq 2500	did not mention pooling; assigned as N
SRR5240331	0.90288	0.910837	3.84652e+08	0.999477	6.09595e+08	16.6013	ohara	Rear lights/control panel	surface	high	swab	NA	Ambulance	N	s_w_w_coast	Illumina HiSeq 2500	did not mention pooling; assigned as N
SRR5240380	0.92915	0.935032	3.46775e+08	0.99899	2.58637e+08	16.6021	ohara	Front handle	surface	high	swab	NA	Ambulance	N	s_w_w_coast	Illumina HiSeq 2500	did not mention pooling; assigned as N
SRR5240334	0.94284	0.947618	8.19746e+08	0.999422	3.8484e+08	16.613	ohara	Rear bench/seats	surface	high	swab	NA	Ambulance	N	s_w_w_coast	Illumina HiSeq 2500	did not mention pooling; assigned as N
SRR5240647	0.95291	0.956866	7.91942e+08	0.999369	3.30054e+08	16.6331	ohara	Stethoscope	surface	high	swab	NA	Ambulance	N	s_e	Illumina HiSeq 2500	did not mention pooling; assigned as N
SRR5240671	0.90953	0.916967	4.21583e+08	0.999175	3.1332e+08	16.6362	ohara	Computer	surface	high	swab	NA	Ambulance	N	s_e	Illumina HiSeq 2500	did not mention pooling; assigned as N
SRR5240365	0.94067	0.945624	6.36214e+08	0.999521	4.09158e+08	16.6396	ohara	Computer	surface	high	swab	NA	Ambulance	N	s_w_w_coast	Illumina HiSeq 2500	did not mention pooling; assigned as N
SRR5240468	0.9897	0.99058	7.35495e+08	0.998107	2.29158e+08	16.6413	ohara	Rear cabinets/counters	surface	high	swab	NA	Ambulance	N	w	Illumina HiSeq 2500	did not mention pooling; assigned as N
SRR5240634	0.92422	0.930496	2.93443e+08	0.999357	2.95507e+08	16.6445	ohara	Suction oxygen	surface	high	swab	NA	Ambulance	N	s_w_w_coast	Illumina HiSeq 2500	did not mention pooling; assigned as N
SRR5240549	0.93311	0.938675	5.52936e+08	0.998875	2.83183e+08	16.6461	ohara	Rear cabinets/counters	surface	high	swab	NA	Ambulance	N	w_coast	Illumina HiSeq 2500	did not mention pooling; assigned as N
SRR5240604	0.93513	0.940532	4.34675e+08	0.999238	2.93167e+08	16.6523	ohara	Rear cabinets/counters	surface	high	swab	NA	Ambulance	N	w_coast	Illumina HiSeq 2500	did not mention pooling; assigned as N
SRR5240534	0.85645	0.867924	2.66421e+08	0.998412	4.28187e+08	16.6533	ohara	Rear bench/seats	surface	high	swab	NA	Ambulance	N	w_coast	Illumina HiSeq 2500	did not mention pooling; assigned as N
SRR5240584	0.96188	0.965096	5.67678e+08	0.998353	2.36585e+08	16.6552	ohara	Steering wheel/driver controls	surface	high	swab	NA	Ambulance	N	w_coast	Illumina HiSeq 2500	did not mention pooling; assigned as N
SRR5240599	0.97681	0.97878	5.56989e+08	0.998741	3.06377e+08	16.6559	ohara	Computer	surface	high	swab	NA	Ambulance	N	w_coast	Illumina HiSeq 2500	did not mention pooling; assigned as N
SRR5240316	0.90419	0.912045	3.61315e+08	0.999232	3.58404e+08	16.6589	ohara	Computer	surface	high	swab	NA	Ambulance	N	s_w_w_coast	Illumina HiSeq 2500	did not mention pooling; assigned as N
SRR5240522	0.96556	0.968471	6.36991e+08	0.998706	2.7058e+08	16.6711	ohara	Steering wheel/driver controls	surface	high	swab	NA	Ambulance	N	w_coast	Illumina HiSeq 2500	did not mention pooling; assigned as N
SRR5240594	0.9466	0.951072	4.97616e+08	0.999139	3.04258e+08	16.6761	ohara	Suction oxygen	surface	high	swab	NA	Ambulance	N	w_coast	Illumina HiSeq 2500	did not mention pooling; assigned as N
SRR5240325	0.90612	0.913824	5.42447e+08	0.998658	5.08183e+08	16.6804	ohara	Computer	surface	high	swab	NA	Ambulance	N	s_w_w_coast	Illumina HiSeq 2500	did not mention pooling; assigned as N
SRR5240565	0.96928	0.971881	4.07685e+08	0.998161	2.32944e+08	16.6812	ohara	Rear handles/rails	surface	high	swab	NA	Ambulance	N	w_coast	Illumina HiSeq 2500	did not mention pooling; assigned as N
SRR5240607	0.9162	0.923112	3.12795e+08	0.999207	2.99119e+08	16.6813	ohara	Stretcher	surface	high	swab	NA	Ambulance	N	w_coast	Illumina HiSeq 2500	did not mention pooling; assigned as N
SRR5240573	0.67441	0.697615	2.58962e+08	0.989481	1.51538e+10	16.6823	ohara	Rear handles/rails	surface	high	swab	NA	Ambulance	N	w_coast	Illumina HiSeq 2500	did not mention pooling; assigned as N
SRR5240287	0.95444	0.95827	4.10926e+08	0.99865	2.65342e+08	16.7034	ohara	Misc	surface	high	swab	NA	Ambulance	N	w	Illumina HiSeq 2500	did not mention pooling; assigned as N
SRR5240628	0.96189	0.965105	4.13756e+08	0.998428	2.59999e+08	16.7461	ohara	Steering wheel/driver controls	surface	high	swab	NA	Ambulance	N	s_w_w_coast	Illumina HiSeq 2500	did not mention pooling; assigned as N
SRR5240314	0.92383	0.930137	3.90393e+08	0.999648	4.3593e+08	16.7555	ohara	Computer	surface	high	swab	NA	Ambulance	N	s_w_w_coast	Illumina HiSeq 2500	did not mention pooling; assigned as N
SRR5240592	0.93304	0.93861	2.81545e+08	0.999009	3.32962e+08	16.7806	ohara	Steering wheel/driver controls	surface	high	swab	NA	Ambulance	N	w_coast	Illumina HiSeq 2500	did not mention pooling; assigned as N
SRR5240540	0.80876	0.823638	2.32032e+08	0.999329	1.06033e+09	16.7815	ohara	Suction oxygen	surface	high	swab	NA	Ambulance	N	w_coast	Illumina HiSeq 2500	did not mention pooling; assigned as N
SRR5240625	0.94844	0.952762	3.85021e+08	0.998329	2.86893e+08	16.8001	ohara	Rear bench/seats	surface	high	swab	NA	Ambulance	N	s_w_w_coast	Illumina HiSeq 2500	did not mention pooling; assigned as N
SRR5240359	0.91894	0.925636	4.15953e+08	0.999611	4.80659e+08	16.802	ohara	Stethoscope	surface	high	swab	NA	Ambulance	N	w_coast	Illumina HiSeq 2500	did not mention pooling; assigned as N
SRR5240646	0.86185	0.872925	3.33068e+08	0.999249	7.08933e+08	16.8124	ohara	Stethoscope	surface	high	swab	NA	Ambulance	N	s_e	Illumina HiSeq 2500	did not mention pooling; assigned as N
SRR5240375	0.93963	0.944668	3.93749e+08	0.999036	3.14782e+08	16.8149	ohara	Rear cabinets/counters	surface	high	swab	NA	Ambulance	N	s_w_w_coast	Illumina HiSeq 2500	did not mention pooling; assigned as N
SRR5240683	0.8517	0.863522	2.40176e+08	0.999401	5.66003e+08	16.8433	ohara	Computer	surface	high	swab	NA	Ambulance	N	e_coast	Illumina HiSeq 2500	did not mention pooling; assigned as N
SRR5240659	0.68532	0.707924	9.39038e+08	0.987418	3.28745e+12	16.8521	ohara	Rear lights/control panel	surface	high	swab	NA	Ambulance	N	s_e	Illumina HiSeq 2500	did not mention pooling; assigned as N
SRR5240351	0.87318	0.883409	3.24964e+08	0.999599	6.32434e+08	16.8529	ohara	Pulse oxymeter	surface	high	swab	NA	Ambulance	N	w	Illumina HiSeq 2500	did not mention pooling; assigned as N
SRR5240321	0.92571	0.931867	4.25161e+08	0.999545	4.47079e+08	16.8535	ohara	Computer	surface	high	swab	NA	Ambulance	N	s_w_w_coast	Illumina HiSeq 2500	did not mention pooling; assigned as N
SRR5240482	0.85962	0.87086	4.39618e+08	0.997717	6.50792e+08	16.8724	ohara	Suction oxygen	surface	high	swab	NA	Ambulance	N	w	Illumina HiSeq 2500	did not mention pooling; assigned as N
SRR5240384	0.93886	0.943961	4.52552e+08	0.999196	3.66475e+08	16.8875	ohara	Rear cabinets/counters	surface	high	swab	NA	Ambulance	N	s_w_w_coast	Illumina HiSeq 2500	did not mention pooling; assigned as N
SRR5240519	0.89757	0.905939	2.75443e+08	0.999434	4.11963e+08	16.9006	ohara	Rear handles/rails	surface	high	swab	NA	Ambulance	N	w_coast	Illumina HiSeq 2500	did not mention pooling; assigned as N
SRR5240356	0.92661	0.932696	4.12108e+08	0.998934	3.48079e+08	16.9177	ohara	Stethoscope	surface	high	swab	NA	Ambulance	N	w	Illumina HiSeq 2500	did not mention pooling; assigned as N
SRR5240469	0.89531	0.903853	7.60505e+08	0.999485	9.63609e+08	16.9192	ohara	Rear bench/seats	surface	high	swab	NA	Ambulance	N	w	Illumina HiSeq 2500	did not mention pooling; assigned as N
SRR5240492	0.67186	0.695204	2.23766e+08	0.978721	3.77794e+10	16.92	ohara	Computer	surface	high	swab	NA	Ambulance	N	w_coast	Illumina HiSeq 2500	did not mention pooling; assigned as N
SRR5240500	0.89883	0.907101	5.58672e+08	0.999076	5.83545e+08	16.94	ohara	Rear cabinets/counters	surface	high	swab	NA	Ambulance	N	w_coast	Illumina HiSeq 2500	did not mention pooling; assigned as N
SRR5240657	0.85969	0.870925	3.63449e+08	0.998855	6.75299e+08	16.9404	ohara	Computer	surface	high	swab	NA	Ambulance	N	s_e	Illumina HiSeq 2500	did not mention pooling; assigned as N
SRR5240617	0.94415	0.948821	3.17672e+08	0.998491	3.42918e+08	16.9466	ohara	Computer	surface	high	swab	NA	Ambulance	N	s_w_w_coast	Illumina HiSeq 2500	did not mention pooling; assigned as N
SRR5240638	0.89897	0.90723	3.48345e+08	0.999466	4.49665e+08	16.9497	ohara	Computer	surface	high	swab	NA	Ambulance	N	s_w_w_coast	Illumina HiSeq 2500	did not mention pooling; assigned as N
SRR5240643	0.90625	0.913944	3.38395e+08	0.999279	4.00673e+08	16.9534	ohara	Computer	surface	high	swab	NA	Ambulance	N	s_w_w_coast	Illumina HiSeq 2500	did not mention pooling; assigned as N
SRR5240542	0.84211	0.85463	2.28934e+08	0.999527	5.94986e+08	16.969	ohara	Rear bench/seats	surface	high	swab	NA	Ambulance	N	w_coast	Illumina HiSeq 2500	did not mention pooling; assigned as N
SRR5240453	0.8854	0.894704	4.48928e+08	0.999409	7.56888e+08	16.9705	ohara	Rear handles/rails	surface	high	swab	NA	Ambulance	N	w	Illumina HiSeq 2500	did not mention pooling; assigned as N
SRR5240660	0.94646	0.950943	1.84939e+09	0.9995	5.36163e+08	17.0159	ohara	Stretcher	surface	high	swab	NA	Ambulance	N	s_e	Illumina HiSeq 2500	did not mention pooling; assigned as N
SRR5240674	0.93128	0.936992	4.01702e+08	0.998801	3.75905e+08	17.0406	ohara	Computer	surface	high	swab	NA	Ambulance	N	s_e	Illumina HiSeq 2500	did not mention pooling; assigned as N
SRR5240394	0.87778	0.887662	4.67909e+08	0.999214	7.26345e+08	17.0421	ohara	Front handle	surface	high	swab	NA	Ambulance	N	s_w_w_coast	Illumina HiSeq 2500	did not mention pooling; assigned as N
SRR5240448	0.91402	0.921104	3.82444e+08	0.999515	5.09539e+08	17.0487	ohara	Computer	surface	high	swab	NA	Ambulance	N	w	Illumina HiSeq 2500	did not mention pooling; assigned as N
SRR5240389	0.88969	0.898666	3.68621e+08	0.999649	6.40509e+08	17.0679	ohara	Front handle	surface	high	swab	NA	Ambulance	N	s_w_w_coast	Illumina HiSeq 2500	did not mention pooling; assigned as N
SRR5240613	0.8713	0.88167	3.68194e+08	0.999586	7.63589e+08	17.0773	ohara	Rear handles/rails	surface	high	swab	NA	Ambulance	N	s_w_w_coast	Illumina HiSeq 2500	did not mention pooling; assigned as N
SRR5240451	0.8697	0.88019	1.19392e+09	0.99784	3.66642e+09	17.0774	ohara	Suction oxygen	surface	high	swab	NA	Ambulance	N	w	Illumina HiSeq 2500	did not mention pooling; assigned as N
SRR5240601	0.93466	0.9401	4.8097e+08	0.99922	4.87123e+08	17.0785	ohara	Steering wheel/driver controls	surface	high	swab	NA	Ambulance	N	w_coast	Illumina HiSeq 2500	did not mention pooling; assigned as N
SRR5240362	0.84923	0.861233	2.54884e+08	0.999334	5.75556e+08	17.0789	ohara	Monitor	surface	high	swab	NA	Ambulance	N	s_w_w_coast	Illumina HiSeq 2500	did not mention pooling; assigned as N
SRR5240304	0.96179	0.965013	3.57937e+08	0.996945	4.00405e+08	17.0865	ohara	Stethoscope	surface	high	swab	NA	Ambulance	N	s_w_w_coast	Illumina HiSeq 2500	did not mention pooling; assigned as N
SRR5240666	0.90975	0.91717	1.73979e+09	0.998787	6.9896e+08	17.0908	ohara	Rear cabinets/counters	surface	high	swab	NA	Ambulance	N	s_e	Illumina HiSeq 2500	did not mention pooling; assigned as N
SRR5240622	0.85238	0.864153	3.39214e+08	0.999506	8.38533e+08	17.095	ohara	Computer	surface	high	swab	NA	Ambulance	N	s_w_w_coast	Illumina HiSeq 2500	did not mention pooling; assigned as N
SRR5240585	0.96726	0.970029	6.65021e+08	0.998601	4.58749e+08	17.0979	ohara	Rear lights/control panel	surface	high	swab	NA	Ambulance	N	w_coast	Illumina HiSeq 2500	did not mention pooling; assigned as N
SRR5240564	0.90181	0.90985	3.74701e+08	0.999327	4.90785e+08	17.1021	ohara	Rear bench/seats	surface	high	swab	NA	Ambulance	N	w_coast	Illumina HiSeq 2500	did not mention pooling; assigned as N
SRR5240642	0.85187	0.86368	2.98386e+08	0.999692	7.90082e+08	17.1028	ohara	Computer	surface	high	swab	NA	Ambulance	N	s_w_w_coast	Illumina HiSeq 2500	did not mention pooling; assigned as N
SRR5240340	0.88947	0.898462	3.28666e+08	0.999372	5.1853e+08	17.1168	ohara	Computer	surface	high	swab	NA	Ambulance	N	s_w_w_coast	Illumina HiSeq 2500	did not mention pooling; assigned as N
SRR5240664	0.89202	0.900817	4.3193e+08	0.999438	5.70871e+08	17.1308	ohara	Computer	surface	high	swab	NA	Ambulance	N	s_e	Illumina HiSeq 2500	did not mention pooling; assigned as N
SRR5240382	0.69894	0.720775	2.32188e+08	0.995117	1.66336e+09	17.1333	ohara	Rear lights/control panel	surface	high	swab	NA	Ambulance	N	s_w_w_coast	Illumina HiSeq 2500	did not mention pooling; assigned as N
SRR5240398	0.91311	0.920266	7.21291e+08	0.999819	9.09758e+08	17.1341	ohara	Rear bench/seats	surface	high	swab	NA	Ambulance	N	w	Illumina HiSeq 2500	did not mention pooling; assigned as N
SRR5240418	0.96457	0.967563	6.58032e+08	0.998524	4.20213e+08	17.1389	ohara	Steering wheel/driver controls	surface	high	swab	NA	Ambulance	N	w	Illumina HiSeq 2500	did not mention pooling; assigned as N
SRR5240347	0.94352	0.948243	3.4283e+08	0.997503	4.133e+08	17.1557	ohara	Stethoscope	surface	high	swab	NA	Ambulance	N	s_w_w_coast	Illumina HiSeq 2500	did not mention pooling; assigned as N
SRR5240366	0.90856	0.916073	4.06727e+08	0.99955	5.98784e+08	17.17	ohara	Computer	surface	high	swab	NA	Ambulance	N	s_w_w_coast	Illumina HiSeq 2500	did not mention pooling; assigned as N
SRR5240395	0.81243	0.827053	2.97995e+08	0.999233	9.7936e+08	17.2154	ohara	Steering wheel/driver controls	surface	high	swab	NA	Ambulance	N	s_w_w_coast	Illumina HiSeq 2500	did not mention pooling; assigned as N
SRR5240560	0.82258	0.836494	3.58678e+08	0.998919	9.70813e+08	17.2303	ohara	Front handle	surface	high	swab	NA	Ambulance	N	w_coast	Illumina HiSeq 2500	did not mention pooling; assigned as N
SRR5240392	0.9137	0.92081	4.91445e+08	0.998878	7.03987e+08	17.2366	ohara	Rear cabinets/counters	surface	high	swab	NA	Ambulance	N	s_w_w_coast	Illumina HiSeq 2500	did not mention pooling; assigned as N
SRR5240310	0.91579	0.922735	3.82728e+08	0.997674	5.28946e+08	17.2567	ohara	Stethoscope	surface	high	swab	NA	Ambulance	N	s_w_w_coast	Illumina HiSeq 2500	did not mention pooling; assigned as N
SRR5240368	0.86827	0.878867	3.80569e+08	0.999236	6.63477e+08	17.2595	ohara	Computer	surface	high	swab	NA	Ambulance	N	s_w_w_coast	Illumina HiSeq 2500	did not mention pooling; assigned as N
SRR5240452	0.85662	0.868081	4.03019e+08	0.999394	8.61097e+08	17.2628	ohara	Rear bench/seats	surface	high	swab	NA	Ambulance	N	w	Illumina HiSeq 2500	did not mention pooling; assigned as N
SRR5240639	0.92602	0.932153	5.34642e+08	0.999468	6.99945e+08	17.2637	ohara	Front handle	surface	high	swab	NA	Ambulance	N	s_w_w_coast	Illumina HiSeq 2500	did not mention pooling; assigned as N
SRR5240353	0.82228	0.836215	3.155e+08	0.999153	8.84231e+08	17.2749	ohara	Stethoscope	surface	high	swab	NA	Ambulance	N	w	Illumina HiSeq 2500	did not mention pooling; assigned as N
SRR5240379	0.92894	0.934839	6.59839e+08	0.999254	5.92534e+08	17.2754	ohara	Computer	surface	high	swab	NA	Ambulance	N	s_w_w_coast	Illumina HiSeq 2500	did not mention pooling; assigned as N
SRR5240481	0.88376	0.893189	2.46248e+08	0.997678	6.44959e+08	17.2876	ohara	Rear lights/control panel	surface	high	swab	NA	Ambulance	N	w	Illumina HiSeq 2500	did not mention pooling; assigned as N
SRR5240600	0.90445	0.912284	4.07006e+08	0.999401	5.66123e+08	17.2999	ohara	Front handle	surface	high	swab	NA	Ambulance	N	w_coast	Illumina HiSeq 2500	did not mention pooling; assigned as N
SRR5240401	0.88566	0.894944	3.78742e+08	0.999405	6.32163e+08	17.3104	ohara	Computer	surface	high	swab	NA	Ambulance	N	w	Illumina HiSeq 2500	did not mention pooling; assigned as N
SRR5240511	0.89226	0.901038	3.0464e+08	0.998214	5.60158e+08	17.316	ohara	Rear handles/rails	surface	high	swab	NA	Ambulance	N	w_coast	Illumina HiSeq 2500	did not mention pooling; assigned as N
SRR5240436	0.91357	0.92069	4.47238e+08	0.999014	5.65375e+08	17.3168	ohara	Steering wheel/driver controls	surface	high	swab	NA	Ambulance	N	w	Illumina HiSeq 2500	did not mention pooling; assigned as N
SRR5240571	0.81086	0.825592	3.15505e+08	0.999766	1.77362e+09	17.324	ohara	Rear cabinets/counters	surface	high	swab	NA	Ambulance	N	w_coast	Illumina HiSeq 2500	did not mention pooling; assigned as N
SRR5240640	0.88856	0.897622	4.24699e+08	0.999614	7.64897e+08	17.3477	ohara	Suction oxygen	surface	high	swab	NA	Ambulance	N	s_w_w_coast	Illumina HiSeq 2500	did not mention pooling; assigned as N
SRR5240626	0.80809	0.823014	3.75757e+08	0.999821	2.12626e+09	17.3482	ohara	Computer	surface	high	swab	NA	Ambulance	N	s_w_w_coast	Illumina HiSeq 2500	did not mention pooling; assigned as N
SRR5240342	0.91289	0.920063	8.94413e+08	0.999761	1.19485e+09	17.3652	ohara	Computer	surface	high	swab	NA	Ambulance	N	s_w_w_coast	Illumina HiSeq 2500	did not mention pooling; assigned as N
SRR5240367	0.84226	0.854769	2.93278e+08	0.999447	7.60115e+08	17.3665	ohara	Computer	surface	high	swab	NA	Ambulance	N	s_w_w_coast	Illumina HiSeq 2500	did not mention pooling; assigned as N
SRR5240303	0.88781	0.89693	3.32322e+08	0.998461	6.14507e+08	17.3685	ohara	Stethoscope	surface	high	swab	NA	Ambulance	N	s_w_w_coast	Illumina HiSeq 2500	did not mention pooling; assigned as N
SRR5240405	0.86895	0.879496	5.16953e+08	0.999779	1.20634e+09	17.3785	ohara	Rear bench/seats	surface	high	swab	NA	Ambulance	N	w	Illumina HiSeq 2500	did not mention pooling; assigned as N
SRR5240408	0.91904	0.925728	5.11695e+08	0.999218	6.38507e+08	17.3907	ohara	Computer	surface	high	swab	NA	Ambulance	N	w	Illumina HiSeq 2500	did not mention pooling; assigned as N
SRR5240413	0.85713	0.868554	5.16273e+08	0.999468	1.15148e+09	17.4141	ohara	Rear bench/seats	surface	high	swab	NA	Ambulance	N	w	Illumina HiSeq 2500	did not mention pooling; assigned as N
SRR5240294	0.85952	0.870767	2.66777e+08	0.998914	6.44285e+08	17.4247	ohara	Stethoscope	surface	high	swab	NA	Ambulance	N	s_w_w_coast	Illumina HiSeq 2500	did not mention pooling; assigned as N
SRR5240350	0.87733	0.887246	3.92035e+08	0.998504	9.4108e+08	17.4514	ohara	Stethoscope	surface	high	swab	NA	Ambulance	N	s_w_w_coast	Illumina HiSeq 2500	did not mention pooling; assigned as N
SRR5240363	0.91873	0.925442	6.52119e+08	0.999481	9.078e+08	17.4537	ohara	Emergency response bag	surface	high	swab	NA	Ambulance	N	s_w_w_coast	Illumina HiSeq 2500	did not mention pooling; assigned as N
SRR5240373	0.88722	0.896385	4.56574e+08	0.998235	8.39525e+08	17.4556	ohara	Rear lights/control panel	surface	high	swab	NA	Ambulance	N	s_w_w_coast	Illumina HiSeq 2500	did not mention pooling; assigned as N
SRR5240605	0.86202	0.873082	6.00231e+08	0.998915	1.01096e+09	17.4771	ohara	Rear bench/seats	surface	high	swab	NA	Ambulance	N	w_coast	Illumina HiSeq 2500	did not mention pooling; assigned as N
SRR5240504	0.77654	0.793591	2.67923e+08	0.999735	1.38741e+09	17.5085	ohara	Computer	surface	high	swab	NA	Ambulance	N	w_coast	Illumina HiSeq 2500	did not mention pooling; assigned as N
SRR5240354	0.8535	0.865191	5.03502e+08	0.999774	1.56018e+09	17.5096	ohara	Monitor	surface	high	swab	NA	Ambulance	N	w	Illumina HiSeq 2500	did not mention pooling; assigned as N
SRR5240587	0.7331	0.75291	3.17995e+08	0.999709	4.85743e+09	17.5349	ohara	Rear cabinets/counters	surface	high	swab	NA	Ambulance	N	w_coast	Illumina HiSeq 2500	did not mention pooling; assigned as N
SRR5240623	0.82025	0.834328	2.363e+08	0.9989	7.91256e+08	17.5359	ohara	Suction oxygen	surface	high	swab	NA	Ambulance	N	s_w_w_coast	Illumina HiSeq 2500	did not mention pooling; assigned as N
SRR5240615	0.81683	0.831147	3.52392e+08	0.999295	1.07748e+09	17.5384	ohara	Front handle	surface	high	swab	NA	Ambulance	N	s_w_w_coast	Illumina HiSeq 2500	did not mention pooling; assigned as N
SRR5240596	0.78534	0.801808	3.44137e+08	0.999407	1.55613e+09	17.5462	ohara	Rear bench/seats	surface	high	swab	NA	Ambulance	N	w_coast	Illumina HiSeq 2500	did not mention pooling; assigned as N
SRR5240431	0.83435	0.847428	3.49296e+08	0.999408	9.43287e+08	17.5465	ohara	Rear bench/seats	surface	high	swab	NA	Ambulance	N	w	Illumina HiSeq 2500	did not mention pooling; assigned as N
SRR5240386	0.84155	0.854111	3.51639e+08	0.999315	8.61081e+08	17.5558	ohara	Rear handles/rails	surface	high	swab	NA	Ambulance	N	s_w_w_coast	Illumina HiSeq 2500	did not mention pooling; assigned as N
SRR5240317	0.87211	0.882419	3.93518e+08	0.999313	7.79819e+08	17.5836	ohara	Computer	surface	high	swab	NA	Ambulance	N	s_w_w_coast	Illumina HiSeq 2500	did not mention pooling; assigned as N
SRR5240518	0.88377	0.893198	5.33505e+08	0.999499	9.15795e+08	17.5848	ohara	Rear bench/seats	surface	high	swab	NA	Ambulance	N	w_coast	Illumina HiSeq 2500	did not mention pooling; assigned as N
SRR5240566	0.76828	0.785871	2.64104e+08	0.999191	1.18221e+09	17.5853	ohara	Stretcher	surface	high	swab	NA	Ambulance	N	w_coast	Illumina HiSeq 2500	did not mention pooling; assigned as N
SRR5240550	0.90536	0.913123	1.01555e+09	0.999524	1.22245e+09	17.5857	ohara	Rear bench/seats	surface	high	swab	NA	Ambulance	N	w_coast	Illumina HiSeq 2500	did not mention pooling; assigned as N
SRR5240609	0.87061	0.881032	3.86348e+08	0.99939	8.59847e+08	17.5931	ohara	Steering wheel/driver controls	surface	high	swab	NA	Ambulance	N	w_coast	Illumina HiSeq 2500	did not mention pooling; assigned as N
SRR5240645	0.71666	0.737461	1.40918e+08	0.998842	9.54989e+08	17.6039	ohara	Stethoscope	surface	high	swab	NA	Ambulance	N	s_e	Illumina HiSeq 2500	did not mention pooling; assigned as N
SRR5240289	0.82331	0.837172	2.7212e+08	0.999035	8.69481e+08	17.6331	ohara	Stethoscope	surface	high	swab	NA	Ambulance	N	s_w_w_coast	Illumina HiSeq 2500	did not mention pooling; assigned as N
SRR5240443	0.81852	0.832719	3.22917e+08	0.998288	1.35436e+09	17.6464	ohara	Rear lights/control panel	surface	high	swab	NA	Ambulance	N	w	Illumina HiSeq 2500	did not mention pooling; assigned as N
SRR5240488	0.82528	0.839003	4.45224e+08	0.998995	1.28848e+09	17.6541	ohara	Computer	surface	high	swab	NA	Ambulance	N	w_coast	Illumina HiSeq 2500	did not mention pooling; assigned as N
SRR5240341	0.86093	0.872073	5.40763e+08	0.999555	1.25754e+09	17.6681	ohara	Computer	surface	high	swab	NA	Ambulance	N	s_w_w_coast	Illumina HiSeq 2500	did not mention pooling; assigned as N
SRR5240311	0.79693	0.812618	2.7487e+08	0.999048	1.00978e+09	17.6711	ohara	Computer	surface	high	swab	NA	Ambulance	N	s_w_w_coast	Illumina HiSeq 2500	did not mention pooling; assigned as N
SRR5240490	0.65401	0.6783	2.8718e+08	0.996529	4.25894e+09	17.6913	ohara	Computer	surface	high	swab	NA	Ambulance	N	w_coast	Illumina HiSeq 2500	did not mention pooling; assigned as N
SRR5240288	0.7395	0.758916	1.8221e+08	0.998396	1.18866e+09	17.6994	ohara	Stethoscope	surface	high	swab	NA	Ambulance	N	s_w_w_coast	Illumina HiSeq 2500	did not mention pooling; assigned as N
SRR5240672	0.85903	0.870313	5.94692e+08	0.999384	1.2209e+09	17.7152	ohara	Rear bench/seats	surface	high	swab	NA	Ambulance	N	s_e	Illumina HiSeq 2500	did not mention pooling; assigned as N
SRR5240313	0.40275	0.435467	4.37761e+07	0.999696	1.98462e+09	17.7229	ohara	Computer	surface	high	swab	NA	Ambulance	N	s_w_w_coast	Illumina HiSeq 2500	did not mention pooling; assigned as N
SRR5240338	0.76352	0.781419	2.21415e+08	0.998892	1.12999e+09	17.7312	ohara	Computer	surface	high	swab	NA	Ambulance	N	s_w_w_coast	Illumina HiSeq 2500	did not mention pooling; assigned as N
SRR5240588	0.85932	0.870582	6.58437e+08	0.999308	1.76487e+09	17.7578	ohara	Rear bench/seats	surface	high	swab	NA	Ambulance	N	w_coast	Illumina HiSeq 2500	did not mention pooling; assigned as N
SRR5240445	0.88751	0.896652	7.0188e+08	0.999311	1.0314e+09	17.7774	ohara	Rear bench/seats	surface	high	swab	NA	Ambulance	N	w	Illumina HiSeq 2500	did not mention pooling; assigned as N
SRR5240302	0.62932	0.654854	2.22504e+08	0.941211	1.65826e+13	17.7934	ohara	Stethoscope	surface	high	swab	NA	Ambulance	N	s_w_w_coast	Illumina HiSeq 2500	did not mention pooling; assigned as N
SRR5240297	0.84483	0.857153	5.28519e+08	0.999399	1.38864e+09	17.8373	ohara	Stethoscope	surface	high	swab	NA	Ambulance	N	s_w_w_coast	Illumina HiSeq 2500	did not mention pooling; assigned as N
SRR5240663	0.87747	0.887376	1.57281e+09	0.998638	1.94522e+09	17.8448	ohara	Rear bench/seats	surface	high	swab	NA	Ambulance	N	s_e	Illumina HiSeq 2500	did not mention pooling; assigned as N
SRR5240420	0.71347	0.73446	4.59604e+08	0.998831	7.6062e+09	17.8793	ohara	Suction oxygen	surface	high	swab	NA	Ambulance	N	w	Illumina HiSeq 2500	did not mention pooling; assigned as N
SRR5240460	0.77262	0.789928	2.7538e+08	0.999481	1.23936e+09	17.8912	ohara	Rear bench/seats	surface	high	swab	NA	Ambulance	N	w	Illumina HiSeq 2500	did not mention pooling; assigned as N
SRR5240680	0.72484	0.745152	2.38119e+08	0.998978	1.57334e+09	17.9009	ohara	Computer	surface	high	swab	NA	Ambulance	N	e_coast	Illumina HiSeq 2500	did not mention pooling; assigned as N
SRR5240428	0.85325	0.864959	4.83321e+08	0.998935	1.51114e+09	17.9035	ohara	Rear lights/control panel	surface	high	swab	NA	Ambulance	N	w	Illumina HiSeq 2500	did not mention pooling; assigned as N
SRR5240570	0.71634	0.73716	2.45412e+08	0.999068	1.89545e+09	17.9101	ohara	Suction oxygen	surface	high	swab	NA	Ambulance	N	w_coast	Illumina HiSeq 2500	did not mention pooling; assigned as N
SRR5240548	0.74556	0.764599	3.19617e+08	0.998973	1.69465e+09	17.9688	ohara	Suction oxygen	surface	high	swab	NA	Ambulance	N	w_coast	Illumina HiSeq 2500	did not mention pooling; assigned as N
SRR5240580	0.77667	0.793712	3.614e+08	0.999416	1.58651e+09	17.9972	ohara	Rear bench/seats	surface	high	swab	NA	Ambulance	N	w_coast	Illumina HiSeq 2500	did not mention pooling; assigned as N
SRR5240385	0.75777	0.776038	4.16475e+08	0.999425	2.16504e+09	18.0686	ohara	Rear bench/seats	surface	high	swab	NA	Ambulance	N	s_w_w_coast	Illumina HiSeq 2500	did not mention pooling; assigned as N
SRR5240489	0.56184	0.590359	2.73057e+08	0.99332	8.85925e+09	18.0693	ohara	Computer	surface	high	swab	NA	Ambulance	N	w_coast	Illumina HiSeq 2500	did not mention pooling; assigned as N
SRR5240312	0.71519	0.736078	2.98203e+08	0.99899	2.10825e+09	18.0763	ohara	Computer	surface	high	swab	NA	Ambulance	N	s_w_w_coast	Illumina HiSeq 2500	did not mention pooling; assigned as N
SRR5240459	0.74507	0.76414	3.90863e+08	0.997007	3.76604e+09	18.162	ohara	Rear cabinets/counters	surface	high	swab	NA	Ambulance	N	w	Illumina HiSeq 2500	did not mention pooling; assigned as N
SRR5240633	0.75212	0.770747	4.66128e+08	0.999176	3.05011e+09	18.1833	ohara	Rear lights/control panel	surface	high	swab	NA	Ambulance	N	s_w_w_coast	Illumina HiSeq 2500	did not mention pooling; assigned as N
SRR5240376	0.73377	0.753539	4.08408e+08	0.999641	2.73622e+09	18.2216	ohara	Rear bench/seats	surface	high	swab	NA	Ambulance	N	s_w_w_coast	Illumina HiSeq 2500	did not mention pooling; assigned as N
SRR5240461	0.63886	0.663923	4.96715e+08	0.999251	2.03807e+10	18.487	ohara	Rear handles/rails	surface	high	swab	NA	Ambulance	N	w	Illumina HiSeq 2500	did not mention pooling; assigned as N
SRR5240322	0.49973	0.530406	2.26084e+08	0.995508	1.0742e+10	18.4973	ohara	Computer	surface	high	swab	NA	Ambulance	N	s_w_w_coast	Illumina HiSeq 2500	did not mention pooling; assigned as N
SRR5240494	0.49235	0.523241	2.3428e+08	0.957144	564211481751893	18.645	ohara	Computer	surface	high	swab	NA	Ambulance	N	w_coast	Illumina HiSeq 2500	did not mention pooling; assigned as N
SRR5240387	0.63634	0.661528	3.82699e+08	0.999583	5.00679e+09	18.6831	ohara	Stretcher	surface	high	swab	NA	Ambulance	N	s_w_w_coast	Illumina HiSeq 2500	did not mention pooling; assigned as N
SRR5240370	0.60867	0.635184	2.86618e+08	0.999482	3.60156e+09	18.7056	ohara	Rear handles/rails	surface	high	swab	NA	Ambulance	N	s_w_w_coast	Illumina HiSeq 2500	did not mention pooling; assigned as N
SRR5240531	0.53873	0.568121	2.82279e+08	0.99895	7.54601e+09	18.9009	ohara	Rear lights/control panel	surface	high	swab	NA	Ambulance	N	w_coast	Illumina HiSeq 2500	did not mention pooling; assigned as N
SRR5240291	0.40965	0.442282	1.55874e+08	0.999339	9.27616e+09	18.9398	ohara	Stethoscope	surface	high	swab	NA	Ambulance	N	s_w_w_coast	Illumina HiSeq 2500	did not mention pooling; assigned as N
SRR5240529	0.29083	0.323372	5.95245e+07	0.997717	9.41813e+10	19.0108	ohara	Front handle	surface	high	swab	NA	Ambulance	N	w_coast	Illumina HiSeq 2500	did not mention pooling; assigned as N
SRR5240378	0.47251	0.503933	2.63942e+08	0.999516	1.26069e+10	19.1238	ohara	Stretcher	surface	high	swab	NA	Ambulance	N	s_w_w_coast	Illumina HiSeq 2500	did not mention pooling; assigned as N
SRR5240579	0.43186	0.464152	2.94129e+08	0.998546	3.80303e+10	19.355	ohara	Rear cabinets/counters	surface	high	swab	NA	Ambulance	N	w_coast	Illumina HiSeq 2500	did not mention pooling; assigned as N
SRR5240578	0.37811	0.411048	1.99018e+08	0.999624	1.26425e+10	19.3756	ohara	Suction oxygen	surface	high	swab	NA	Ambulance	N	w_coast	Illumina HiSeq 2500	did not mention pooling; assigned as N
SRR5240301	0.38349	0.416391	2.0631e+08	0.999504	1.68285e+10	19.3863	ohara	Stethoscope	surface	high	swab	NA	Ambulance	N	s_w_w_coast	Illumina HiSeq 2500	did not mention pooling; assigned as N
SRR5240429	0.46499	0.496597	3.39303e+08	0.999249	1.37244e+10	19.4637	ohara	Suction oxygen	surface	high	swab	NA	Ambulance	N	w	Illumina HiSeq 2500	did not mention pooling; assigned as N
SRR5240485	0.34546	0.378478	2.01727e+08	0.997662	2.41907e+10	19.4996	ohara	Computer	surface	high	swab	NA	Ambulance	N	w_coast	Illumina HiSeq 2500	did not mention pooling; assigned as N
SRR5240521	0.1943	0.223655	5.70829e+07	0.998996	3.33009e+10	19.5268	ohara	Computer	surface	high	swab	NA	Ambulance	N	w_coast	Illumina HiSeq 2500	did not mention pooling; assigned as N
SRR5240614	0.22624	0.257039	1.44054e+08	0.998949	3.91135e+10	20.0402	ohara	Computer	surface	high	swab	NA	Ambulance	N	s_w_w_coast	Illumina HiSeq 2500	did not mention pooling; assigned as N
SRR5240611	0.17219	0.200272	8.71539e+07	0.997319	9.97661e+10	20.2864	ohara	Suction oxygen	surface	high	swab	NA	Ambulance	N	s_w_w_coast	Illumina HiSeq 2500	did not mention pooling; assigned as N
SRR5240620	0.22387	0.254577	2.03007e+08	0.998889	8.68403e+10	20.4813	ohara	Computer	surface	high	swab	NA	Ambulance	N	s_w_w_coast	Illumina HiSeq 2500	did not mention pooling; assigned as N
SRR5240290	0.15302	0.179789	1.77225e+08	0.999554	9.57579e+10	20.9032	ohara	Stethoscope	surface	high	swab	NA	Ambulance	N	s_w_w_coast	Illumina HiSeq 2500	did not mention pooling; assigned as N
SRR5240486	0.16797	0.19578	2.08518e+08	0.999832	1.53125e+11	21.044	ohara	Computer	surface	high	swab	NA	Ambulance	N	w_coast	Illumina HiSeq 2500	did not mention pooling; assigned as N
SRR5240610	0.09942	0.121219	9.7976e+07	0.99824	1.66073e+11	21.0856	ohara	Computer	surface	high	swab	NA	Ambulance	N	s_w_w_coast	Illumina HiSeq 2500	did not mention pooling; assigned as N
SRR5240621	0.11516	0.138649	7.52618e+07	0.998271	234513705962630	22.6385	ohara	Computer	surface	high	swab	NA	Ambulance	N	s_w_w_coast	Illumina HiSeq 2500	did not mention pooling; assigned as N
ERR3209754	0.91443	0.921482	1.27812e+09	0.999075	1.43808e+09	17.8695	chng	Aerator	sink	sink	swab	NA	Isolation room	N	Singapore	Illumina HiSeq 2000
ERR3209755	0.95157	0.955635	1.18984e+09	0.998301	6.09699e+08	17.1299	chng	Aerator	sink	sink	swab	NA	Isolation room	N	Singapore	Illumina HiSeq 2000
ERR3209756	0.93958	0.944622	1.30888e+09	0.999311	9.44718e+08	16.9894	chng	Aerator	sink	sink	swab	NA	Isolation room	N	Singapore	Illumina HiSeq 2000
ERR3209757	0.95716	0.960766	1.34972e+09	0.999237	5.34486e+08	16.895	chng	Aerator	sink	sink	swab	NA	Isolation room	N	Singapore	Illumina HiSeq 2000
ERR3209758	0.86466	0.875526	9.35025e+08	0.995895	1.56312e+09	16.4513	chng	Aerator	sink	sink	swab	NA	Isolation room	N	Singapore	Illumina HiSeq 2000
ERR3209759	0.75474	0.773201	4.60326e+08	0.998295	4.10595e+09	17.4342	chng	Aerator	sink	sink	swab	NA	Isolation room	N	Singapore	Illumina HiSeq 2000
ERR3209760	0.51891	0.548984	1.74006e+08	0.999155	4.63731e+09	18.4329	chng	Bedside locker	surface	high	swab	NA	Isolation room	N	Singapore	Illumina HiSeq 2000
ERR3209761	0.46162	0.493306	4.8576e+08	0.998931	6.71788e+10	19.7033	chng	Bedside locker	surface	high	swab	NA	Isolation room	N	Singapore	Illumina HiSeq 2000
ERR3209762	0.6916	0.713852	1.21854e+09	0.999245	3.05859e+10	18.8881	chng	Bedside locker	surface	high	swab	NA	Isolation room	N	Singapore	Illumina HiSeq 2000
ERR3209763	0.65334	0.677665	7.85454e+08	0.999272	1.03895e+10	19.1444	chng	Bedside locker	surface	high	swab	NA	Isolation room	N	Singapore	Illumina HiSeq 2000
ERR3209764	0.43394	0.466195	3.74079e+08	0.999662	1.84851e+10	19.7583	chng	Bedside locker	surface	high	swab	NA	Isolation room	N	Singapore	Illumina HiSeq 2000
ERR3209765	0.28961	0.322132	1.15886e+08	0.999766	8.83005e+09	19.3189	chng	Bedrail	surface	high	swab	NA	Isolation room	N	Singapore	Illumina HiSeq 2000
ERR3209766	0.66096	0.684886	7.28549e+08	0.998052	2.83248e+10	18.361	chng	Bedrail	surface	high	swab	NA	Isolation room	N	Singapore	Illumina HiSeq 2000
ERR3209767	0.46788	0.499417	2.40013e+08	0.999615	7.64214e+09	19.0974	chng	Bedrail	surface	high	swab	NA	Isolation room	N	Singapore	Illumina HiSeq 2000
ERR3209768	0.73649	0.756092	3.62629e+08	0.99964	2.64407e+09	17.9523	chng	Bedrail	surface	high	swab	NA	Isolation room	N	Singapore	Illumina HiSeq 2000
ERR3209769	0.35843	0.391446	1.01808e+08	0.999645	5.05528e+09	18.8355	chng	Bedrail	surface	high	swab	NA	Isolation room	N	Singapore	Illumina HiSeq 2000
ERR3209770	0.57442	0.602431	7.5079e+08	0.998368	1.94599e+10	19.4375	chng	Cardiac table	surface	high	swab	NA	Isolation room	N	Singapore	Illumina HiSeq 2000
ERR3209771	0.49821	0.528931	5.29896e+08	0.999313	1.77615e+10	19.6618	chng	Cardiac table	surface	high	swab	NA	Isolation room	N	Singapore	Illumina HiSeq 2000
ERR3209772	0.64701	0.671661	1.10682e+09	0.998825	2.23712e+10	19.2614	chng	Cardiac table	surface	high	swab	NA	Isolation room	N	Singapore	Illumina HiSeq 2000
ERR3209773	0.82702	0.84062	9.6335e+08	0.989235	1.10285e+09	16.3716	chng	Cardiac table	surface	high	swab	NA	Isolation room	N	Singapore	Illumina HiSeq 2000
ERR3209774	0.35661	0.389629	9.54441e+07	0.999055	8.52434e+09	18.7235	chng	Door handle	surface	high	swab	NA	Isolation room	N	Singapore	Illumina HiSeq 2000
ERR3209775	0.53246	0.562074	8.03436e+08	0.99934	6.27224e+10	19.7231	chng	Door handle	surface	high	swab	NA	Isolation room	N	Singapore	Illumina HiSeq 2000
ERR3209776	0.5134	0.543653	4.59756e+08	0.999648	2.97058e+10	19.3855	chng	Door handle	surface	high	swab	NA	Isolation room	N	Singapore	Illumina HiSeq 2000
ERR3209777	0.53707	0.566521	1.15924e+08	0.999561	2.25118e+09	18.0876	chng	Pulse oxymeter	surface	high	swab	NA	Isolation room	N	Singapore	Illumina HiSeq 2000
ERR3209778	0.8398	0.852487	7.27842e+08	0.996901	2.32619e+09	16.7579	chng	Pulse oxymeter	surface	high	swab	NA	Isolation room	N	Singapore	Illumina HiSeq 2000
ERR3209779	0.79128	0.80735	1.87641e+08	0.999389	7.20758e+08	17.3662	chng	Pulse oxymeter	surface	high	swab	NA	Isolation room	N	Singapore	Illumina HiSeq 2000
ERR3209780	0.80695	0.821952	3.31495e+08	0.999398	1.14999e+09	17.5986	chng	Pulse oxymeter	surface	high	swab	NA	Isolation room	N	Singapore	Illumina HiSeq 2000
ERR3209781	0.7231	0.743516	3.17785e+08	0.998997	2.12045e+09	17.8348	chng	Sink trap	sink	sink	swab	NA	Isolation room	N	Singapore	Illumina HiSeq 2000
ERR3209782	0.53787	0.567292	1.21424e+07	0.993808	1.9246e+09	15.7042	chng	Sink trap	sink	sink	swab	NA	Isolation room	N	Singapore	Illumina HiSeq 2000
ERR3209783	0.74971	0.768489	1.04429e+09	0.998758	6.21042e+09	18.6855	chng	Sink trap	sink	sink	swab	NA	Isolation room	N	Singapore	Illumina HiSeq 2000
ERR3209784	0.89637	0.904832	1.35706e+09	0.998895	1.6683e+09	17.1646	chng	Sink trap	sink	sink	swab	NA	Isolation room	N	Singapore	Illumina HiSeq 2000
ERR3209785	0.95243	0.956425	1.14782e+09	0.999216	9.75502e+08	17.141	chng	Sink trap	sink	sink	swab	NA	Isolation room	N	Singapore	Illumina HiSeq 2000
ERR3209786	0.60817	0.634707	2.10788e+08	0.999409	3.63866e+09	18.1328	chng	Sink trap	sink	sink	swab	NA	Isolation room	N	Singapore	Illumina HiSeq 2000
ERR3209787	0.34125	0.374259	2.09361e+08	0.999616	1.42646e+10	19.6242	chng	Bedside locker	surface	high	swab	NA	MDRO ward	N	Singapore	Illumina HiSeq 2000
ERR3209788	0.52594	0.555779	7.30899e+08	0.998929	3.55406e+10	19.6994	chng	Bedrail	surface	high	swab	NA	MDRO ward	N	Singapore	Illumina HiSeq 2000
ERR3209789	0.75531	0.773734	1.07924e+09	0.985677	6.58012e+09	17.0917	chng	Cardiac table	surface	high	swab	NA	MDRO ward	N	Singapore	Illumina HiSeq 2000
ERR3209790	0.63325	0.658591	1.12042e+09	0.999751	2.27097e+10	19.6072	chng	Bedside locker	surface	high	swab	NA	MDRO ward	N	Singapore	Illumina HiSeq 2000
ERR3209791	0.77216	0.789498	7.53966e+08	0.998875	4.35586e+09	18.0736	chng	Bedrail	surface	high	swab	NA	MDRO ward	N	Singapore	Illumina HiSeq 2000
ERR3209792	0.96659	0.969415	1.32468e+09	0.998242	1.25818e+08	15.9975	chng	Cardiac table	surface	high	swab	NA	MDRO ward	N	Singapore	Illumina HiSeq 2000
ERR3209793	0.64186	0.666772	9.63868e+08	0.999752	1.6218e+10	19.5266	chng	Bedside locker	surface	high	swab	NA	MDRO ward	N	Singapore	Illumina HiSeq 2000
ERR3209794	0.64027	0.665262	7.87576e+08	0.99936	1.2741e+10	19.1976	chng	Bedrail	surface	high	swab	NA	MDRO ward	N	Singapore	Illumina HiSeq 2000
ERR3209795	0.78155	0.79827	1.20055e+09	0.998159	5.71619e+09	18.1919	chng	Cardiac table	surface	high	swab	NA	MDRO ward	N	Singapore	Illumina HiSeq 2000
ERR3209796	0.34344	0.376454	3.34931e+08	0.99975	3.39849e+10	20.1551	chng	Bedside locker	surface	high	swab	NA	MDRO ward	N	Singapore	Illumina HiSeq 2000
ERR3209797	0.46722	0.498773	3.16844e+08	0.999736	1.97788e+10	19.3263	chng	Bedrail	surface	high	swab	NA	MDRO ward	N	Singapore	Illumina HiSeq 2000
ERR3209798	0.80673	0.821748	7.32137e+08	0.998265	2.41111e+09	17.9022	chng	Cardiac table	surface	high	swab	NA	MDRO ward	N	Singapore	Illumina HiSeq 2000
ERR3209799	0.44266	0.474751	7.12968e+08	0.999804	3.16637e+10	20.3524	chng	Bedside locker	surface	high	swab	NA	MDRO ward	N	Singapore	Illumina HiSeq 2000
ERR3209800	0.47585	0.507188	6.99838e+08	0.999944	5.74505e+10	20.0871	chng	Bedside locker	surface	high	swab	NA	MDRO ward	N	Singapore	Illumina HiSeq 2000
ERR3209801	0.53246	0.562074	5.77881e+08	0.999635	1.58781e+10	19.6006	chng	Bedrail	surface	high	swab	NA	MDRO ward	N	Singapore	Illumina HiSeq 2000
ERR3209802	0.86271	0.873721	1.39125e+09	0.992851	2.13061e+09	16.7024	chng	Cardiac table	surface	high	swab	NA	MDRO ward	N	Singapore	Illumina HiSeq 2000
ERR3209803	0.95618	0.959867	1.44481e+09	0.998857	1.19694e+09	17.8327	chng	Aerator	sink	sink	swab	NA	MDRO ward	N	Singapore	Illumina HiSeq 2000
ERR3209804	0.52328	0.553209	3.18008e+08	0.999587	6.83938e+09	19.1779	chng	Pulse oxymeter	surface	high	swab	NA	MDRO ward	N	Singapore	Illumina HiSeq 2000
ERR3209805	0.9297	0.935538	1.18715e+09	0.998981	6.76853e+08	16.8353	chng	Sink trap	sink	sink	swab	NA	MDRO ward	N	Singapore	Illumina HiSeq 2000
ERR3209806	0.42946	0.461793	8.53572e+08	0.999938	7.31803e+10	20.5963	chng	Bedside locker	surface	high	swab	NA	Standard ward	N	Singapore	Illumina HiSeq 2000
ERR3209807	0.56316	0.591627	8.80735e+08	0.999652	2.17228e+10	19.8881	chng	Bedside locker	surface	high	swab	NA	Standard ward	N	Singapore	Illumina HiSeq 2000
ERR3209808	0.61036	0.636796	6.93713e+08	0.996204	2.63357e+10	18.7484	chng	Bedside locker	surface	high	swab	NA	Standard ward	N	Singapore	Illumina HiSeq 2000
ERR3209809	0.44253	0.474624	8.12841e+08	0.999653	8.89276e+10	20.3937	chng	Bedrail	surface	high	swab	NA	Standard ward	N	Singapore	Illumina HiSeq 2000
ERR3209810	0.42569	0.458086	5.18344e+08	0.999821	3.85957e+10	20.0909	chng	Bedrail	surface	high	swab	NA	Standard ward	N	Singapore	Illumina HiSeq 2000
ERR3209811	0.47205	0.503484	4.38638e+08	0.999397	1.58392e+10	19.6392	chng	Bedrail	surface	high	swab	NA	Standard ward	N	Singapore	Illumina HiSeq 2000
ERR3209812	0.52361	0.553528	4.07996e+08	0.998872	1.44834e+10	19.1731	chng	Bedrail	surface	high	swab	NA	Standard ward	N	Singapore	Illumina HiSeq 2000
ERR3209813	0.8483	0.860371	9.81975e+08	0.998849	2.0101e+09	18.0919	chng	Cardiac table	surface	high	swab	NA	Standard ward	N	Singapore	Illumina HiSeq 2000
ERR3209814	0.5204	0.550425	1.39719e+09	0.998687	6.43971e+10	20.6307	chng	Cardiac table	surface	high	swab	NA	Standard ward	N	Singapore	Illumina HiSeq 2000
ERR3209815	0.58955	0.616919	7.75064e+08	0.999666	1.48673e+10	19.6491	chng	Bedside locker	surface	high	swab	NA	Standard ward	N	Singapore	Illumina HiSeq 2000
ERR3209816	0.5766	0.60452	1.04948e+09	0.999336	2.37452e+10	20.0275	chng	Bedside locker	surface	high	swab	NA	Standard ward	N	Singapore	Illumina HiSeq 2000
ERR3209817	0.71319	0.734196	7.19591e+08	0.998895	6.10702e+09	18.5871	chng	Bedside locker	surface	high	swab	NA	Standard ward	N	Singapore	Illumina HiSeq 2000
ERR3209818	0.74026	0.759629	9.01644e+08	0.999345	8.76718e+09	18.4665	chng	Bedrail	surface	high	swab	NA	Standard ward	N	Singapore	Illumina HiSeq 2000
ERR3209819	0.78668	0.803058	1.24689e+09	0.999859	9.83201e+09	18.3633	chng	Bedrail	surface	high	swab	NA	Standard ward	N	Singapore	Illumina HiSeq 2000
ERR3209820	0.58195	0.609646	5.14302e+08	0.99924	1.68568e+10	18.9934	chng	Bedrail	surface	high	swab	NA	Standard ward	N	Singapore	Illumina HiSeq 2000
ERR3209821	0.77949	0.796346	1.04721e+09	0.998158	4.57703e+09	18.3619	chng	Cardiac table	surface	high	swab	NA	Standard ward	N	Singapore	Illumina HiSeq 2000
ERR3209822	0.87387	0.884047	1.51461e+09	0.998862	3.25339e+09	18.2032	chng	Cardiac table	surface	high	swab	NA	Standard ward	N	Singapore	Illumina HiSeq 2000
ERR3209823	0.49795	0.528678	7.16302e+08	0.999542	2.48321e+10	20.0485	chng	Cardiac table	surface	high	swab	NA	Standard ward	N	Singapore	Illumina HiSeq 2000
ERR3209824	0.67315	0.696424	8.23006e+08	0.999653	8.75565e+09	19.2785	chng	Bedside locker	surface	high	swab	NA	Standard ward	N	Singapore	Illumina HiSeq 2000
ERR3209825	0.50579	0.536282	6.67332e+08	0.999135	5.2745e+10	19.7056	chng	Bedside locker	surface	high	swab	NA	Standard ward	N	Singapore	Illumina HiSeq 2000
ERR3209826	0.50306	0.533636	9.51476e+08	0.99932	2.1501e+11	19.9543	chng	Bedrail	surface	high	swab	NA	Standard ward	N	Singapore	Illumina HiSeq 2000
ERR3209827	0.40967	0.442302	2.88503e+08	0.999642	1.3658e+10	19.5804	chng	Bedrail	surface	high	swab	NA	Standard ward	N	Singapore	Illumina HiSeq 2000
ERR3209828	0.56765	0.595937	4.79247e+08	0.999645	8.85087e+09	19.302	chng	Bedrail	surface	high	swab	NA	Standard ward	N	Singapore	Illumina HiSeq 2000
ERR3209829	0.62117	0.647097	7.00593e+08	0.999818	1.45611e+10	19.2441	chng	Bedrail	surface	high	swab	NA	Standard ward	N	Singapore	Illumina HiSeq 2000
ERR3209830	0.89154	0.900374	1.42934e+09	0.999727	2.21158e+09	17.6301	chng	Cardiac table	surface	high	swab	NA	Standard ward	N	Singapore	Illumina HiSeq 2000
ERR3209831	0.91718	0.924015	1.32779e+09	0.99722	7.00156e+08	16.3988	chng	Cardiac table	surface	high	swab	NA	Standard ward	N	Singapore	Illumina HiSeq 2000
ERR3209832	0.62316	0.648992	8.5833e+08	0.99842	1.51303e+10	19.2495	chng	Bedside locker	surface	high	swab	NA	Standard ward	N	Singapore	Illumina HiSeq 2000
ERR3209833	0.63775	0.662868	1.15947e+09	0.999181	1.77069e+10	19.6474	chng	Bedside locker	surface	high	swab	NA	Standard ward	N	Singapore	Illumina HiSeq 2000
ERR3209834	0.44768	0.47967	8.72807e+08	0.999921	5.12628e+10	20.5202	chng	Bedside locker	surface	high	swab	NA	Standard ward	N	Singapore	Illumina HiSeq 2000
ERR3209835	0.54006	0.569403	6.49531e+08	0.99842	2.53417e+10	19.4884	chng	Bedside locker	surface	high	swab	NA	Standard ward	N	Singapore	Illumina HiSeq 2000
ERR3209836	0.58672	0.614212	7.36986e+08	0.99958	1.36028e+10	19.5937	chng	Bedrail	surface	high	swab	NA	Standard ward	N	Singapore	Illumina HiSeq 2000
ERR3209837	0.50335	0.533917	7.8164e+08	0.999955	4.04257e+10	20.0616	chng	Bedrail	surface	high	swab	NA	Standard ward	N	Singapore	Illumina HiSeq 2000
ERR3209838	0.41663	0.449166	5.28997e+08	0.998759	9.99919e+10	20.0856	chng	Bedrail	surface	high	swab	NA	Standard ward	N	Singapore	Illumina HiSeq 2000
ERR3209839	0.52239	0.552349	6.35432e+08	0.999687	3.19756e+10	19.6558	chng	Bedrail	surface	high	swab	NA	Standard ward	N	Singapore	Illumina HiSeq 2000
ERR3209840	0.58496	0.612527	5.64863e+08	0.995901	1.59461e+10	18.8515	chng	Bedrail	surface	high	swab	NA	Standard ward	N	Singapore	Illumina HiSeq 2000
ERR3209841	0.88502	0.894353	1.22547e+09	0.997108	3.45693e+09	17.7793	chng	Cardiac table	surface	high	swab	NA	Standard ward	N	Singapore	Illumina HiSeq 2000
ERR3209842	0.48799	0.519004	9.94445e+08	0.997427	1.38104e+11	20.1176	chng	Cardiac table	surface	high	swab	NA	Standard ward	N	Singapore	Illumina HiSeq 2000
ERR3209843	0.78064	0.79742	1.05933e+09	0.998552	6.70716e+09	18.6014	chng	Cardiac table	surface	high	swab	NA	Standard ward	N	Singapore	Illumina HiSeq 2000
ERR3209844	0.66823	0.691769	1.21125e+09	0.99467	5.05905e+10	18.4429	chng	Cardiac table	surface	high	swab	NA	Standard ward	N	Singapore	Illumina HiSeq 2000
ERR3209845	0.66074	0.684678	8.768e+08	0.996514	1.22026e+10	18.8471	chng	Cardiac table	surface	high	swab	NA	Standard ward	N	Singapore	Illumina HiSeq 2000
ERR3209846	0.42689	0.459266	4.83467e+08	0.999716	2.03602e+10	20.0406	chng	Bedside locker	surface	high	swab	NA	Standard ward	N	Singapore	Illumina HiSeq 2000
ERR3209847	0.38175	0.414664	3.14112e+08	0.999634	1.52986e+10	19.8545	chng	Bedside locker	surface	high	swab	NA	Standard ward	N	Singapore	Illumina HiSeq 2000
ERR3209848	0.55759	0.586275	9.26563e+08	0.999675	2.33919e+10	19.9737	chng	Bedside locker	surface	high	swab	NA	Standard ward	N	Singapore	Illumina HiSeq 2000
ERR3209849	0.70445	0.725967	6.46771e+08	0.999582	7.54364e+09	18.5345	chng	Bedside locker	surface	high	swab	NA	Standard ward	N	Singapore	Illumina HiSeq 2000
ERR3209850	0.79147	0.807527	1.18789e+09	0.998897	5.87943e+09	18.1915	chng	Cardiac table	surface	high	swab	NA	Standard ward	N	Singapore	Illumina HiSeq 2000
ERR3209851	0.60588	0.632522	1.12649e+09	0.999568	7.32259e+10	19.5212	chng	Cardiac table	surface	high	swab	NA	Standard ward	N	Singapore	Illumina HiSeq 2000
ERR3209852	0.96817	0.970863	1.15761e+09	0.999559	3.4381e+08	16.5277	chng	Sink trap	sink	sink	swab	NA	Standard ward	N	Singapore	Illumina HiSeq 2000
ERR3209853	0.48857	0.519567	4.17607e+08	0.999755	1.11356e+10	19.5931	chng	Pulse oxymeter	surface	high	swab	NA	MDRO ward	N	Singapore	Illumina HiSeq 2000
ERR3209854	0.93707	0.942315	1.15132e+09	0.999448	9.67441e+08	17.3762	chng	Aerator	sink	sink	swab	NA	MDRO ward	N	Singapore	Illumina HiSeq 2000
ERR3209855	0.45824	0.490003	6.65702e+08	0.999952	3.92334e+10	20.1846	chng	Bedrail	surface	high	swab	NA	Standard ward	N	Singapore	Illumina HiSeq 2000
ERR3209856	0.46412	0.495747	7.15239e+08	0.999576	9.34583e+10	20.1196	chng	Bedrail	surface	high	swab	NA	Standard ward	N	Singapore	Illumina HiSeq 2000
ERR3209857	0.63871	0.66378	6.63541e+08	0.998373	1.73628e+10	18.748	chng	Bedside locker	surface	high	swab	NA	Standard ward	N	Singapore	Illumina HiSeq 2000
ERR3209858	0.45596	0.487774	5.5581e+08	0.997156	1.51032e+11	19.7869	chng	Bedrail	surface	high	swab	NA	Standard ward	N	Singapore	Illumina HiSeq 2000
ERR3209859	0.49349	0.524348	3.52361e+08	0.998686	2.15731e+10	19.1594	chng	Bedrail	surface	high	swab	NA	Standard ward	N	Singapore	Illumina HiSeq 2000
ERR3209860	0.96946	0.972046	1.10206e+09	0.998607	1.92841e+08	16.45	chng	Sink trap	sink	sink	swab	NA	MDRO ward	N	Singapore	Illumina HiSeq 2000
ERR3209861	0.73551	0.755172	8.32487e+08	0.990746	9.39175e+09	17.2731	chng	Bedrail	surface	high	swab	NA	Standard ward	N	Singapore	Illumina HiSeq 2000
ERR3209862	0.52992	0.559623	3.05982e+08	0.999723	6.48469e+09	19.0989	chng	Pulse oxymeter	surface	high	swab	NA	Standard ward	N	Singapore	Illumina HiSeq 2000
ERR3209863	0.95084	0.954965	1.17038e+09	0.999244	4.8398e+08	17.0547	chng	Sink trap	sink	sink	swab	NA	Standard ward	N	Singapore	Illumina HiSeq 2000
ERR3209864	0.4959	0.526688	5.36458e+08	0.997583	9.93471e+10	19.4801	chng	Bedside locker	surface	high	swab	NA	Standard ward	N	Singapore	Illumina HiSeq 2000
ERR3209865	0.58797	0.615408	1005011394	0.999696	5.5297e+10	19.6605	chng	Cardiac table	surface	high	swab	NA	Standard ward	N	Singapore	Illumina HiSeq 2000
ERR3209866	0.92932	0.935189	1.1487e+09	0.999331	1.45881e+09	17.8148	chng	Aerator	sink	sink	swab	NA	Standard ward	N	Singapore	Illumina HiSeq 2000
ERR3209867	0.40552	0.438204	4.37041e+08	0.999803	4.35053e+10	20.0367	chng	Bedrail	surface	high	swab	NA	Standard ward	N	Singapore	Illumina HiSeq 2000
ERR3209868	0.91099	0.918313	1.06899e+09	0.999718	1.29734e+09	17.2215	chng	Aerator	sink	sink	swab	NA	Isolation room	N	Singapore	Illumina HiSeq 2000
ERR3209869	0.58583	0.61336	8.55626e+08	0.99949	1.67395e+10	19.7859	chng	Bedside locker	surface	high	swab	NA	MDRO ward	N	Singapore	Illumina HiSeq 2000
ERR3209870	0.67088	0.694277	1.26823e+08	0.999717	1.40873e+09	17.402	chng	Sink trap	sink	sink	swab	NA	Isolation room	N	Singapore	Illumina HiSeq 2000
ERR3209871	0.92512	0.931324	1.14987e+09	0.999732	8.87049e+08	16.6641	chng	Aerator	sink	sink	swab	NA	Isolation room	N	Singapore	Illumina HiSeq 2000
ERR3209872	0.69474	0.716814	1.12204e+09	0.999413	9.63106e+09	19.6099	chng	Bedside locker	surface	high	swab	NA	Standard ward	N	Singapore	Illumina HiSeq 2000
ERR3209873	0.70893	0.730186	1.11743e+09	0.999306	9.49528e+09	19.4875	chng	Cardiac table	surface	high	swab	NA	MDRO ward	N	Singapore	Illumina HiSeq 2000
ERR3209874	0.46021	0.491928	2.98854e+08	0.999628	1.51773e+10	19.3138	chng	Bedrail	surface	high	swab	NA	MDRO ward	N	Singapore	Illumina HiSeq 2000
ERR3209875	0.33394	0.366924	8.64497e+07	0.999738	4.85615e+09	18.7838	chng	Cardiac table	surface	high	swab	NA	Standard ward	N	Singapore	Illumina HiSeq 2000
ERR3209876	0.44886	0.480826	5.86331e+08	0.999661	9.34796e+10	20.0051	chng	Cardiac table	surface	high	swab	NA	Isolation room	N	Singapore	Illumina HiSeq 2000
ERR3209877	0.73274	0.752572	7.28062e+08	0.994378	8.30722e+09	17.6385	chng	Cardiac table	surface	high	swab	NA	Standard ward	N	Singapore	Illumina HiSeq 2000
ERR3209878	0.41003	0.442657	5.70598e+08	0.999824	3.44741e+10	20.2991	chng	Cardiac table	surface	high	swab	NA	Standard ward	N	Singapore	Illumina HiSeq 2000
ERR3209879	0.88929	0.898296	1.33109e+09	0.991024	4.9293e+08	15.4636	chng	Cardiac table	surface	high	swab	NA	Isolation room	N	Singapore	Illumina HiSeq 2000
ERR3209880	0.63419	0.659485	5.88552e+08	0.992313	4.11566e+10	17.9657	chng	Bedrail	surface	high	swab	NA	Isolation room	N	Singapore	Illumina HiSeq 2000
ERR3209881	0.80551	0.820612	8.64934e+08	0.995264	2.85255e+09	17.1656	chng	Sink trap	sink	sink	swab	NA	Isolation room	N	Singapore	Illumina HiSeq 2000
ERR3209882	0.85237	0.864143	8.38294e+08	0.989834	5.53287e+08	16.0528	chng	Cardiac table	surface	high	swab	NA	Isolation room	N	Singapore	Illumina HiSeq 2000
ERR3209883	0.45715	0.488937	3.13032e+08	0.999865	1.49596e+10	19.4187	chng	Bedrail	surface	high	swab	NA	MDRO ward	N	Singapore	Illumina HiSeq 2000
ERR3209884	0.49268	0.523561	4.95554e+08	0.999703	1.82611e+10	19.68	chng	Bedside locker	surface	high	swab	NA	MDRO ward	N	Singapore	Illumina HiSeq 2000
ERR3209885	0.55151	0.580429	1.55581e+08	0.99935	3.66338e+09	18.1514	chng	Bedside locker	surface	high	swab	NA	Isolation room	N	Singapore	Illumina HiSeq 2000
ERR3209886	0.5738	0.601836	3.39572e+08	0.996441	2.34639e+10	18.3576	chng	Bedrail	surface	high	swab	NA	Isolation room	N	Singapore	Illumina HiSeq 2000
ERR3209887	0.9447	0.949327	1.15899e+09	0.999028	2.36895e+08	16.3892	chng	Sink trap	sink	sink	swab	NA	Standard ward	N	Singapore	Illumina HiSeq 2000
ERR3209888	0.49366	0.524513	4.68434e+08	0.999797	1.4952e+10	19.6515	chng	Bedside locker	surface	high	swab	NA	Standard ward	N	Singapore	Illumina HiSeq 2000
ERR3209889	0.54638	0.575491	5.94138e+08	0.999754	3.13489e+10	19.4307	chng	Bedrail	surface	high	swab	NA	Standard ward	N	Singapore	Illumina HiSeq 2000
ERR3209890	0.48685	0.517895	3.72767e+08	0.999428	2.02577e+10	19.3364	chng	Bedrail	surface	high	swab	NA	Standard ward	N	Singapore	Illumina HiSeq 2000
ERR3209891	0.25604	0.287821	8.82825e+07	0.999682	7.60806e+09	19.2387	chng	Bedside locker	surface	high	swab	NA	Standard ward	N	Singapore	Illumina HiSeq 2000
ERR3209892	0.52406	0.553963	8.05075e+08	0.999515	3.1862e+10	19.9031	chng	Cardiac table	surface	high	swab	NA	Standard ward	N	Singapore	Illumina HiSeq 2000
ERR3209893	0.79679	0.812487	1.04358e+09	0.992786	4.52333e+09	17.114	chng	Cardiac table	surface	high	swab	NA	Standard ward	N	Singapore	Illumina HiSeq 2000
ERR3209894	0.67186	0.695204	9.52489e+08	0.995247	1.94944e+10	18.4946	chng	Bedside locker	surface	high	swab	NA	Standard ward	N	Singapore	Illumina HiSeq 2000
ERR3209895	0.46653	0.4981	2.94973e+08	0.999671	1.00774e+10	19.3576	chng	Bedside locker	surface	high	swab	NA	Isolation room	N	Singapore	Illumina HiSeq 2000
ERR3209896	0.63921	0.664255	9.2278e+08	0.999482	1.09157e+10	19.5567	chng	Bedside locker	surface	high	swab	NA	Standard ward	N	Singapore	Illumina HiSeq 2000
ERR3209897	0.75607	0.774446	1.10222e+09	0.999365	6.43346e+09	18.8838	chng	Bedside locker	surface	high	swab	NA	Standard ward	N	Singapore	Illumina HiSeq 2000
ERR3209898	0.30682	0.339586	2.91453e+08	0.999779	1.92903e+10	20.1532	chng	Bedrail	surface	high	swab	NA	MDRO ward	N	Singapore	Illumina HiSeq 2000
ERR3209899	0.896	0.90449	1.14175e+09	0.998491	8.34001e+08	17.4163	chng	Cardiac table	surface	high	swab	NA	Standard ward	N	Singapore	Illumina HiSeq 2000
ERR3209900	0.70373	0.725289	6.63073e+08	0.999212	5.85339e+09	18.785	chng	Cardiac table	surface	high	swab	NA	Isolation room	N	Singapore	Illumina HiSeq 2000
ERR3209901	0.53339	0.562971	5.79985e+08	0.999536	1.54236e+10	19.6836	chng	Bedside locker	surface	high	swab	NA	MDRO ward	N	Singapore	Illumina HiSeq 2000
ERR3209902	0.41827	0.450782	5.1678e+08	0.999468	4.27826e+10	20.0849	chng	Cardiac table	surface	high	swab	NA	MDRO ward	N	Singapore	Illumina HiSeq 2000
ERR3209903	0.4791	0.510354	7.78256e+08	0.996945	2.36088e+11	20.2194	chng	Cardiac table	surface	high	swab	NA	MDRO ward	N	Singapore	Illumina HiSeq 2000
ERR3209904	0.48202	0.513196	7.403e+08	0.999748	1.90745e+10	20.2138	chng	Cardiac table	surface	high	swab	NA	MDRO ward	N	Singapore	Illumina HiSeq 2000
ERR3209905	0.41212	0.444719	4.73381e+08	0.999796	3.34865e+10	20.0825	chng	Cardiac table	surface	high	swab	NA	MDRO ward	N	Singapore	Illumina HiSeq 2000
ERR3209906	0.4511	0.483019	4.0303e+08	0.999691	1.49424e+10	19.7096	chng	Bedside locker	surface	high	swab	NA	Standard ward	N	Singapore	Illumina HiSeq 2000
ERR3209907	0.51691	0.54705	7.71558e+08	0.999831	2.61851e+10	19.998	chng	Bedside locker	surface	high	swab	NA	Standard ward	N	Singapore	Illumina HiSeq 2000
ERR3209908	0.87178	0.882114	5.98813e+08	0.999039	1.24959e+09	16.9191	chng	Cardiac table	surface	high	swab	NA	Standard ward	N	Singapore	Illumina HiSeq 2000
ERR3209909	0.80278	0.818069	8.63767e+08	0.996965	5.00305e+09	17.4547	chng	Cardiac table	surface	high	swab	NA	Standard ward	N	Singapore	Illumina HiSeq 2000
ERR3209910	0.41944	0.451934	9.26415e+07	0.999732	3.61989e+09	18.4133	chng	Pulse oxymeter	surface	high	swab	NA	Standard ward	N	Singapore	Illumina HiSeq 2000
ERR3209911	0.84602	0.858257	1.3206e+09	0.998661	2.79856e+09	18.1868	chng	Cardiac table	surface	high	swab	NA	Standard ward	N	Singapore	Illumina HiSeq 2000
ERR3209912	0.52834	0.558097	7.99225e+08	0.99962	3.01969e+10	19.9426	chng	Bedside locker	surface	high	swab	NA	Standard ward	N	Singapore	Illumina HiSeq 2000
ERR3209913	0.42637	0.458755	1.80155e+08	0.999681	8.36854e+09	19.0232	chng	Bedrail	surface	high	swab	NA	Standard ward	N	Singapore	Illumina HiSeq 2000
ERR3209914	0.63525	0.660492	2.83356e+08	0.999558	3.73177e+09	18.3728	chng	Bedrail	surface	high	swab	NA	MDRO ward	N	Singapore	Illumina HiSeq 2000
ERR3209915	0.73729	0.756843	1.0112e+09	0.999189	7.29621e+09	18.8744	chng	Bedside locker	surface	high	swab	NA	Standard ward	N	Singapore	Illumina HiSeq 2000
ERR3209916	0.70022	0.721981	2.53188e+08	0.999038	2.26038e+09	17.6927	chng	Bedrail	surface	high	swab	NA	MDRO ward	N	Singapore	Illumina HiSeq 2000
ERR3209917	0.5203	0.550329	1.7475e+08	0.999552	3.83674e+09	18.6061	chng	Bedside locker	surface	high	swab	NA	MDRO ward	N	Singapore	Illumina HiSeq 2000
ERR3209918	0.47228	0.503709	3.09315e+08	0.998296	1.91486e+10	19.3384	chng	Bedrail	surface	high	swab	NA	Standard ward	N	Singapore	Illumina HiSeq 2000
ERR3209919	0.94158	0.94646	1.12691e+09	0.99911	2.98189e+08	16.4053	chng	Sink trap	sink	sink	swab	NA	Standard ward	N	Singapore	Illumina HiSeq 2000
ERR3209920	0.40148	0.434212	1.45313e+08	0.999644	6.16221e+09	18.9841	chng	Pulse oxymeter	surface	high	swab	NA	MDRO ward	N	Singapore	Illumina HiSeq 2000
ERR3209921	0.74096	0.760286	5.83513e+08	0.999516	4.86176e+09	18.3318	chng	Bedrail	surface	high	swab	NA	MDRO ward	N	Singapore	Illumina HiSeq 2000
ERR3209922	0.545	0.574163	7.73583e+08	0.999764	2.03166e+10	19.9405	chng	Bedrail	surface	high	swab	NA	Standard ward	N	Singapore	Illumina HiSeq 2000
ERR3209923	0.74519	0.764252	6.28705e+08	0.999816	4.58442e+09	18.5806	chng	Bedside locker	surface	high	swab	NA	Standard ward	N	Singapore	Illumina HiSeq 2000
ERR3209924	0.89195	0.900752	2.06763e+09	0.999635	3.84487e+09	17.6762	chng	Cardiac table	surface	high	swab	NA	Standard ward	N	Singapore	Illumina HiSeq 2000
ERR3209925	0.82847	0.841967	2.52079e+09	0.999399	9.07522e+09	19.5519	chng	Bedside locker	surface	high	swab	NA	MDRO ward	N	Singapore	Illumina HiSeq 2000
ERR3209926	0.68212	0.704902	1.59682e+09	0.999576	5.03144e+10	19.5111	chng	Bedrail	surface	high	swab	NA	Standard ward	N	Singapore	Illumina HiSeq 2000
ERR3209927	0.65253	0.676897	1.4309e+09	0.999597	1.41266e+10	20.1213	chng	Bedrail	surface	high	swab	NA	MDRO ward	N	Singapore	Illumina HiSeq 2000
ERR3209928	0.66128	0.68519	1.24178e+09	0.999516	1.30078e+10	19.9225	chng	Bedside locker	surface	high	swab	NA	MDRO ward	N	Singapore	Illumina HiSeq 2000
ERR3209929	0.7192	0.73985	4.77605e+08	0.999823	4.15944e+09	18.4353	chng	Bedrail	surface	high	swab	NA	MDRO ward	N	Singapore	Illumina HiSeq 2000
ERR3209930	0.6275	0.653123	7.38746e+08	0.999591	1.0266e+10	19.5031	chng	Bedside locker	surface	high	swab	NA	MDRO ward	N	Singapore	Illumina HiSeq 2000
ERR3209931	0.76176	0.779772	1.74358e+09	0.99969	1.41491e+10	19.4329	chng	Cardiac table	surface	high	swab	NA	MDRO ward	N	Singapore	Illumina HiSeq 2000
ERR3209932	0.91896	0.925654	2.53488e+09	0.999435	1.66327e+09	17.8377	chng	Cardiac table	surface	high	swab	NA	MDRO ward	N	Singapore	Illumina HiSeq 2000
ERR3209933	0.63309	0.658439	1.07639e+09	0.999514	1.22837e+10	19.9439	chng	Cardiac table	surface	high	swab	NA	MDRO ward	N	Singapore	Illumina HiSeq 2000
ERR3209934	0.55312	0.581977	1.06042e+09	0.999695	8.82406e+10	19.948	chng	Cardiac table	surface	high	swab	NA	Standard ward	N	Singapore	Illumina HiSeq 2000
ERR3209935	0.38323	0.416133	1.98915e+08	0.999807	1.25664e+10	19.3675	chng	Bedrail	surface	high	swab	NA	MDRO ward	N	Singapore	Illumina HiSeq 2000
ERR3209936	0.75039	0.769126	1.11437e+09	0.989368	1.01784e+10	17.4257	chng	Cardiac table	surface	high	swab	NA	MDRO ward	N	Singapore	Illumina HiSeq 2000
ERR3209937	0.51349	0.54374	3.39427e+08	0.999765	1.0241e+10	19.2026	chng	Bedrail	surface	high	swab	NA	MDRO ward	N	Singapore	Illumina HiSeq 2000
ERR3209938	0.55414	0.582958	2.75034e+08	0.999833	7.9568e+09	18.7449	chng	Pulse oxymeter	surface	high	swab	NA	Standard ward	N	Singapore	Illumina HiSeq 2000
ERR3209939	0.40498	0.437671	9.01348e+08	0.999657	4.25266e+10	20.809	chng	Cardiac table	surface	high	swab	NA	Standard ward	N	Singapore	Illumina HiSeq 2000
ERR3209940	0.55	0.578976	1.05024e+09	0.999931	3.95369e+10	20.0803	chng	Cardiac table	surface	high	swab	NA	Standard ward	N	Singapore	Illumina HiSeq 2000
ERR3209941	0.7926	0.808581	9.14865e+08	0.997734	3.10198e+09	18.0995	chng	Bedside locker	surface	high	swab	NA	MDRO ward	N	Singapore	Illumina HiSeq 2000
ERR3209942	0.71754	0.738289	9.68048e+08	0.991457	1.44298e+10	17.7739	chng	Bedrail	surface	high	swab	NA	Standard ward	N	Singapore	Illumina HiSeq 2000
ERR3209943	0.85885	0.870147	1.15602e+09	0.999104	2.38833e+09	17.8825	chng	Aerator	sink	sink	swab	NA	MDRO ward	N	Singapore	Illumina HiSeq 2000
ERR3209944	0.57881	0.606638	6.91562e+08	0.999652	1.68125e+10	19.4915	chng	Bedside locker	surface	high	swab	NA	MDRO ward	N	Singapore	Illumina HiSeq 2000
ERR3209945	0.6362	0.661395	2.83432e+08	0.999633	3.6405e+09	18.3806	chng	Bedrail	surface	high	swab	NA	MDRO ward	N	Singapore	Illumina HiSeq 2000
ERR3209946	0.5261	0.555934	1.74012e+08	0.999771	4.31962e+09	18.5207	chng	Pulse oxymeter	surface	high	swab	NA	MDRO ward	N	Singapore	Illumina HiSeq 2000
ERR3209947	0.41355	0.446129	2.94355e+08	0.999702	1.33188e+10	19.6212	chng	Bedrail	surface	high	swab	NA	Isolation room	N	Singapore	Illumina HiSeq 2000
ERR3209948	0.85329	0.864996	4.74699e+08	0.999457	1.24093e+09	17.7117	chng	Aerator	sink	sink	swab	NA	Standard ward	N	Singapore	Illumina HiSeq 2000
ERR3209949	0.48431	0.515425	4.11504e+08	0.999702	1.57586e+10	19.5302	chng	Bedside locker	surface	high	swab	NA	Isolation room	N	Singapore	Illumina HiSeq 2000
ERR3209950	0.40132	0.434053	2.88362e+08	0.998916	3.40947e+10	19.578	chng	Bedrail	surface	high	swab	NA	MDRO ward	N	Singapore	Illumina HiSeq 2000
ERR3209951	0.44366	0.475731	2.98923e+08	0.998627	2.31231e+10	19.3167	chng	Bedrail	surface	high	swab	NA	Standard ward	N	Singapore	Illumina HiSeq 2000
ERR3209952	0.30194	0.334646	1.17862e+08	0.999745	8.33055e+09	19.2816	chng	Bedside locker	surface	high	swab	NA	MDRO ward	N	Singapore	Illumina HiSeq 2000
ERR3209953	0.86049	0.871666	9.65229e+08	0.996975	1.08257e+09	17.3624	chng	Cardiac table	surface	high	swab	NA	MDRO ward	N	Singapore	Illumina HiSeq 2000
ERR3209954	0.58426	0.611857	1.56475e+08	0.999621	2.88391e+09	18.0777	chng	Bedrail	surface	high	swab	NA	MDRO ward	N	Singapore	Illumina HiSeq 2000
ERR3209955	0.42621	0.458598	2.31806e+08	0.999765	1.00431e+10	19.2845	chng	Bedrail	surface	high	swab	NA	MDRO ward	N	Singapore	Illumina HiSeq 2000
ERR3209956	0.39717	0.429949	1.84499e+08	0.999659	8.53174e+09	19.1986	chng	Bedrail	surface	high	swab	NA	MDRO ward	N	Singapore	Illumina HiSeq 2000
ERR3209957	0.57974	0.607529	5.1663e+08	0.999754	1.12898e+10	19.2454	chng	Bedside locker	surface	high	swab	NA	MDRO ward	N	Singapore	Illumina HiSeq 2000
ERR3209958	0.78182	0.798522	8.13805e+08	0.998052	4.14918e+09	18.0309	chng	Cardiac table	surface	high	swab	NA	MDRO ward	N	Singapore	Illumina HiSeq 2000
ERR3209959	0.48621	0.517273	3.51809e+08	0.999388	1.35693e+10	19.3193	chng	Bedside locker	surface	high	swab	NA	MDRO ward	N	Singapore	Illumina HiSeq 2000
ERR3209960	0.33335	0.366331	4.15131e+08	0.997712	1.19465e+11	20.5915	chng	Cardiac table	surface	high	swab	NA	MDRO ward	N	Singapore	Illumina HiSeq 2000
ERR3209961	0.51531	0.545502	3.50856e+08	0.999627	8.34885e+09	19.2731	chng	Bedside locker	surface	high	swab	NA	MDRO ward	N	Singapore	Illumina HiSeq 2000
ERR3209962	0.84756	0.859685	4.62005e+08	0.999622	1.20452e+09	17.5774	chng	Aerator	sink	sink	swab	NA	MDRO ward	N	Singapore	Illumina HiSeq 2000
ERR3209963	0.438	0.47018	2.69684e+08	0.999708	9.99371e+09	19.3775	chng	Bedside locker	surface	high	swab	NA	MDRO ward	N	Singapore	Illumina HiSeq 2000
ERR3209964	0.34828	0.381301	1.73024e+08	0.999167	1.74413e+10	19.5018	chng	Bedside locker	surface	high	swab	NA	MDRO ward	N	Singapore	Illumina HiSeq 2000
ERR3209965	0.4741	0.505483	5.92219e+08	0.999873	2.79568e+10	19.9726	chng	Cardiac table	surface	high	swab	NA	MDRO ward	N	Singapore	Illumina HiSeq 2000
ERR3209966	0.92805	0.93402	5.23992e+08	0.999361	3.76671e+08	16.7461	chng	Sink trap	sink	sink	swab	NA	MDRO ward	N	Singapore	Illumina HiSeq 2000
ERR3209967	0.41699	0.44952	3.02076e+08	0.999586	2.00172e+10	19.5716	chng	Bedrail	surface	high	swab	NA	Isolation room	N	Singapore	Illumina HiSeq 2000
ERR3209968	0.39227	0.425097	1.07388e+08	0.999691	5.80518e+09	18.7159	chng	Bedrail	surface	high	swab	NA	MDRO ward	N	Singapore	Illumina HiSeq 2000
ERR3209969	0.80727	0.82225	5.13379e+08	0.999201	2.42568e+09	17.1912	chng	Aerator	sink	sink	swab	NA	Isolation room	N	Singapore	Illumina HiSeq 2000
ERR3209970	0.61231	0.638655	4.97643e+08	0.999276	8.95885e+09	18.9299	chng	Bedside locker	surface	high	swab	NA	Isolation room	N	Singapore	Illumina HiSeq 2000
ERR3209971	0.5335	0.563078	3.99143e+08	0.999654	8.68118e+09	19.3252	chng	Bedside locker	surface	high	swab	NA	MDRO ward	N	Singapore	Illumina HiSeq 2000
ERR3209972	0.56061	0.589177	3.98453e+08	0.999564	7.59794e+09	19.184	chng	Bedrail	surface	high	swab	NA	MDRO ward	N	Singapore	Illumina HiSeq 2000
ERR3209973	0.71435	0.735288	2.1478e+08	0.999464	1.52954e+09	17.7912	chng	Bedrail	surface	high	swab	NA	MDRO ward	N	Singapore	Illumina HiSeq 2000
ERR3209974	0.59123	0.618526	4.42433e+08	0.9994	9.71567e+09	18.9335	chng	Door handle	surface	high	swab	NA	Isolation room	N	Singapore	Illumina HiSeq 2000
ERR3209975	0.74719	0.766127	5.73686e+08	0.999257	3.44395e+09	18.3878	chng	Bedside locker	surface	high	swab	NA	MDRO ward	N	Singapore	Illumina HiSeq 2000
ERR3209976	0.80821	0.823126	3.63744e+08	0.999549	1.81643e+09	17.187	chng	Pulse oxymeter	surface	high	swab	NA	Isolation room	N	Singapore	Illumina HiSeq 2000
ERR3209977	0.58126	0.608985	5.11279e+08	0.9995	8.61404e+09	19.3513	chng	Bedside locker	surface	high	swab	NA	MDRO ward	N	Singapore	Illumina HiSeq 2000
ERR3209978	0.9706	0.973091	6.18591e+08	0.998678	2.42338e+08	16.5207	chng	Sink trap	sink	sink	swab	NA	MDRO ward	N	Singapore	Illumina HiSeq 2000
ERR3209979	0.82146	0.835453	5.48541e+08	0.999821	2.52399e+09	17.7493	chng	Cardiac table	surface	high	swab	NA	MDRO ward	N	Singapore	Illumina HiSeq 2000
ERR3209980	0.82457	0.838343	3.91742e+08	0.999553	1.3483e+09	17.4567	chng	Cardiac table	surface	high	swab	NA	MDRO ward	N	Singapore	Illumina HiSeq 2000
ERR3209981	0.60167	0.628503	5.56792e+08	0.992857	6.06991e+10	18.9494	chng	Cardiac table	surface	high	swab	NA	Standard ward	N	Singapore	Illumina HiSeq 2000
ERR3209982	0.48601	0.517078	4.82192e+08	0.999063	2.4745e+10	19.574	chng	Bedrail	surface	high	swab	NA	Standard ward	N	Singapore	Illumina HiSeq 2000
ERR3209983	0.29458	0.327181	1.24284e+08	0.999762	9.38373e+09	19.3714	chng	Bedside locker	surface	high	swab	NA	MDRO ward	N	Singapore	Illumina HiSeq 2000
ERR3209984	0.65534	0.679561	3.95858e+08	0.999051	4.94571e+09	18.7472	chng	Cardiac table	surface	high	swab	NA	MDRO ward	N	Singapore	Illumina HiSeq 2000
ERR3209985	0.6679	0.691457	3.31493e+08	0.993187	3.59003e+09	17.4882	chng	Bedrail	surface	high	swab	NA	MDRO ward	N	Singapore	Illumina HiSeq 2000
ERR3209986	0.38629	0.419169	4.54108e+08	0.999748	4.71105e+10	20.2105	chng	Cardiac table	surface	high	swab	NA	MDRO ward	N	Singapore	Illumina HiSeq 2000
ERR3209987	0.914	0.921086	6.06345e+08	0.999157	7.67086e+08	17.4928	chng	Sink trap	sink	sink	swab	NA	MDRO ward	N	Singapore	Illumina HiSeq 2000
ERR3209988	0.37404	0.407001	1.26993e+08	0.999793	6.43843e+09	18.9712	chng	Bedrail	surface	high	swab	NA	MDRO ward	N	Singapore	Illumina HiSeq 2000
ERR3209989	0.71265	0.733688	2.6758e+08	0.994048	1.69732e+09	17.0973	chng	Bedrail	surface	high	swab	NA	MDRO ward	N	Singapore	Illumina HiSeq 2000
ERR3209990	0.93364	0.939162	6.03253e+08	0.997369	4.66472e+08	16.531	chng	Sink trap	sink	sink	swab	NA	MDRO ward	N	Singapore	Illumina HiSeq 2000
ERR3209991	0.9256	0.931766	6.42148e+08	0.998397	1.14637e+09	17.9619	chng	Cardiac table	surface	high	swab	NA	MDRO ward	N	Singapore	Illumina HiSeq 2000
ERR3209992	0.32112	0.354026	4.28857e+08	0.999238	8.41882e+10	20.5866	chng	Cardiac table	surface	high	swab	NA	MDRO ward	N	Singapore	Illumina HiSeq 2000
ERR3209993	0.61642	0.642573	5.37514e+08	0.999414	7.42331e+09	19.2726	chng	Bedside locker	surface	high	swab	NA	MDRO ward	N	Singapore	Illumina HiSeq 2000
ERR3209994	0.40152	0.434251	2.03732e+08	0.999764	7.23793e+09	19.3182	chng	Pulse oxymeter	surface	high	swab	NA	MDRO ward	N	Singapore	Illumina HiSeq 2000
ERR3209995	0.47908	0.510334	3.62008e+08	0.997017	4.99973e+10	19.1474	chng	Door handle	surface	high	swab	NA	Isolation room	N	Singapore	Illumina HiSeq 2000
ERR3209996	0.95527	0.959032	4.96365e+08	0.997767	5.93723e+07	15.2966	chng	Cardiac table	surface	high	swab	NA	MDRO ward	N	Singapore	Illumina HiSeq 2000
ERR3209997	0.67294	0.696225	2.99222e+08	0.998164	4.43613e+09	17.6992	chng	Cardiac table	surface	high	swab	NA	MDRO ward	N	Singapore	Illumina HiSeq 2000
ERR3209998	0.59912	0.626067	3.30117e+08	0.99528	1.63876e+10	18.064	chng	Bedrail	surface	high	swab	NA	MDRO ward	N	Singapore	Illumina HiSeq 2000
ERR3209999	0.4243	0.456719	1.32844e+08	0.99969	6.32909e+09	18.7393	chng	Bedrail	surface	high	swab	NA	MDRO ward	N	Singapore	Illumina HiSeq 2000
ERR3210000	0.22172	0.252341	5.18979e+07	0.999816	5.92311e+09	18.9138	chng	Bedrail	surface	high	swab	NA	MDRO ward	N	Singapore	Illumina HiSeq 2000
ERR3210001	0.66879	0.692299	4.73608e+08	0.999844	7.5708e+09	18.5754	chng	Pulse oxymeter	surface	high	swab	NA	Isolation room	N	Singapore	Illumina HiSeq 2000
ERR3210002	0.3537	0.386722	2.4842e+08	0.999655	3.45079e+10	19.8125	chng	Cardiac table	surface	high	swab	NA	Isolation room	N	Singapore	Illumina HiSeq 2000
ERR3210003	0.5894	0.616776	3.3765e+08	0.999394	6.02834e+09	18.8514	chng	Sink trap	sink	sink	swab	NA	Isolation room	N	Singapore	Illumina HiSeq 2000
ERR3210004	0.40573	0.438411	4.05452e+07	0.999808	2.29115e+09	17.6725	chng	Bedrail	surface	high	swab	NA	MDRO ward	N	Singapore	Illumina HiSeq 2000
ERR3210005	0.25805	0.289886	1.07003e+08	0.999824	1.06723e+10	19.4409	chng	Bedside locker	surface	high	swab	NA	MDRO ward	N	Singapore	Illumina HiSeq 2000
ERR3210006	0.51457	0.544786	2.55667e+08	0.999338	1.21892e+10	18.7712	chng	Pulse oxymeter	surface	high	swab	NA	Standard ward	N	Singapore	Illumina HiSeq 2000
ERR3210007	0.55757	0.586256	5.79515e+08	0.999393	1.34952e+10	19.5732	chng	Bedside locker	surface	high	swab	NA	MDRO ward	N	Singapore	Illumina HiSeq 2000
ERR3210008	0.80698	0.82198	5.70148e+08	0.993696	1.74278e+09	16.7003	chng	Cardiac table	surface	high	swab	NA	MDRO ward	N	Singapore	Illumina HiSeq 2000
ERR3210009	0.60966	0.636128	4.45874e+08	0.998912	9.45329e+09	19.0164	chng	Bedside locker	surface	high	swab	NA	MDRO ward	N	Singapore	Illumina HiSeq 2000
ERR3210010	0.2699	0.302031	1.15025e+08	0.999768	9.7359e+09	19.4166	chng	Bedrail	surface	high	swab	NA	MDRO ward	N	Singapore	Illumina HiSeq 2000
ERR3210011	0.95087	0.954993	5.32942e+08	0.99897	1.87822e+08	16.3234	chng	Sink trap	sink	sink	swab	NA	MDRO ward	N	Singapore	Illumina HiSeq 2000
ERR3210012	0.62655	0.652219	4.46172e+08	0.999657	9.6723e+09	18.7106	chng	Bedside locker	surface	high	swab	NA	MDRO ward	N	Singapore	Illumina HiSeq 2000
ERR3210013	0.48282	0.513975	3.86224e+08	0.999801	1.42539e+10	19.5051	chng	Bedside locker	surface	high	swab	NA	MDRO ward	N	Singapore	Illumina HiSeq 2000
ERR3210014	0.33522	0.368209	2.24211e+08	0.999809	2.4096e+10	19.7767	chng	Bedrail	surface	high	swab	NA	MDRO ward	N	Singapore	Illumina HiSeq 2000
ERR3210015	0.27721	0.3095	2.09935e+08	0.99972	1.97095e+10	20.0262	chng	Bedside locker	surface	high	swab	NA	MDRO ward	N	Singapore	Illumina HiSeq 2000
ERR3210016	0.84553	0.857802	5.26848e+08	0.99961	2.10014e+09	17.4974	chng	Aerator	sink	sink	swab	NA	MDRO ward	N	Singapore	Illumina HiSeq 2000
ERR3210017	0.49809	0.528814	3.74205e+08	0.999339	1.58604e+10	19.3945	chng	Cardiac table	surface	high	swab	NA	MDRO ward	N	Singapore	Illumina HiSeq 2000
ERR3210018	0.3625	0.395508	3.11634e+08	0.999419	7.3992e+10	20.0474	chng	Cardiac table	surface	high	swab	NA	MDRO ward	N	Singapore	Illumina HiSeq 2000
ERR3210019	0.82203	0.835982	5.01696e+08	0.999304	1.65649e+09	17.6865	chng	Aerator	sink	sink	swab	NA	MDRO ward	N	Singapore	Illumina HiSeq 2000
ERR3210020	0.52124	0.551237	3.33149e+08	0.999312	9.54467e+09	19.2449	chng	Bedside locker	surface	high	swab	NA	MDRO ward	N	Singapore	Illumina HiSeq 2000
ERR3210021	0.54998	0.578957	4.88248e+08	0.999661	1.23549e+10	19.3865	chng	Cardiac table	surface	high	swab	NA	MDRO ward	N	Singapore	Illumina HiSeq 2000
ERR3210022	0.71913	0.739784	3.61445e+08	0.999162	3.20157e+09	17.8281	chng	Cardiac table	surface	high	swab	NA	MDRO ward	N	Singapore	Illumina HiSeq 2000
ERR3210023	0.20781	0.237829	3.44005e+07	0.99982	3.86832e+09	18.5633	chng	Bedrail	surface	high	swab	NA	MDRO ward	N	Singapore	Illumina HiSeq 2000
ERR3210024	0.82377	0.8376	5.1598e+08	0.993901	1.12691e+09	16.5273	chng	Cardiac table	surface	high	swab	NA	MDRO ward	N	Singapore	Illumina HiSeq 2000
ERR3210025	0.32606	0.359001	2.62334e+08	0.999761	2.06172e+10	19.9528	chng	Bedrail	surface	high	swab	NA	MDRO ward	N	Singapore	Illumina HiSeq 2000
ERR3210026	0.35483	0.387851	1.69533e+08	0.999766	1.53943e+10	19.3834	chng	Bedside locker	surface	high	swab	NA	MDRO ward	N	Singapore	Illumina HiSeq 2000
ERR3210027	0.89255	0.901306	4.79957e+08	0.999256	1.01559e+09	17.1074	chng	Aerator	sink	sink	swab	NA	Isolation room	N	Singapore	Illumina HiSeq 2000
ERR3210028	0.1635	0.191012	5.66311e+07	0.999733	9.52951e+09	19.3972	chng	Pulse oxymeter	surface	high	swab	NA	MDRO ward	N	Singapore	Illumina HiSeq 2000
ERR3210029	0.3373	0.370297	9.96479e+07	0.999758	6.03383e+09	18.9162	chng	Bedside locker	surface	high	swab	NA	MDRO ward	N	Singapore	Illumina HiSeq 2000
ERR3210030	0.51729	0.547418	4.85814e+08	0.999521	1.77185e+10	19.462	chng	Cardiac table	surface	high	swab	NA	MDRO ward	N	Singapore	Illumina HiSeq 2000
ERR3210031	0.31059	0.343399	2.71379e+08	0.999719	2.36136e+10	20.0729	chng	Bedrail	surface	high	swab	NA	MDRO ward	N	Singapore	Illumina HiSeq 2000
ERR3210032	0.4462	0.47822	2.63474e+08	0.999052	1.52771e+10	19.2182	chng	Bedrail	surface	high	swab	NA	MDRO ward	N	Singapore	Illumina HiSeq 2000
ERR3210033	0.91825	0.925	4.66159e+08	0.998806	7.38026e+07	15.4538	chng	Cardiac table	surface	high	swab	NA	MDRO ward	N	Singapore	Illumina HiSeq 2000
ERR3210034	0.4203	0.452781	3.35646e+08	0.999723	1.69272e+10	19.6783	chng	Bedrail	surface	high	swab	NA	MDRO ward	N	Singapore	Illumina HiSeq 2000
ERR3210035	0.70732	0.72867	7.64391e+07	0.998989	5.58476e+08	16.5246	chng	Bedrail	surface	high	swab	NA	MDRO ward	N	Singapore	Illumina HiSeq 2000
ERR3210036	0.55631	0.585045	4.49889e+08	0.99981	1.67331e+10	19.1756	chng	Bedside locker	surface	high	swab	NA	MDRO ward	N	Singapore	Illumina HiSeq 2000
ERR3210037	0.12604	0.150576	7.26968e+07	0.999833	1.88554e+10	19.9852	chng	Bedside locker	surface	high	swab	NA	MDRO ward	N	Singapore	Illumina HiSeq 2000
ERR3210038	0.35661	0.389629	1.64727e+08	0.999749	1.11781e+10	19.3172	chng	Bedrail	surface	high	swab	NA	MDRO ward	N	Singapore	Illumina HiSeq 2000
ERR3210039	0.5123	0.542588	1.18567e+08	0.999687	2.93331e+09	18.214	chng	Bedrail	surface	high	swab	NA	MDRO ward	N	Singapore	Illumina HiSeq 2000
ERR3210040	0.45758	0.489358	2.01367e+08	0.999645	6.0636e+09	19.049	chng	Bedside locker	surface	high	swab	NA	MDRO ward	N	Singapore	Illumina HiSeq 2000
ERR3210041	0.88285	0.892348	5.54725e+08	0.998276	8.47157e+08	16.6218	chng	Cardiac table	surface	high	swab	NA	MDRO ward	N	Singapore	Illumina HiSeq 2000
ERR3210042	0.64883	0.673388	6.46809e+08	0.998952	9.25679e+09	18.8781	chng	Cardiac table	surface	high	swab	NA	MDRO ward	N	Singapore	Illumina HiSeq 2000
ERR3210043	0.79947	0.814985	7.34875e+08	0.988766	1.65454e+09	16.5193	chng	Cardiac table	surface	high	swab	NA	MDRO ward	N	Singapore	Illumina HiSeq 2000
ERR3210044	0.94335	0.948086	7.55161e+08	0.998722	8.76507e+08	17.5014	chng	Aerator	sink	sink	swab	NA	MDRO ward	N	Singapore	Illumina HiSeq 2000
ERR3210045	0.50468	0.535206	6.35457e+08	0.999906	2.87397e+10	19.8573	chng	Bedside locker	surface	high	swab	NA	Standard ward	N	Singapore	Illumina HiSeq 2000
ERR3210046	0.78385	0.800417	2.20086e+08	0.996023	7.40728e+08	16.4979	chng	Cardiac table	surface	high	swab	NA	MDRO ward	N	Singapore	Illumina HiSeq 2000
ERR3210047	0.69197	0.714201	5.81006e+08	0.999794	7.98172e+09	18.5257	chng	Bedside locker	surface	high	swab	NA	Standard ward	N	Singapore	Illumina HiSeq 2000
ERR3210048	0.92972	0.935557	8.96666e+08	0.997779	8.76458e+08	17.632	chng	Cardiac table	surface	high	swab	NA	MDRO ward	N	Singapore	Illumina HiSeq 2000
ERR3210049	0.76598	0.78372	8.29665e+08	0.999137	4.52466e+09	18.6011	chng	Cardiac table	surface	high	swab	NA	Standard ward	N	Singapore	Illumina HiSeq 2000
ERR3210050	0.33159	0.364563	1.39405e+08	0.999711	1.09552e+10	19.2804	chng	Bedrail	surface	high	swab	NA	Standard ward	N	Singapore	Illumina HiSeq 2000
ERR3210051	0.57021	0.598393	121584700	0.999406	2.08111e+09	18.0282	chng	Bedside locker	surface	high	swab	NA	MDRO ward	N	Singapore	Illumina HiSeq 2000
ERR3210052	0.36121	0.394221	1.35523e+08	0.99976	7.52312e+09	19.1022	chng	Pulse oxymeter	surface	high	swab	NA	MDRO ward	N	Singapore	Illumina HiSeq 2000
ERR3210053	0.46537	0.496967	5.58367e+08	0.99895	4.4244e+10	19.9548	chng	Cardiac table	surface	high	swab	NA	Standard ward	N	Singapore	Illumina HiSeq 2000
ERR3210054	0.25507	0.286824	2.40721e+08	0.999795	1.96931e+10	20.2342	chng	Bedrail	surface	high	swab	NA	Standard ward	N	Singapore	Illumina HiSeq 2000
ERR3210055	0.19542	0.224833	7.01837e+07	0.999817	9.30044e+09	19.382	chng	Bedside locker	surface	high	swab	NA	Standard ward	N	Singapore	Illumina HiSeq 2000
ERR3210056	0.50237	0.532966	5.98587e+08	0.993771	7.48332e+10	19.297	chng	Bedside locker	surface	high	swab	NA	Standard ward	N	Singapore	Illumina HiSeq 2000
ERR3210057	0.4278	0.460161	5.91677e+08	0.9968	1.295e+11	19.9929	chng	Cardiac table	surface	high	swab	NA	Standard ward	N	Singapore	Illumina HiSeq 2000
ERR3210058	0.40562	0.438303	3.24197e+08	0.998005	5.10672e+10	19.6286	chng	Bedside locker	surface	high	swab	NA	Standard ward	N	Singapore	Illumina HiSeq 2000
ERR3210061	0.73975	0.759151	1.08372e+09	0.999378	7.74215e+09	19.0851	chng	Cardiac table	surface	high	swab	NA	MDRO ward	N	Singapore	Illumina HiSeq 2000
ERR3210062	0.6274	0.653027	7.00916e+08	0.99955	9.58641e+09	19.3378	chng	Bedside locker	surface	high	swab	NA	Standard ward	N	Singapore	Illumina HiSeq 2000
ERR3210063	0.51827	0.548365	4.58529e+08	0.9989	2.1402e+10	19.276	chng	Bedrail	surface	high	swab	NA	Standard ward	N	Singapore	Illumina HiSeq 2000
ERR3210064	0.61322	0.639523	7.79531e+08	0.999464	1.24681e+10	19.5325	chng	Bedside locker	surface	high	swab	NA	Standard ward	N	Singapore	Illumina HiSeq 2000
ERR3210065	0.96255	0.96571	7.06488e+08	0.998025	4.68321e+08	17.0862	chng	Sink trap	sink	sink	swab	NA	Standard ward	N	Singapore	Illumina HiSeq 2000
ERR3210066	0.81157	0.826253	3.52557e+08	0.999316	1.47187e+09	17.1841	chng	Aerator	sink	sink	swab	NA	Standard ward	N	Singapore	Illumina HiSeq 2000
ERR3210067	0.70594	0.72737	9.7251e+08	0.999585	9.13976e+09	19.1235	chng	Bedside locker	surface	high	swab	NA	Standard ward	N	Singapore	Illumina HiSeq 2000
ERR3210068	0.41736	0.449885	1.99764e+08	0.999728	9.46883e+09	19.1877	chng	Bedrail	surface	high	swab	NA	Standard ward	N	Singapore	Illumina HiSeq 2000
ERR3210069	0.62109	0.647021	2.79208e+08	0.999527	3.58358e+09	18.5456	chng	Bedside locker	surface	high	swab	NA	MDRO ward	N	Singapore	Illumina HiSeq 2000
ERR3210070	0.80739	0.822362	7.2873e+08	0.994425	2.54905e+09	16.9259	chng	Cardiac table	surface	high	swab	NA	Standard ward	N	Singapore	Illumina HiSeq 2000
ERR3210071	0.8946	0.903198	8.72529e+08	0.999462	1.59372e+09	17.5377	chng	Aerator	sink	sink	swab	NA	MDRO ward	N	Singapore	Illumina HiSeq 2000
ERR3210072	0.77077	0.788199	1.16409e+09	0.989174	8.31545e+09	17.2354	chng	Cardiac table	surface	high	swab	NA	Standard ward	N	Singapore	Illumina HiSeq 2000
ERR3210073	0.44815	0.48013	1.6139e+08	0.999761	5.27228e+09	18.8477	chng	Pulse oxymeter	surface	high	swab	NA	Standard ward	N	Singapore	Illumina HiSeq 2000
ERR3210074	0.33233	0.365306	1.6134e+08	0.999709	9.77018e+09	19.4415	chng	Bedrail	surface	high	swab	NA	Standard ward	N	Singapore	Illumina HiSeq 2000
ERR3210075	0.94052	0.945486	1.01283e+09	0.999385	5.14717e+08	17.0148	chng	Sink trap	sink	sink	swab	NA	Standard ward	N	Singapore	Illumina HiSeq 2000
ERR3210076	0.12118	0.14526	1.95968e+07	0.999813	3.2612e+09	18.5533	chng	Pulse oxymeter	surface	high	swab	NA	Standard ward	N	Singapore	Illumina HiSeq 2000
ERR3210077	0.88154	0.891137	1.01344e+09	0.991872	4.53735e+08	16.0031	chng	Cardiac table	surface	high	swab	NA	Standard ward	N	Singapore	Illumina HiSeq 2000
ERR3210080	0.87978	0.889511	8.86194e+08	0.999507	1.75966e+09	17.6232	chng	Aerator	sink	sink	swab	NA	Standard ward	N	Singapore	Illumina HiSeq 2000
ERR3210081	0.93941	0.944466	7.5902e+08	0.998657	1.83459e+08	16.0384	chng	Sink trap	sink	sink	swab	NA	Standard ward	N	Singapore	Illumina HiSeq 2000
ERR3210082	0.48894	0.519927	2.78083e+08	0.999222	1.63667e+10	19.0062	chng	Door handle	surface	high	swab	NA	Isolation room	N	Singapore	Illumina HiSeq 2000
ERR3210083	0.5068	0.537261	7.505e+08	0.999918	4.0147e+10	19.9896	chng	Bedside locker	surface	high	swab	NA	Standard ward	N	Singapore	Illumina HiSeq 2000
ERR3210084	0.83947	0.852181	5.49018e+08	0.999345	1.44592e+09	17.7152	chng	Aerator	sink	sink	swab	NA	Standard ward	N	Singapore	Illumina HiSeq 2000
ERR3210085	0.88716	0.896329	8.38046e+08	0.999063	1.34332e+09	16.8694	chng	Aerator	sink	sink	swab	NA	Standard ward	N	Singapore	Illumina HiSeq 2000
ERR3210086	0.57308	0.601146	6.9552e+08	0.998379	2.15878e+10	19.2973	chng	Cardiac table	surface	high	swab	NA	Standard ward	N	Singapore	Illumina HiSeq 2000
ERR3210087	0.87998	0.889696	8.89572e+08	0.999395	1.86936e+09	17.9958	chng	Aerator	sink	sink	swab	NA	Standard ward	N	Singapore	Illumina HiSeq 2000
ERR3210088	0.94941	0.953652	8.78104e+08	0.998924	1.75023e+08	16.1084	chng	Sink trap	sink	sink	swab	NA	Standard ward	N	Singapore	Illumina HiSeq 2000
ERR3210089	0.39369	0.426504	2.64323e+08	0.999363	1.83542e+10	19.5626	chng	Bedrail	surface	high	swab	NA	Standard ward	N	Singapore	Illumina HiSeq 2000
ERR3210090	0.31356	0.346399	2.63707e+08	0.999532	2.77729e+10	20.0335	chng	Bedrail	surface	high	swab	NA	Standard ward	N	Singapore	Illumina HiSeq 2000
ERR3210091	0.88699	0.896172	9.42328e+08	0.999367	1.70869e+09	17.8974	chng	Aerator	sink	sink	swab	NA	Standard ward	N	Singapore	Illumina HiSeq 2000
ERR3210092	0.49973	0.530406	9.94158e+07	0.999355	3.03817e+09	17.9905	chng	Pulse oxymeter	surface	high	swab	NA	Isolation room	N	Singapore	Illumina HiSeq 2000
ERR3210093	0.70639	0.727794	7.17665e+08	0.999203	5.58191e+09	18.8297	chng	Bedside locker	surface	high	swab	NA	Isolation room	N	Singapore	Illumina HiSeq 2000
ERR3210094	0.54794	0.576993	4.62963e+08	0.999396	2.70031e+10	19.107	chng	Door handle	surface	high	swab	NA	Isolation room	N	Singapore	Illumina HiSeq 2000
ERR3210095	0.52329	0.553219	2.94762e+08	0.996613	2.5131e+10	18.6063	chng	Door handle	surface	high	swab	NA	Isolation room	N	Singapore	Illumina HiSeq 2000
ERR3210096	0.55574	0.584497	2.96383e+08	0.999706	5.56186e+09	18.9149	chng	Pulse oxymeter	surface	high	swab	NA	Standard ward	N	Singapore	Illumina HiSeq 2000
ERR3210099	0.57077	0.59893	1.37524e+08	0.999652	2.02302e+09	18.157	chng	Sink trap	sink	sink	swab	NA	Isolation room	N	Singapore	Illumina HiSeq 2000
ERR3210100	0.56503	0.593422	2.39376e+08	0.999674	3.8686e+09	18.7116	chng	Pulse oxymeter	surface	high	swab	NA	MDRO ward	N	Singapore	Illumina HiSeq 2000
ERR3210101	0.58525	0.612805	6.18483e+08	0.999657	9.50919e+09	19.5665	chng	Cardiac table	surface	high	swab	NA	Isolation room	N	Singapore	Illumina HiSeq 2000
ERR3210102	0.68024	0.703126	7.1619e+08	0.99952	1.98996e+10	18.659	chng	Bedrail	surface	high	swab	NA	Standard ward	N	Singapore	Illumina HiSeq 2000
ERR3210103	0.56182	0.59034	5.6743e+08	0.999734	1.67635e+10	19.3733	chng	Bedrail	surface	high	swab	NA	Standard ward	N	Singapore	Illumina HiSeq 2000
ERR3210104	0.67617	0.699279	8.40561e+08	0.996498	1.53475e+10	18.4525	chng	Bedside locker	surface	high	swab	NA	Standard ward	N	Singapore	Illumina HiSeq 2000
ERR3210105	0.69145	0.713711	7.62044e+08	0.999845	8.2463e+09	19.1249	chng	Bedside locker	surface	high	swab	NA	Standard ward	N	Singapore	Illumina HiSeq 2000
ERR3210106	0.61725	0.643363	5.44555e+08	0.999867	1.16684e+10	19.0356	chng	Cardiac table	surface	high	swab	NA	Standard ward	N	Singapore	Illumina HiSeq 2000
ERR3210107	0.71993	0.740536	8.72359e+08	0.999661	6.40632e+09	19.2564	chng	Cardiac table	surface	high	swab	NA	Standard ward	N	Singapore	Illumina HiSeq 2000
ERR3210108	0.63467	0.659941	6.28784e+08	0.999587	2.44894e+10	18.8633	chng	Door handle	surface	high	swab	NA	Isolation room	N	Singapore	Illumina HiSeq 2000
ERR3210109	0.55262	0.581496	2.93552e+08	0.999739	5.30116e+09	18.9673	chng	Pulse oxymeter	surface	high	swab	NA	Isolation room	N	Singapore	Illumina HiSeq 2000
ERR3210110	0.59429	0.621452	5.72616e+08	0.999737	8.90954e+09	19.3893	chng	Bedrail	surface	high	swab	NA	Isolation room	N	Singapore	Illumina HiSeq 2000
ERR3210111	0.4812	0.512398	4.47833e+08	0.999807	1.2163e+10	19.7105	chng	Cardiac table	surface	high	swab	NA	Standard ward	N	Singapore	Illumina HiSeq 2000
ERR3210113	0.81466	0.829128	8.20672e+08	0.988389	1.02324e+09	16.2983	chng	Cardiac table	surface	high	swab	NA	Standard ward	N	Singapore	Illumina HiSeq 2000
ERR3210114	0.50835	0.538763	3.87169e+08	0.999661	1.01545e+10	19.3788	chng	Pulse oxymeter	surface	high	swab	NA	Standard ward	N	Singapore	Illumina HiSeq 2000
ERR3210115	0.59108	0.618383	5.22651e+08	0.999817	8.9184e+09	19.2783	chng	Door handle	surface	high	swab	NA	Isolation room	N	Singapore	Illumina HiSeq 2000
ERR3675725	0.96886	0.971496	1.60601e+09	0.999399	8.41342e+08	17.3405	chng	Aerator	sink	sink	swab	NA	MDRO ward	N	Singapore	Illumina HiSeq 4000
ERR3675770	0.9816	0.983167	2.76487e+09	0.999366	4.55419e+08	16.6758	chng	Aerator	sink	sink	swab	NA	MDRO ward	N	Singapore	Illumina HiSeq 4000
ERR3675730	0.95725	0.960849	2.13493e+09	0.999455	1.27761e+09	17.8886	chng	Aerator	sink	sink	swab	NA	MDRO ward	N	Singapore	Illumina HiSeq 4000
ERR3675782	0.9775	0.979412	3.35789e+09	0.999497	1.4244e+09	17.8134	chng	Aerator	sink	sink	swab	NA	MDRO ward	N	Singapore	Illumina HiSeq 4000
ERR3675791	0.97198	0.974355	2.53219e+09	0.999267	6.56211e+08	16.9102	chng	Aerator	sink	sink	swab	NA	Standard ward	N	Singapore	Illumina HiSeq 4000
ERR3675732	0.98286	0.98432	3.57083e+09	0.999394	4.49784e+08	16.4674	chng	Aerator	sink	sink	swab	NA	Standard ward	N	Singapore	Illumina HiSeq 4000
ERR3675738	0.98099	0.982608	2.52124e+09	0.99899	9.67014e+08	17.6481	chng	Aerator	sink	sink	swab	NA	Standard ward	N	Singapore	Illumina HiSeq 4000
ERR3675794	0.9548	0.9586	2.15563e+09	0.999508	9.96847e+08	17.5546	chng	Aerator	sink	sink	swab	NA	Standard ward	N	Singapore	Illumina HiSeq 4000
ERR3675784	0.98638	0.987542	3.26097e+09	0.999284	7.09841e+08	16.7553	chng	Aerator	sink	sink	swab	NA	Isolation room	N	Singapore	Illumina HiSeq 4000
ERR3675786	0.95087	0.954993	2.60373e+09	0.999875	2.22563e+09	17.6614	chng	Aerator	sink	sink	swab	NA	Isolation room	N	Singapore	Illumina HiSeq 4000
ERR3675739	0.98209	0.983615	2.43926e+09	0.998601	5.23332e+08	16.7717	chng	Aerator	sink	sink	swab	NA	Isolation room	N	Singapore	Illumina HiSeq 4000
ERR3675746	0.99058	0.991385	4.01448e+09	0.999225	4.12252e+08	16.5546	chng	Aerator	sink	sink	swab	NA	Isolation room	N	Singapore	Illumina HiSeq 4000
ERR3675752	0.96431	0.967324	2.73371e+09	0.998541	7.00028e+08	16.9377	chng	Aerator	sink	sink	swab	NA	Isolation room	N	Singapore	Illumina HiSeq 4000
ERR3675723	0.3815	0.414415	3.1566e+08	0.99972	1.43573e+10	19.8584	chng	Bedrail	surface	high	swab	NA	MDRO ward	N	Singapore	Illumina HiSeq 4000
ERR3675758	0.69251	0.714711	1.01013e+09	0.999848	1.35822e+10	19.1796	chng	Bedrail	surface	high	swab	NA	MDRO ward	N	Singapore	Illumina HiSeq 4000
ERR3675761	0.91326	0.920404	1.69347e+09	0.998634	9.22917e+08	17.1839	chng	Bedrail	surface	high	swab	NA	MDRO ward	N	Singapore	Illumina HiSeq 4000
ERR3675764	0.65367	0.677978	8.68534e+08	0.999813	1.74361e+10	19.3571	chng	Bedrail	surface	high	swab	NA	MDRO ward	N	Singapore	Illumina HiSeq 4000
ERR3675767	0.88547	0.894768	2.36742e+09	0.999233	3.59317e+09	18.597	chng	Bedrail	surface	high	swab	NA	MDRO ward	N	Singapore	Illumina HiSeq 4000
ERR3675727	0.47317	0.504576	6.34762e+07	0.999522	1.94473e+09	17.8056	chng	Bedrail	surface	high	swab	NA	MDRO ward	N	Singapore	Illumina HiSeq 4000
ERR3675773	0.70242	0.724054	1.17348e+09	0.999834	2.62995e+10	19.0464	chng	Bedrail	surface	high	swab	NA	MDRO ward	N	Singapore	Illumina HiSeq 4000
ERR3675776	0.83541	0.848412	3.7121e+08	0.999171	1.10298e+09	17.5072	chng	Bedrail	surface	high	swab	NA	MDRO ward	N	Singapore	Illumina HiSeq 4000
ERR3675779	0.60858	0.635098	2.60964e+08	0.999153	5.66882e+09	18.2236	chng	Bedrail	surface	high	swab	NA	MDRO ward	N	Singapore	Illumina HiSeq 4000
ERR3675788	0.64321	0.668054	9.20381e+08	0.999435	4.4161e+10	19.1963	chng	Bedrail	surface	high	swab	NA	Standard ward	N	Singapore	Illumina HiSeq 4000
ERR3675734	0.5157	0.545879	7.8379e+08	0.99988	5.97965e+10	19.9213	chng	Bedrail	surface	high	swab	NA	Standard ward	N	Singapore	Illumina HiSeq 4000
ERR3675740	0.46665	0.498217	2.96558e+08	0.999756	1.08133e+10	19.3429	chng	Bedrail	surface	high	swab	NA	Isolation room	N	Singapore	Illumina HiSeq 4000
ERR3675747	0.74643	0.765415	2.53765e+09	0.998605	2.1199e+10	20.0921	chng	Bedrail	surface	high	swab	NA	Isolation room	N	Singapore	Illumina HiSeq 4000
ERR3675753	0.4609	0.492602	5.02267e+07	0.999527	1.79944e+09	17.6183	chng	Bedrail	surface	high	swab	NA	Isolation room	N	Singapore	Illumina HiSeq 4000
ERR3675759	0.3506	0.383622	3.15364e+07	0.997273	5.84899e+09	17.8573	chng	Bedside locker	surface	high	swab	NA	MDRO ward	N	Singapore	Illumina HiSeq 4000
ERR3675762	0.73438	0.754112	6.63857e+08	0.999658	6.8695e+09	18.408	chng	Bedside locker	surface	high	swab	NA	MDRO ward	N	Singapore	Illumina HiSeq 4000
ERR3675765	0.94499	0.949593	2.50522e+09	0.997987	2.49894e+09	18.8594	chng	Bedside locker	surface	high	swab	NA	MDRO ward	N	Singapore	Illumina HiSeq 4000
ERR3675768	0.72317	0.743582	1.39499e+09	0.999422	1.09136e+10	19.5097	chng	Bedside locker	surface	high	swab	NA	MDRO ward	N	Singapore	Illumina HiSeq 4000
ERR3675728	0.50644	0.536912	9.83842e+07	0.999521	3.69718e+09	17.97	chng	Bedside locker	surface	high	swab	NA	MDRO ward	N	Singapore	Illumina HiSeq 4000
ERR3675774	0.66054	0.684489	5.13058e+08	0.99984	6.16971e+09	18.9062	chng	Bedside locker	surface	high	swab	NA	MDRO ward	N	Singapore	Illumina HiSeq 4000
ERR3675777	0.51921	0.549275	3.45579e+08	0.999024	9.28639e+09	19.3073	chng	Bedside locker	surface	high	swab	NA	MDRO ward	N	Singapore	Illumina HiSeq 4000
ERR3675780	0.35987	0.392884	2.27185e+07	0.997689	4.2928e+09	17.4619	chng	Bedside locker	surface	high	swab	NA	MDRO ward	N	Singapore	Illumina HiSeq 4000
ERR3675789	0.44973	0.481678	3.0175e+08	0.999656	1.19695e+10	19.4506	chng	Bedside locker	surface	high	swab	NA	Standard ward	N	Singapore	Illumina HiSeq 4000
ERR3675735	0.46222	0.493892	8.00198e+08	0.99975	3.25567e+10	20.3615	chng	Bedside locker	surface	high	swab	NA	Standard ward	N	Singapore	Illumina HiSeq 4000
ERR3675741	0.29007	0.322599	7.25024e+07	0.99968	5.64035e+09	18.8571	chng	Bedside locker	surface	high	swab	NA	Isolation room	N	Singapore	Illumina HiSeq 4000
ERR3675748	0.91283	0.920008	2.03404e+09	0.999372	1.8656e+09	18.3245	chng	Bedside locker	surface	high	swab	NA	Isolation room	N	Singapore	Illumina HiSeq 4000
ERR3675754	0.52987	0.559574	6.44535e+08	0.999656	1.36671e+10	19.8625	chng	Bedside locker	surface	high	swab	NA	Isolation room	N	Singapore	Illumina HiSeq 4000
ERR3675724	0.72936	0.749398	1.65457e+09	0.999449	1.29523e+10	19.5268	chng	Cardiac table	surface	high	swab	NA	MDRO ward	N	Singapore	Illumina HiSeq 4000
ERR3675760	0.75387	0.772386	1.67958e+09	0.998984	1.42221e+10	19.0403	chng	Cardiac table	surface	high	swab	NA	MDRO ward	N	Singapore	Illumina HiSeq 4000
ERR3675763	0.42638	0.458765	2.10626e+08	0.999659	7.6648e+09	19.2344	chng	Cardiac table	surface	high	swab	NA	MDRO ward	N	Singapore	Illumina HiSeq 4000
ERR3675766	0.62703	0.652675	2.08117e+09	0.995877	6.16166e+10	20.5426	chng	Cardiac table	surface	high	swab	NA	MDRO ward	N	Singapore	Illumina HiSeq 4000
ERR3675769	0.65906	0.683087	1.32856e+09	0.999695	1.50639e+10	19.8767	chng	Cardiac table	surface	high	swab	NA	MDRO ward	N	Singapore	Illumina HiSeq 4000
ERR3675729	0.96193	0.965142	1.90968e+09	0.995041	9.27622e+08	17.005	chng	Cardiac table	surface	high	swab	NA	MDRO ward	N	Singapore	Illumina HiSeq 4000
ERR3675772	0.71697	0.737752	1.68079e+09	0.999531	1.4062e+10	19.7288	chng	Cardiac table	surface	high	swab	NA	MDRO ward	N	Singapore	Illumina HiSeq 4000
ERR3675775	0.68854	0.710964	1.36793e+09	0.999489	2.26321e+10	19.3014	chng	Cardiac table	surface	high	swab	NA	MDRO ward	N	Singapore	Illumina HiSeq 4000
ERR3675778	0.8026	0.817901	8.44805e+08	0.999498	3.49917e+09	18.4835	chng	Cardiac table	surface	high	swab	NA	MDRO ward	N	Singapore	Illumina HiSeq 4000
ERR3675781	0.57048	0.598652	7.3737e+08	0.998521	1.07324e+11	19.4155	chng	Cardiac table	surface	high	swab	NA	MDRO ward	N	Singapore	Illumina HiSeq 4000
ERR3675790	0.93988	0.944898	2.438e+09	0.997615	2.88033e+09	17.9598	chng	Cardiac table	surface	high	swab	NA	Standard ward	N	Singapore	Illumina HiSeq 4000
ERR3675736	0.65764	0.681741	2.29674e+09	0.999879	4.1529e+10	20.2017	chng	Cardiac table	surface	high	swab	NA	Standard ward	N	Singapore	Illumina HiSeq 4000
ERR3675742	0.8375	0.850352	1.79543e+09	0.996661	3.8101e+09	17.7292	chng	Cardiac table	surface	high	swab	NA	Isolation room	N	Singapore	Illumina HiSeq 4000
ERR3675749	0.92549	0.931665	2.2828e+09	0.998929	2.76209e+09	18.8785	chng	Cardiac table	surface	high	swab	NA	Isolation room	N	Singapore	Illumina HiSeq 4000
ERR3675755	0.43603	0.468247	1.81492e+08	0.999663	6.68778e+09	19.0368	chng	Cardiac table	surface	high	swab	NA	Isolation room	N	Singapore	Illumina HiSeq 4000
ERR3675743	0.63361	0.658934	1.05797e+09	0.999591	3.93254e+10	19.2915	chng	Door handle	surface	high	swab	NA	Isolation room	N	Singapore	Illumina HiSeq 4000
ERR3675792	0.76056	0.778649	5.06006e+08	0.995382	3.67941e+09	17.1824	chng	Pulse oxymeter	surface	high	swab	NA	Standard ward	N	Singapore	Illumina HiSeq 4000
ERR3675744	0.60546	0.632121	4.29429e+08	0.999664	1.30344e+10	18.7317	chng	Pulse oxymeter	surface	high	swab	NA	Isolation room	N	Singapore	Illumina HiSeq 4000
ERR3675750	0.7497	0.768479	4.66076e+08	0.999444	3.02404e+09	18.2601	chng	Pulse oxymeter	surface	high	swab	NA	Isolation room	N	Singapore	Illumina HiSeq 4000
ERR3675756	0.49747	0.528212	9.86368e+07	0.999444	2.62059e+09	18.1354	chng	Pulse oxymeter	surface	high	swab	NA	Isolation room	N	Singapore	Illumina HiSeq 4000
ERR3675726	0.99114	0.991898	2.31592e+09	0.997235	1.50157e+08	16.2193	chng	Sink trap	sink	sink	swab	NA	MDRO ward	N	Singapore	Illumina HiSeq 4000
ERR3675771	0.98114	0.982746	3.48226e+09	0.999015	7.09017e+08	17.4592	chng	Sink trap	sink	sink	swab	NA	MDRO ward	N	Singapore	Illumina HiSeq 4000
ERR3675731	0.99444	0.994916	3.13059e+09	0.998585	1.92273e+08	16.3762	chng	Sink trap	sink	sink	swab	NA	MDRO ward	N	Singapore	Illumina HiSeq 4000
ERR3675783	0.98526	0.986517	2.69886e+09	0.999331	4.24354e+08	16.7011	chng	Sink trap	sink	sink	swab	NA	MDRO ward	N	Singapore	Illumina HiSeq 4000
ERR3675793	0.98638	0.987542	2.31537e+09	0.997932	1.90703e+08	16.382	chng	Sink trap	sink	sink	swab	NA	Standard ward	N	Singapore	Illumina HiSeq 4000
ERR3675733	0.9913	0.992044	4.45686e+09	0.998782	1.89133e+08	16.3979	chng	Sink trap	sink	sink	swab	NA	Standard ward	N	Singapore	Illumina HiSeq 4000
ERR3675737	0.98468	0.985986	2.9869e+09	0.998237	1.4701e+08	16.2697	chng	Sink trap	sink	sink	swab	NA	Standard ward	N	Singapore	Illumina HiSeq 4000
ERR3675795	0.97676	0.978734	2.17013e+09	0.998978	3.04797e+08	16.7527	chng	Sink trap	sink	sink	swab	NA	Standard ward	N	Singapore	Illumina HiSeq 4000
ERR3675785	0.95238	0.956379	2.34531e+09	0.999475	1.28856e+09	17.7307	chng	Sink trap	sink	sink	swab	NA	Isolation room	N	Singapore	Illumina HiSeq 4000
ERR3675787	0.93774	0.942931	2.64068e+09	0.999636	2.14505e+09	18.1062	chng	Sink trap	sink	sink	swab	NA	Isolation room	N	Singapore	Illumina HiSeq 4000
ERR3675745	0.82077	0.834811	9.5114e+08	0.999068	4.08928e+09	17.8406	chng	Sink trap	sink	sink	swab	NA	Isolation room	N	Singapore	Illumina HiSeq 4000
ERR3675751	0.97672	0.978698	2.80778e+09	0.999463	4.9697e+08	17.0439	chng	Sink trap	sink	sink	swab	NA	Isolation room	N	Singapore	Illumina HiSeq 4000
ERR3675757	0.8641	0.875008	7.18833e+08	0.999132	1.902e+09	16.8795	chng	Sink trap	sink	sink	swab	NA	Isolation room	N	Singapore	Illumina HiSeq 4000
ERR3928854	0.9736	0.97584	3.96874e+09	0.999129	4.09759e+08	16.3133	constantinides	Sink trap	sink	sink	aspirate	NA	General medicine	N	UK	Illumina HiSeq 4000
ERR3928886	0.96483	0.967801	2.0272e+09	0.99915	4.79364e+08	16.4279	constantinides	Sink trap	sink	sink	aspirate	NA	General medicine	N	UK	Illumina HiSeq 4000
ERR3928887	0.9907	0.991495	5.33996e+09	0.998692	6.02547e+08	16.9564	constantinides	Sink trap	sink	sink	aspirate	NA	General medicine	N	UK	Illumina HiSeq 4000
ERR3928888	0.96805	0.970753	5.52919e+09	0.999132	1.97372e+09	17.3955	constantinides	Sink trap	sink	sink	aspirate	NA	General medicine	N	UK	Illumina HiSeq 4000
ERR3928889	0.98762	0.988677	6.02364e+09	0.999585	6.99251e+08	16.7943	constantinides	Sink trap	sink	sink	aspirate	NA	General medicine	N	UK	Illumina HiSeq 4000
ERR3928891	0.98627	0.987442	1.92197e+09	0.999048	2.73681e+08	16.3193	constantinides	Sink trap	sink	sink	aspirate	NA	General medicine	N	UK	Illumina HiSeq 4000
ERR3928892	0.78214	0.798821	1.94803e+09	0.999724	1.04326e+10	19.2934	constantinides	Sink trap	sink	sink	aspirate	NA	ICU	N	UK	Illumina HiSeq 4000
ERR3928893	0.98057	0.982224	6.69847e+09	0.999657	7.29541e+08	16.5827	constantinides	Sink trap	sink	sink	aspirate	NA	General medicine	N	UK	Illumina HiSeq 4000
ERR3928894	0.841	0.8536	1.88746e+09	0.999185	4.89969e+09	18.6141	constantinides	Sink trap	sink	sink	aspirate	NA	ICU	N	UK	Illumina HiSeq 4000
ERR3928895	0.87007	0.880532	2.44919e+09	0.999242	4.67261e+09	18.3072	constantinides	Sink trap	sink	sink	aspirate	NA	ICU	N	UK	Illumina HiSeq 4000
ERR3928896	0.77547	0.792591	2.03085e+09	0.999904	1.4056e+10	19.3035	constantinides	Sink trap	sink	sink	aspirate	NA	ICU	N	UK	Illumina HiSeq 4000
ERR3928897	0.80804	0.822967	2.36624e+09	0.999156	8.95236e+09	19.0771	constantinides	Sink trap	sink	sink	aspirate	NA	ICU	N	UK	Illumina HiSeq 4000
ERR3928898	0.75278	0.771365	2.1655e+09	0.999552	1.29802e+10	19.6748	constantinides	Sink trap	sink	sink	aspirate	NA	ICU	N	UK	Illumina HiSeq 4000
ERR3928899	0.78615	0.802564	1.93918e+09	0.99959	9.21388e+09	19.3014	constantinides	Sink trap	sink	sink	aspirate	NA	ICU	N	UK	Illumina HiSeq 4000
ERR3928900	0.66839	0.691921	2.20941e+09	0.999799	3.35104e+10	20.1291	constantinides	Sink trap	sink	sink	aspirate	NA	ICU	N	UK	Illumina HiSeq 4000
ERR3928901	0.8195	0.83363	2.15146e+09	0.999697	8.98752e+09	18.8209	constantinides	Sink trap	sink	sink	aspirate	NA	Acute admission	N	UK	Illumina HiSeq 4000
ERR3928902	0.85511	0.866682	2.18178e+09	0.999664	1.06805e+10	18.1408	constantinides	Sink trap	sink	sink	aspirate	NA	Acute admission	N	UK	Illumina HiSeq 4000
ERR3928903	0.90609	0.913796	1.8468e+09	0.999377	1.99153e+09	17.8564	constantinides	Sink trap	sink	sink	aspirate	NA	Acute admission	N	UK	Illumina HiSeq 4000
ERR3928924	0.87344	0.883649	1.92099e+09	0.998189	1.2098e+10	18.1969	constantinides	Sink trap	sink	sink	aspirate	NA	Acute admission	N	UK	Illumina HiSeq 4000
ERR3928927	0.95553	0.95927	5.21686e+09	0.999236	1.08566e+09	17.1193	constantinides	Sink trap	sink	sink	aspirate	NA	General medicine	N	UK	Illumina HiSeq 4000
